# Supplementary material for: Modelling of climate change impact on flow conditions in the lowland anastomosing river
Source: PeerJ. 2020 Jun 23;8:e9275. doi: 10.7717/peerj.9275 (PMC7319031; doi:10.7717/peerj.9275)
Supplement: Supplemental Information 2 — Q_model 1–9 refers to Regional Climate Model ensemble used in the study [file peerj-08-9275-s002.xlsx]

## Sheet: 2023-2050
Date	Q_model1	Q_model2	Q_model3	Q_model4	Q_model5	Q_model6	Q_model7	Q_model8	Q_model9
2023-01-01	20.57	50.53	29.73	16.47	43.44	15.07	10.72	5.138	14.03
2023-01-02	19.97	49.04	29.72	16.73	42.75	14.83	10.33	5.032	13.13
2023-01-03	19.45	46.81	29.55	16.6	41.98	14.59	9.918	4.917	11.64
2023-01-04	19.59	44.23	29.26	16.09	41.21	14.34	9.446	4.798	9.986
2023-01-05	19.1	42.05	28.83	15.42	40.44	14.09	8.944	4.67	8.433
2023-01-06	18.2	42.37	34.06	15.36	39.7	13.84	8.607	4.551	7.12
2023-01-07	18.28	46.84	35.91	15.11	39	13.59	8.283	4.448	6.072
2023-01-08	17.91	48.5	35.54	14.75	38.35	13.34	8.294	4.354	5.268
2023-01-09	17.26	48.58	35.34	14.6	37.72	16	8.491	4.272	4.658
2023-01-10	16.69	48.61	35.24	14.6	37.07	17.67	8.806	4.196	4.194
2023-01-11	19.5	48.3	34.73	16.62	36.34	21.41	16.56	4.116	3.833
2023-01-12	20.92	47.2	33.87	17.73	35.61	23.85	21.6	4.042	3.548
2023-01-13	20.95	45.51	34.71	21.03	38.21	24.19	23.91	3.981	3.307
2023-01-14	20.47	43.61	34.99	24.03	38.88	23.68	25.41	3.925	3.115
2023-01-15	19.8	41.73	34.34	25.16	38.67	22.68	25.95	3.865	2.946
2023-01-16	19.02	40.05	33.61	25.57	38.96	21.26	25.18	3.796	2.813
2023-01-17	18.16	38.61	33.07	25.7	46.11	19.54	23.31	3.737	2.706
2023-01-18	17.48	37.4	32.66	25.51	52.06	21.6	20.91	3.672	2.613
2023-01-19	16.97	36.31	32.16	24.91	55.05	36.9	18.48	3.596	2.527
2023-01-20	16.45	35.29	31.57	24.04	57.67	46.35	16.27	3.524	2.445
2023-01-21	16.06	34.93	31.07	23.13	60.3	52.78	14.42	3.457	2.363
2023-01-22	15.86	34.29	30.45	22.23	60.33	58.33	12.9	3.381	2.293
2023-01-23	15.68	33.6	29.8	21.44	58.71	59.57	11.68	3.298	2.219
2023-01-24	15.45	33.05	29.3	20.84	56.83	56.31	10.73	3.225	2.148
2023-01-25	15.19	32.59	28.69	20.29	54.83	50.2	9.973	3.175	4.514
2023-01-26	14.89	32.61	28.15	19.75	56.11	65.2	9.321	3.109	6.367
2023-01-27	14.52	32.25	27.73	19.33	56.28	73.08	8.764	3.049	8.119
2023-01-28	14.13	31.59	27.23	18.94	54.52	75.06	8.294	2.984	10.18
2023-01-29	13.77	30.91	26.82	18.55	52.6	78.6	7.893	2.899	11.77
2023-01-30	13.44	30.28	26.35	18.21	52.34	81.85	7.53	5.532	23.97
2023-01-31	13.18	29.67	25.89	18.04	52.98	82.57	18.42	14.05	40.72
2023-02-01	13	29.03	25.44	17.83	56.16	80.27	27.71	20.69	48.06
2023-02-02	12.89	28.39	26.27	20.88	57.81	75.52	34.09	26.06	49.22
2023-02-03	12.87	27.87	26.68	22.86	62.22	69.3	39.91	30.76	47.74
2023-02-04	12.8	27.32	26.92	23.79	62.74	62.67	43.57	33.26	45.32
2023-02-05	12.64	26.75	29.56	24.87	61.2	56.39	43.85	32.88	42.03
2023-02-06	12.44	26.2	31.37	25.62	59.84	50.9	41.22	30.18	38.23
2023-02-07	12.2	25.7	32.13	25.87	58.61	46.32	37.03	28.71	39.02
2023-02-08	11.96	25.18	32.65	25.81	57.21	42.6	32.66	25.92	38.87
2023-02-09	11.7	24.72	33.07	25.42	55.81	39.53	28.74	22.4	37.86
2023-02-10	11.44	24.19	33.28	24.66	59.45	37.05	25.36	19.15	37.17
2023-02-11	11.18	23.64	33.1	23.74	60.08	35.01	22.44	17.94	37.31
2023-02-12	10.91	23.16	32.55	22.78	58.71	33.32	19.84	17.05	36.15
2023-02-13	10.65	22.64	31.76	24.62	57.53	31.89	17.49	16.67	33.95
2023-02-14	10.4	22.13	30.85	25.68	56.54	30.63	15.47	16.82	31.64
2023-02-15	10.16	21.7	29.89	25.84	55.43	29.41	13.76	17.04	29.58
2023-02-16	9.933	21.26	28.97	25.44	54.47	28.33	12.34	17	27.91
2023-02-17	9.695	20.77	28.07	24.37	54.85	27.38	11.17	16.72	26.32
2023-02-18	9.466	20.26	27.28	23.03	54.09	26.51	10.22	16.38	24.83
2023-02-19	9.232	19.79	26.64	21.6	52.78	25.69	12.36	20.49	29.33
2023-02-20	9.873	19.39	25.95	20.32	51.45	24.99	20.4	23.91	30.71
2023-02-21	11.71	18.95	25.37	19.27	50.46	24.21	26.65	24.79	31.3
2023-02-22	17.05	27.33	24.85	18.36	49.27	23.56	31.19	45.64	36.71
2023-02-23	21.7	32.13	46.64	30.68	48.18	22.9	34.85	54.67	39.64
2023-02-24	26.18	34.07	73.3	66.81	47.68	22.35	36.68	54.26	42.73
2023-02-25	29.52	35.85	87.18	89.05	46.92	21.84	41.19	52.45	44.73
2023-02-26	31.59	36.91	99.1	103.9	46.02	40.01	50	50.3	45.65
2023-02-27	32.12	36.48	111.4	115.6	45.29	60.5	53.27	47.5	48.56
2023-02-28	31.24	34.77	122.2	122.3	44.57	67.88	54.17	44.25	49.25
2023-03-01	29.76	32.36	126	121.1	43.93	69.71	56.95	40.88	48.24
2023-03-02	28.19	30.13	126.9	114.5	43.26	70.91	59.68	37.9	47.1
2023-03-03	26.26	27.94	122.3	104.9	42.63	70.14	59.13	35.15	45.38
2023-03-04	24.32	26.06	115.4	94.88	41.83	66.8	57.29	32.63	42.98
2023-03-05	22.65	32.29	107.9	85.34	41.09	61.39	56	30.45	40.26
2023-03-06	21.63	32.58	100.4	76.64	40.47	57.65	56.11	28.62	37.43
2023-03-07	20.81	30.56	92.85	68.92	39.91	53.58	58.62	26.98	34.73
2023-03-08	20.1	29.07	85.72	62.2	39.1	49.6	58.64	26.66	34.96
2023-03-09	19.23	28.37	79.44	56.62	38.48	46.39	56.57	25.99	38.97
2023-03-10	18.46	27.92	73.81	51.98	37.93	44.48	53.67	25.18	38.11
2023-03-11	17.76	27.18	68.81	48.02	37.38	46.17	51.28	24.43	34.86
2023-03-12	17.03	26.13	67.71	47.8	36.86	45.62	48.5	23.72	32.06
2023-03-13	16.33	24.93	65.54	46.52	36.5	44.19	45.26	23.1	29.84
2023-03-14	15.53	23.63	62.21	44.53	36.23	43.07	42.23	22.54	28.02
2023-03-15	14.81	22.41	61.96	45.06	35.61	42.16	39.46	21.98	26.51
2023-03-16	14.57	22.01	61.12	44.8	34.81	41.04	39.17	22.57	25.05
2023-03-17	14.36	21.72	59.2	43.47	33.96	39.65	38.08	22.43	23.96
2023-03-18	14.02	21.23	57.53	42.25	33.06	38.15	36.26	24.45	23.49
2023-03-19	13.75	20.7	55.74	41.43	32.1	36.53	34.57	25.33	24.05
2023-03-20	13.57	20.39	53.49	40.97	31.28	35.22	33.68	28.41	23.93
2023-03-21	13.52	20.12	51.08	40.08	30.88	34.16	32.46	32.04	23.52
2023-03-22	14.78	20.96	49.07	38.92	30.36	32.99	30.98	32.76	23.09
2023-03-23	15.01	20.73	47.39	37.75	29.73	31.89	29.95	32.2	22.62
2023-03-24	14.65	19.98	45.58	36.5	29.11	30.86	28.88	31.44	21.98
2023-03-25	14.39	21.37	43.69	35.09	28.9	30.03	27.59	30.72	21.17
2023-03-26	14.12	22.06	42.3	33.63	28.49	29.91	29.94	29.73	20.39
2023-03-27	13.73	21.57	40.77	31.77	27.76	29.3	30.26	28.26	19.41
2023-03-28	13.44	21.25	39.28	31.2	27.08	28.25	29.99	36.46	20.91
2023-03-29	13.33	21.29	38.17	33.69	26.67	27.29	29.9	56.75	20.88
2023-03-30	13.34	21.11	36.77	32.71	26.07	26.25	33.58	60.18	20
2023-03-31	13.44	20.47	35.93	31.34	25.36	25.87	38.73	55.04	19.24
2023-04-01	13.56	19.63	35.27	29.66	24.52	25.46	40.86	51.06	18.52
2023-04-02	13.46	18.79	34.42	28.23	24.22	24.75	40.01	48.6	17.79
2023-04-03	13.11	17.91	33.55	27.07	23.53	23.98	38.71	46.6	17.63
2023-04-04	17.48	17.2	32.57	26.09	22.79	22.86	38.1	44.13	16.93
2023-04-05	21.6	16.54	31.77	25.33	22.11	23.12	37.29	41.17	17.55
2023-04-06	23.32	15.93	30.93	24.61	21.93	23.02	35.88	38.67	17.26
2023-04-07	33.53	15.35	30	23.68	21.31	23.91	34.01	36.15	16.43
2023-04-08	50.61	14.85	29.04	22.71	20.68	26.9	33.57	33.85	15.83
2023-04-09	57.36	14.31	28.09	21.79	21.5	28.72	31.75	32.09	15.86
2023-04-10	61.56	15.94	27.42	20.98	21.56	29.6	38.37	30.79	15.94
2023-04-11	62.54	16.52	26.88	20.08	20.54	29.96	40.56	29.4	15.63
2023-04-12	62.19	16.53	26.32	19.23	20.8	29.95	38.51	28.13	15.3
2023-04-13	58.92	17.82	25.68	18.34	20.42	29.93	37.65	27.27	15.07
2023-04-14	56.13	18.48	24.9	17.45	19.49	29.38	37.26	26.32	14.71
2023-04-15	53.42	24.45	24.22	17.02	18.76	28.39	36.68	25.55	14.39
2023-04-16	49.33	24.51	23.36	16.74	18.12	27.5	35.66	24.98	14.22
2023-04-17	53.24	25.12	24.79	16.47	17.38	27.03	33.78	24.25	13.97
2023-04-18	57.44	24.22	25.33	16.49	16.63	26.72	31.72	23.27	13.59
2023-04-19	56.75	22.81	25.48	16.11	16.33	26.35	29.78	22.58	13.08
2023-04-20	54.69	22.02	26.18	15.79	16.16	25.77	27.6	22.2	12.56
2023-04-21	53.79	22.78	26.82	15.5	15.94	25.01	26.19	22.14	12.19
2023-04-22	51.03	22.19	26.99	15.21	15.54	23.96	24.52	21.77	12.26
2023-04-23	46.99	20.65	26.75	14.7	15.51	22.81	24.97	21.29	12.05
2023-04-24	43.09	19.7	25.97	14.07	15.44	21.69	24.96	20.78	11.63
2023-04-25	40.1	18.95	24.63	13.49	15.16	20.49	24.85	19.76	11.16
2023-04-26	41.75	20.19	23.01	12.82	15.07	19.69	24.41	18.68	10.55
2023-04-27	41.02	20.13	21.47	12.14	14.75	19.34	23.37	17.75	10.03
2023-04-28	38.93	19.42	19.99	11.47	14.43	18.7	22.07	16.81	9.457
2023-04-29	38.24	21.16	18.63	11.26	14.11	18.02	21.11	16.25	8.903
2023-04-30	37.67	22.54	17.96	11.15	13.5	17.41	21.32	15.59	8.502
2023-05-01	36.74	22.61	17.19	10.85	13.64	16.83	20.5	15.98	7.992
2023-05-02	37.88	22.49	16.68	10.68	24.67	16.56	19.12	16.9	8.807
2023-05-03	38.22	22.21	16.57	10.62	30.11	16.24	18.26	16.2	9.35
2023-05-04	37.99	21.78	16.43	10.71	30.03	15.71	17.42	15.4	9.62
2023-05-05	37.59	20.78	16.05	10.82	30.08	15.04	16.72	14.85	10.01
2023-05-06	36.74	19.82	15.54	10.87	30.46	14.17	16.42	14.58	10.1
2023-05-07	35.6	19.21	14.95	10.81	30.96	13.53	16.04	14.15	9.809
2023-05-08	38.77	18.13	14.27	10.57	30.51	13.19	15.67	13.56	9.217
2023-05-09	38.56	17.33	13.58	11.09	29.55	17.53	15.43	13.41	9.807
2023-05-10	39.68	16.67	12.93	11.05	28.37	17.34	15	18.45	10.02
2023-05-11	38.68	16.27	12.68	10.95	27.12	15.54	14.57	20.51	18.31
2023-05-12	35.9	15.82	12.31	10.98	25.31	14.2	14.01	20.43	20.91
2023-05-13	33.47	15.24	11.89	10.88	23.35	13.77	13.62	19.7	21.3
2023-05-14	31.13	14.92	12.02	10.61	21.72	13.21	13.15	18.91	23.07
2023-05-15	29.49	14.72	11.93	10.25	22.18	12.66	12.78	18.09	25.07
2023-05-16	27.59	14.54	11.32	9.713	22.07	12.31	12.28	16.95	25.55
2023-05-17	26.2	14.67	11.52	9.572	20.87	11.71	11.93	16.03	25.2
2023-05-18	25.13	15.13	11.35	9.14	19.75	11.35	11.79	15.09	23.08
2023-05-19	24.03	15.59	11.15	8.676	18.67	11.3	11.39	14.21	19.94
2023-05-20	22.94	15.82	11.18	8.373	17.86	11.16	11.09	13.87	17.49
2023-05-21	21.83	15.85	11.22	8.116	17.05	11.23	11.09	13.82	16.21
2023-05-22	20.75	15.65	11.08	7.739	16.03	11.28	11.1	13.27	15.06
2023-05-23	19.61	15.43	10.5	7.42	15.55	11.9	10.96	12.6	14.31
2023-05-24	18.5	14.87	10.87	7.282	15.03	11.51	10.77	12.7	13.71
2023-05-25	17.56	14.3	11.72	8.382	14.36	11.28	10.65	12.49	12.9
2023-05-26	16.71	13.76	11.63	8.544	13.88	11	10.34	12.7	12.12
2023-05-27	16.37	13.23	11.22	8.104	13.72	10.95	9.87	12.89	11.53
2023-05-28	15.77	12.85	10.98	7.818	13.44	10.8	10.69	12.98	11.13
2023-05-29	15.21	12.21	10.76	7.556	12.45	10.63	10.74	12.85	11.11
2023-05-30	14.78	11.3	10.9	7.253	12.01	10.31	9.965	12.59	11.16
2023-05-31	14.7	11.02	10.48	6.806	11.68	10	8.996	12.26	11.04
2023-06-01	15.47	11.14	9.506	6.664	11.34	9.413	8.485	11.77	10.89
2023-06-02	16.05	11.13	8.937	6.659	11.1	9.083	7.991	11.42	10.69
2023-06-03	16.29	11.07	8.39	6.832	10.97	8.771	7.604	11.21	10.46
2023-06-04	16.21	10.95	7.92	6.991	10.8	8.597	7.387	11.24	10.1
2023-06-05	15.84	10.73	7.645	7.113	10.41	8.56	7.329	10.95	9.668
2023-06-06	15.56	10.41	7.598	7.159	9.773	8.339	7.058	10.32	9.439
2023-06-07	15.13	10.55	7.655	7.083	9.289	8.099	7.076	9.493	9.287
2023-06-08	14.47	10.43	7.749	6.967	9.151	7.577	7.206	9.063	9.081
2023-06-09	13.65	10.29	8.136	6.769	8.949	7.513	7.29	8.946	9.54
2023-06-10	12.81	10.17	8.489	6.468	8.658	7.184	7.302	8.396	9.964
2023-06-11	11.94	9.801	8.725	6.308	8.661	7.221	7.118	8.253	10.4
2023-06-12	11.25	9.374	8.971	5.885	8.771	7.253	6.848	8.343	10.65
2023-06-13	11.21	9.008	10.27	5.565	10.09	7.233	6.541	8.798	10.77
2023-06-14	11	8.655	12.89	5.22	10.56	7.236	6.285	8.888	10.68
2023-06-15	10.76	8.506	15	4.806	10.23	7.135	7.46	8.816	10.34
2023-06-16	10.51	8.45	16.47	4.459	10.88	6.951	12.99	8.609	9.806
2023-06-17	10.3	9.111	17.04	4.394	10.79	6.594	16.24	8.238	9.155
2023-06-18	10.13	9.65	17.34	4.283	10.61	6.228	17.14	7.402	8.404
2023-06-19	10.31	10.27	17.19	4.342	10.3	6.338	16.77	7.099	7.56
2023-06-20	10.49	10.8	16.68	4.384	9.844	6.741	15.46	6.858	7.635
2023-06-21	10.44	11.53	16.16	4.309	9.162	7.034	14.26	17.12	8.314
2023-06-22	10.24	12.17	15.64	4.054	8.163	7.366	12.64	32.2	9.097
2023-06-23	10.18	12.34	14.92	4.125	7.278	7.593	21.27	47.45	9.687
2023-06-24	10.03	11.95	14.11	6.297	7.018	7.667	22.58	55.96	10.07
2023-06-25	9.894	11.27	13.41	10.69	6.9	7.359	18.51	55.06	9.818
2023-06-26	9.91	10.96	13.8	16.33	6.893	6.895	15.32	47.78	9.242
2023-06-27	10.17	10.31	16.37	29.8	6.712	6.623	13.78	38.62	8.465
2023-06-28	10.28	9.621	19.29	39.32	6.408	6.12	12.51	29.33	7.654
2023-06-29	10.19	8.868	21.53	43.55	6.374	5.579	11.72	23.54	7.136
2023-06-30	9.824	7.332	22.51	44.86	8.811	5.272	10.98	19	6.542
2023-07-01	8.927	6.035	21.78	43.7	9.583	4.981	10.21	15.94	6.016
2023-07-02	11.26	5.634	22.34	40.6	9.368	4.609	9.405	14.52	7.286
2023-07-03	11.77	5.77	21.97	36.76	9.118	4.054	8.82	13.46	31.84
2023-07-04	11.24	6.154	23.75	32.37	8.903	4.144	8.368	13.43	40.7
2023-07-05	10.85	6.718	24.63	28.22	8.726	4.356	8.139	14.89	35.42
2023-07-06	10.52	7.423	23.77	24.53	8.489	4.452	7.741	15.62	27.87
2023-07-07	9.592	8.127	22.16	21.5	8.048	4.491	7.396	15.45	21.76
2023-07-08	7.946	8.457	20.96	18.9	10.41	4.502	8.925	14.76	17.7
2023-07-09	6.812	8.47	19.61	17.09	11.54	4.387	9.535	13.89	15.76
2023-07-10	6.145	8.098	18.2	15.49	11.65	4.143	9.334	12.7	15.25
2023-07-11	5.625	8.786	17.34	14.23	11.29	4.046	9.03	11.71	13.3
2023-07-12	5.128	8.94	16.45	13.28	11.04	3.953	8.616	10.96	10.82
2023-07-13	4.967	8.513	15.3	12.51	10.69	3.899	8.341	10	8.563
2023-07-14	5.014	8.077	14.31	11.92	9.847	3.79	7.975	9.179	10.13
2023-07-15	5.215	7.605	13.73	11.41	10.53	3.74	7.438	8.724	16.07
2023-07-16	5.244	7.053	13.35	10.89	12.41	3.694	7.04	8.698	15.15
2023-07-17	5.356	6.063	13.08	10.78	14.13	7.857	6.538	8.669	11.61
2023-07-18	5.304	4.479	13.02	11.74	14.81	8.63	5.991	8.64	8.958
2023-07-19	5.224	4.316	12.85	12.6	14.43	7.163	5.793	8.528	7.701
2023-07-20	5.182	4.175	12.64	14.53	12.83	6.029	5.693	8.385	6.511
2023-07-21	6.188	3.778	12.39	17.3	11.2	5.332	6.867	7.994	5.64
2023-07-22	8.067	3.822	12.2	17.01	9.356	4.873	6.801	7.703	4.961
2023-07-23	10.31	4.176	11.86	15.92	7.647	4.383	6.371	7.398	4.566
2023-07-24	12.5	4.285	11.39	15.56	5.547	3.546	6.146	7.226	4.392
2023-07-25	13.92	4.272	10.93	15.47	4.526	2.969	6.055	7.327	4.365
2023-07-26	14.17	4.133	10.8	15.24	4.912	2.746	5.933	17.94	4.404
2023-07-27	14.82	3.868	10.86	14.46	5.826	2.716	5.522	28.53	4.461
2023-07-28	14.13	3.517	13.85	13.52	6.259	2.657	5.028	38.63	4.383
2023-07-29	12.78	3.487	14.88	12.48	6.19	2.493	4.807	44.29	4.019
2023-07-30	11.81	3.487	15.08	11.62	12.77	2.44	4.639	44.31	3.834
2023-07-31	10.69	3.405	15.11	11.29	16.06	2.509	4.449	39.2	3.683
2023-08-01	9.375	2.976	20.31	10.83	17.72	2.655	4.27	41.18	3.874
2023-08-02	8.428	2.881	23.48	10.25	18.1	2.683	3.995	37.86	4.007
2023-08-03	7.54	2.881	22.68	9.646	17.28	2.638	9.348	32.69	4.097
2023-08-04	6.736	2.879	21.04	9.038	15.54	2.664	11.32	27.85	4.248
2023-08-05	6.662	2.775	19.86	8.39	14	2.729	10.88	23.79	4.237
2023-08-06	6.606	2.592	18.61	7.948	12.25	2.689	10.48	21.56	4.278
2023-08-07	6.536	2.277	17.07	7.568	10.81	2.852	10.1	20.26	4.222
2023-08-08	6.626	2.167	16.24	7.167	9.365	2.891	9.292	18.32	4.224
2023-08-09	6.768	2.267	15.42	6.787	7.999	2.864	8.05	18.25	4.127
2023-08-10	6.692	2.422	14.34	6.584	6.804	2.805	6.841	18.25	3.955
2023-08-11	6.402	2.626	13.28	6.217	5.955	2.777	5.799	17.68	3.788
2023-08-12	5.897	2.764	12.36	5.85	5.399	2.715	4.944	17.22	3.623
2023-08-13	5.321	2.793	11.54	5.437	4.984	2.605	3.989	17.11	3.57
2023-08-14	4.889	2.804	11.13	5.368	4.901	2.695	3.415	16.35	3.497
2023-08-15	4.625	3.279	11.17	5.46	4.8	2.943	3.429	15.32	3.321
2023-08-16	4.552	3.141	11.02	5.496	4.656	3.116	3.305	14.22	3.304
2023-08-17	4.354	2.831	10.84	5.65	4.41	3.308	3.119	13.86	3.317
2023-08-18	3.989	2.629	10.6	5.736	4.057	3.368	2.989	13.32	3.142
2023-08-19	3.361	2.732	10.54	5.668	3.863	3.58	3.059	12.51	2.813
2023-08-20	3.423	2.951	10.36	5.511	3.602	3.897	3.143	12.03	2.761
2023-08-21	3.441	3.039	10.11	5.037	3.36	4.262	5.016	11.81	2.861
2023-08-22	3.536	2.988	11.04	4.945	3.139	4.407	7.938	12.76	2.885
2023-08-23	3.614	2.912	14.14	4.986	2.993	4.365	11.17	12.61	2.9
2023-08-24	3.597	2.725	18.52	5.016	2.989	4.176	14.01	11.46	2.863
2023-08-25	3.518	2.571	21.44	4.873	2.956	3.865	15.28	10.38	2.847
2023-08-26	3.282	2.331	21.65	4.8	2.866	3.565	15.5	10.02	2.915
2023-08-27	3.026	2.04	19.77	4.743	3.861	3.274	14.49	9.946	3.043
2023-08-28	2.767	1.774	17.27	4.74	4.423	3.101	12.83	9.783	3.144
2023-08-29	2.418	1.604	14.86	4.76	4.239	2.981	11.34	9.626	3.24
2023-08-30	2.424	1.64	12.76	4.675	4.649	2.948	10.24	9.484	3.225
2023-08-31	2.546	1.69	12.71	4.598	4.781	2.833	8.7	9.197	3.113
2023-09-01	2.595	1.696	14	4.649	4.53	2.802	7.3	8.794	2.952
2023-09-02	2.748	1.715	15.26	4.729	4.349	2.752	6.351	8.535	2.646
2023-09-03	3.274	1.702	16.47	4.831	4.161	2.665	5.752	8.244	2.296
2023-09-04	3.418	1.802	17.03	4.825	4.047	2.441	5.315	7.908	2.156
2023-09-05	3.449	1.903	16.81	4.795	3.952	2.335	5.007	7.651	2.184
2023-09-06	3.421	1.953	15.97	4.71	4.148	2.337	4.779	7.474	2.169
2023-09-07	3.4	2.101	14.79	6.554	6.103	2.395	4.512	7.309	2.143
2023-09-08	3.299	2.205	14.28	8.216	7.967	2.438	4.172	7.183	2.198
2023-09-09	3.145	2.28	13.53	9.33	10.22	2.291	3.835	7.206	2.355
2023-09-10	3.004	2.329	12.38	9.841	11.7	1.844	3.619	7.216	2.461
2023-09-11	2.863	2.313	11.36	9.749	12.04	8.166	3.452	7.069	2.625
2023-09-12	2.709	2.273	10.28	9.31	11.58	8.817	3.229	7.153	2.813
2023-09-13	3.477	2.321	9.357	8.574	10.94	6.021	2.838	7.216	3.036
2023-09-14	3.819	2.402	8.495	7.79	10.01	3.713	2.823	7.181	3.527
2023-09-15	3.741	2.562	7.767	7.016	9.021	4.337	2.844	7.233	3.828
2023-09-16	3.733	2.771	7.741	6.398	8.664	4.369	2.892	7.198	3.986
2023-09-17	3.756	2.95	7.635	5.865	9.015	3.678	2.911	6.999	4.018
2023-09-18	3.717	2.984	7.449	5.32	9.037	3.091	2.961	6.666	3.927
2023-09-19	3.556	2.892	7.429	4.733	8.91	2.659	3.029	6.675	3.89
2023-09-20	3.305	2.704	7.254	4.326	8.772	2.268	3.154	6.726	3.794
2023-09-21	3.181	2.543	7.708	4.394	8.542	1.853	3.21	6.735	3.679
2023-09-22	6.299	3.366	10.42	4.437	8.203	1.748	3.197	6.754	3.511
2023-09-23	7.586	3.987	11.28	4.354	7.816	1.664	3.16	6.74	3.327
2023-09-24	7.646	4.572	10.55	4.36	7.446	1.64	3.072	6.611	3.245
2023-09-25	7.442	5.201	9.603	4.418	7.058	1.638	2.956	5.961	3.799
2023-09-26	6.982	5.606	8.958	4.429	6.707	1.442	2.957	5.652	3.844
2023-09-27	6.351	5.578	8.513	4.279	6.359	1.389	3.023	5.751	3.654
2023-09-28	5.637	5.242	8.093	4.047	6.768	1.526	3.071	5.844	3.44
2023-09-29	4.961	4.748	7.71	3.968	7.429	1.6	3.086	5.897	3.23
2023-09-30	4.387	4.238	7.284	8.877	9.026	1.746	3.086	5.944	3.199
2023-10-01	3.909	3.778	7.053	12.6	14.7	1.916	3.077	5.987	3.36
2023-10-02	3.498	3.347	6.91	13.51	17.58	2.018	3.036	5.967	7.355
2023-10-03	3.172	2.968	6.691	13.17	18.24	2.069	3.004	5.877	9.381
2023-10-04	2.934	2.674	6.493	12.44	19.02	2.02	3.02	5.676	9.376
2023-10-05	2.778	2.451	6.372	11.25	18.91	1.998	3.056	6.201	9.113
2023-10-06	2.637	2.324	6.223	10.02	17.88	1.888	3.098	7.487	8.718
2023-10-07	2.541	2.204	6.252	8.825	16.39	1.79	3.122	8.872	8.082
2023-10-08	2.464	2.115	6.253	8.152	14.92	1.777	3.088	9.924	7.308
2023-10-09	2.439	2.063	6.22	7.654	13.39	1.813	3.022	10.71	6.544
2023-10-10	2.342	2.024	6.331	7.326	12.12	2.422	2.881	11.1	5.855
2023-10-11	2.29	2.023	6.535	7.048	11.1	2.833	2.757	12.41	5.507
2023-10-12	2.253	2	6.732	6.675	10.23	3.093	2.608	13.04	5.136
2023-10-13	3.013	1.964	6.882	6.298	9.491	3.238	2.596	12.7	4.755
2023-10-14	3.117	1.93	6.961	6.274	8.948	6.138	2.606	11.99	4.495
2023-10-15	2.852	1.901	7.001	6.006	9.081	7.606	2.641	11.33	4.355
2023-10-16	2.633	1.907	7.021	5.611	8.854	7.769	2.632	10.74	4.229
2023-10-17	2.563	1.887	7.031	5.292	8.399	7.588	2.57	10.06	4.11
2023-10-18	2.76	1.837	6.967	5.018	7.901	7.12	2.471	9.375	3.96
2023-10-19	3.443	1.83	6.859	4.753	12.32	6.458	2.424	8.791	3.87
2023-10-20	4.413	1.82	6.704	4.498	14.63	5.686	2.43	8.3	3.81
2023-10-21	5.198	1.861	6.521	4.235	14.4	4.954	2.442	7.891	3.725
2023-10-22	6.854	1.91	6.337	4.02	13.14	4.329	2.442	11.32	3.608
2023-10-23	7.145	1.96	6.171	3.949	11.93	3.827	2.445	12.68	3.502
2023-10-24	6.562	2.014	5.98	3.939	11.24	3.43	2.499	12.73	3.39
2023-10-25	5.904	2.048	5.76	3.955	10.68	3.105	2.534	12.74	3.346
2023-10-26	5.347	2.042	5.633	3.951	10.08	2.868	2.573	12.59	3.319
2023-10-27	7.395	2.001	5.668	3.945	9.48	2.691	2.619	12.16	3.393
2023-10-28	8.943	2.006	5.657	3.983	8.952	2.552	2.647	11.53	3.419
2023-10-29	12.87	1.969	5.65	3.965	8.486	2.444	2.636	10.88	3.531
2023-10-30	16.67	1.919	5.635	3.969	8.083	2.372	2.629	10.23	4.741
2023-10-31	21.1	1.88	5.624	3.983	7.743	2.34	2.666	9.62	5.525
2023-11-01	25.6	1.838	5.561	3.983	7.457	2.289	2.734	9.077	6.052
2023-11-02	28.92	1.746	5.448	3.955	7.209	2.221	2.877	8.628	6.676
2023-11-03	29.96	1.696	5.376	3.886	7.036	2.263	2.973	8.263	7.29
2023-11-04	28.59	1.675	5.495	3.841	6.897	2.305	3.023	7.981	7.68
2023-11-05	25.73	1.651	5.725	3.77	6.767	2.331	3.069	7.78	8.029
2023-11-06	22.45	1.654	5.943	3.681	6.684	2.371	3.106	7.635	7.972
2023-11-07	19.42	1.652	6.376	3.594	6.802	2.397	3.09	7.557	7.612
2023-11-08	19.86	1.81	7.133	3.544	6.777	2.4	5.394	7.49	7.204
2023-11-09	19.55	1.894	7.975	3.503	7.346	2.389	20.77	7.418	6.892
2023-11-10	18.95	1.948	8.623	3.473	7.54	3.075	26.63	7.37	6.649
2023-11-11	20.75	3.69	8.898	3.467	7.508	3.701	24.81	7.409	6.461
2023-11-12	22.13	5.405	8.832	3.424	7.494	4.399	22.28	7.559	6.344
2023-11-13	22.62	6.506	8.544	3.422	7.467	5.261	20	7.902	6.276
2023-11-14	22.6	6.977	8.152	3.429	7.402	6.056	17.55	8.338	6.241
2023-11-15	22.34	9.062	7.795	3.445	8.467	6.545	15.04	9.623	6.313
2023-11-16	22.52	9.935	7.463	3.451	9.075	6.627	12.77	10.53	6.358
2023-11-17	22.49	9.778	7.161	3.439	9.229	6.387	10.94	11.44	6.438
2023-11-18	21.6	9.553	6.887	3.392	18.14	6.065	9.548	12.36	6.53
2023-11-19	20.4	9.651	6.636	3.324	22.2	5.72	8.44	13.15	6.599
2023-11-20	21.38	9.671	6.404	3.284	25.6	5.431	7.533	13.61	6.595
2023-11-21	21.5	10.14	6.205	3.25	30.46	5.235	6.831	15.16	6.574
2023-11-22	20.86	11.05	6.039	3.258	32.89	6.223	6.275	17.95	7.482
2023-11-23	20.21	11.81	5.897	3.263	36.11	6.844	5.814	21.18	7.997
2023-11-24	19.59	11.98	5.754	3.218	37.02	7.037	5.437	25.12	9.258
2023-11-25	18.9	11.49	5.636	3.134	35.86	7.072	5.151	27.82	10.34
2023-11-26	18.28	10.56	5.522	3.072	34.19	6.915	4.925	29.92	11.04
2023-11-27	17.71	9.517	5.403	3.024	32.18	9.271	4.761	31.3	11.29
2023-11-28	17.07	8.538	5.235	2.99	30.01	10.88	5.305	31.89	11.25
2023-11-29	16.41	7.692	5.125	2.964	27.86	11.49	5.806	31.89	11.03
2023-11-30	15.83	6.997	4.966	2.928	26.02	11.82	6.122	31.2	11.27
2023-12-01	15.37	6.435	4.863	2.911	24.6	11.56	6.44	29.8	11.64
2023-12-02	14.99	5.982	4.763	2.893	23.4	10.82	6.703	28.16	11.94
2023-12-03	14.62	5.617	4.653	2.827	22.51	9.858	6.886	26.66	12.01
2023-12-04	14.29	5.291	4.587	2.783	21.79	8.9	7.039	25.32	11.71
2023-12-05	13.98	5.015	4.512	2.763	21.15	8.095	7.384	24.16	11.11
2023-12-06	13.68	4.803	4.443	2.683	20.72	7.943	8.007	23.14	10.4
2023-12-07	13.42	4.621	4.345	2.656	20.68	7.709	8.38	22.24	9.657
2023-12-08	13.17	4.464	4.265	2.748	20.6	7.368	8.557	21.45	8.973
2023-12-09	12.92	4.331	4.225	2.776	20.58	7.057	8.604	20.83	8.393
2023-12-10	12.7	4.213	4.186	2.805	20.57	6.709	8.494	20.3	7.928
2023-12-11	12.48	4.106	4.069	2.82	20.51	6.277	8.248	19.83	7.556
2023-12-12	12.21	4.002	4.034	2.801	20.37	5.788	7.908	19.41	7.255
2023-12-13	12.28	3.894	4.192	2.731	21.01	5.295	7.528	19.02	7.017
2023-12-14	12.66	3.792	8.142	3.724	21.09	4.85	7.142	18.66	6.817
2023-12-15	13.49	3.694	36.69	10.79	23.07	4.472	6.779	18.34	6.65
2023-12-16	14.51	3.601	74.81	19.91	23.72	4.159	6.444	18.02	6.507
2023-12-17	15.16	3.533	96.31	26.05	24.58	3.9	6.211	17.71	6.378
2023-12-18	15.16	3.467	106.4	30.03	25.46	3.678	6.04	17.4	6.261
2023-12-19	14.57	3.399	115.5	36.8	26.1	3.489	9.746	17.11	6.149
2023-12-20	13.65	3.337	115.3	40.41	26.64	3.331	13.45	16.81	6.047
2023-12-21	12.71	3.283	108.3	40.98	27	3.206	15.66	16.54	5.947
2023-12-22	11.94	3.229	100.8	43.54	27.18	3.103	17.44	16.24	5.857
2023-12-23	11.27	3.174	91.92	43.57	27.15	3.01	18.73	15.97	5.762
2023-12-24	10.8	3.104	82.52	41.33	26.94	2.927	19.24	15.69	5.671
2023-12-25	10.36	3.024	73.76	38.03	26.56	2.841	19.08	15.45	5.587
2023-12-26	16.88	2.954	65.9	34.17	26.09	2.763	18.52	15.2	5.502
2023-12-27	18.79	2.889	58.95	30.07	25.7	2.692	17.67	14.91	5.416
2023-12-28	15.53	2.833	52.89	26.12	25.29	2.626	18.58	14.64	5.331
2023-12-29	12.18	2.787	47.64	22.61	24.87	2.568	19.2	14.38	5.68
2023-12-30	10.22	2.743	43.15	19.64	24.48	6.613	20.16	14.11	5.515
2023-12-31	9.25	2.674	39.37	17.21	24.23	12.35	20.77	13.89	5.26
2024-01-01	8.742	2.617	36.22	15.26	23.87	15.4	22.88	13.65	5.169
2024-01-02	8.404	2.534	33.6	13.72	23.54	17.78	24.35	13.39	5.154
2024-01-03	8.141	2.456	31.42	12.47	23.12	20.99	26.38	13.14	5.131
2024-01-04	7.917	2.409	29.61	11.45	22.76	22.99	30.56	12.88	5.063
2024-01-05	7.726	2.369	28.09	10.65	23.04	25.76	32.72	12.64	4.958
2024-01-06	7.554	2.339	26.78	9.998	23.17	26.78	32.94	12.43	4.83
2024-01-07	7.393	2.32	25.66	9.427	23.24	29.52	32.19	12.22	4.704
2024-01-08	7.249	2.3	24.65	8.934	23.56	31.96	30.75	12	4.596
2024-01-09	7.113	2.275	38.94	10.78	23.81	31.47	28.91	11.78	4.497
2024-01-10	6.977	2.244	53.18	23.38	25.6	29.73	26.98	11.57	4.408
2024-01-11	6.829	2.209	62.12	34.28	26.49	27.77	27.47	11.35	4.327
2024-01-12	6.665	2.171	69.48	43.2	26.88	25.62	27.94	11.14	4.257
2024-01-13	6.51	2.132	75.15	53.08	27.18	23.27	30.81	10.93	4.189
2024-01-14	6.353	2.094	76.49	59.93	27.39	20.88	33.67	10.73	4.122
2024-01-15	6.194	2.057	74.53	66.98	27.45	18.69	35.91	10.53	4.049
2024-01-16	6.067	2.008	69.84	67.55	29.68	16.79	37.22	10.33	3.97
2024-01-17	5.95	1.971	64.09	65.44	34.69	15.38	37.01	10.14	3.896
2024-01-18	5.82	1.938	58.51	62.49	35.88	14.13	35.3	9.954	3.827
2024-01-19	5.697	1.879	53.74	59.28	35.17	13.16	32.78	9.78	3.764
2024-01-20	5.577	1.83	50.99	56.64	34.78	12.36	30.14	9.609	3.701
2024-01-21	5.461	1.8	48.22	55.19	34.8	11.71	27.77	9.444	3.64
2024-01-22	5.346	1.774	45.41	52.24	35.92	11.11	25.78	9.282	3.586
2024-01-23	5.245	1.746	43.09	48.68	36.18	14.41	24.13	9.122	3.533
2024-01-24	5.139	1.717	41.13	45.51	37.67	16.22	22.76	8.945	3.478
2024-01-25	5.027	1.679	39.42	42.71	37.89	16.89	21.65	8.763	3.41
2024-01-26	4.9	1.587	37.81	40.09	37.34	17.56	20.71	9.006	3.342
2024-01-27	4.803	1.458	36.36	37.6	36.99	18.01	19.88	9.388	3.432
2024-01-28	4.71	1.422	35.01	35.22	36.84	19.64	19.16	9.61	3.519
2024-01-29	4.561	1.336	33.78	38.21	36.72	19.83	18.57	15.39	4.658
2024-01-30	4.458	1.278	32.65	37.99	36.45	19.06	17.99	22.44	5.798
2024-01-31	5.312	1.261	31.64	35.38	36.11	18.26	18.28	27.19	6.822
2024-02-01	6.363	1.268	30.77	32.94	35.72	17.5	22.85	29.8	7.474
2024-02-02	9.623	1.303	29.99	30.96	35.25	16.72	26.47	30.82	7.607
2024-02-03	12.52	1.416	29.23	29.24	34.84	15.97	28.96	30	7.239
2024-02-04	18.7	1.547	28.53	27.73	34.32	15.32	30.72	27.24	6.535
2024-02-05	42.89	1.816	27.87	26.4	33.88	14.95	30.99	23.7	5.716
2024-02-06	65.93	2.282	27.2	25.3	33.56	14.66	29.5	20.25	4.954
2024-02-07	85.89	3.075	26.6	24.4	33.87	14.44	26.97	17.39	4.33
2024-02-08	95.74	4.081	25.96	23.62	34.19	14.2	24.15	15.15	3.849
2024-02-09	98.08	4.913	25.37	22.95	34.29	13.86	21.61	13.39	3.499
2024-02-10	94.27	5.216	24.85	22.35	34.47	13.48	20.5	12.06	3.18
2024-02-11	84.47	4.978	24.32	21.84	37.94	13.07	20.46	10.98	2.869
2024-02-12	71.13	4.407	23.76	21.34	41.83	12.64	22.96	10.1	2.601
2024-02-13	57.21	3.741	23.21	20.81	43.75	12.23	31.25	9.396	2.482
2024-02-14	45.05	3.16	22.67	20.33	45.16	11.86	42.68	8.858	2.428
2024-02-15	35.53	2.691	22.14	19.82	46.32	11.55	46.46	8.418	2.36
2024-02-16	28.43	2.327	21.67	19.38	46.95	11.25	46.77	8.07	2.286
2024-02-17	23.19	2.049	21.26	19.03	46.61	10.94	47.76	7.758	2.235
2024-02-18	19.3	1.841	20.82	18.66	45.49	10.65	51.05	7.455	2.16
2024-02-19	16.36	1.691	20.37	18.3	43.93	10.36	52.81	7.233	2.112
2024-02-20	14.14	1.557	19.94	17.97	42.23	10.07	52.85	7.1	2.065
2024-02-21	12.44	1.442	19.49	17.62	40.55	9.815	51.75	17.13	2.039
2024-02-22	11.67	1.282	19.08	17.25	39.02	9.578	49.79	33.18	2.022
2024-02-23	11.42	1.182	18.76	16.89	37.66	9.358	48.01	44.12	2.074
2024-02-24	11.66	1.182	18.41	16.55	36.45	9.153	48.2	51.46	2.237
2024-02-25	12.11	1.183	17.96	16.2	35.48	8.96	48.44	56.49	2.558
2024-02-26	12.32	1.142	17.44	15.79	34.67	8.768	47.24	57.61	2.961
2024-02-27	12.02	1.097	17.03	15.44	34.38	8.572	46.23	54.35	3.231
2024-02-28	11.37	1.093	16.63	15.04	33.83	8.34	45.84	48.2	3.246
2024-02-29	10.43	0.9373	16.3	14.67	33.36	8.089	45.46	46.51	3.051
2024-03-01	9.419	0.7376	15.94	14.29	32.82	7.862	44.71	41.61	2.769
2024-03-02	8.561	0.7043	15.56	13.91	32.43	7.663	43.53	35.97	6.962
2024-03-03	7.874	0.7179	15.16	14.65	31.97	7.486	42.16	31.85	12.43
2024-03-04	7.315	0.6888	14.84	25.09	31.59	7.291	40.64	29.96	19.37
2024-03-05	6.79	0.6533	14.63	36.44	31.12	7.097	39.19	29.74	33.01
2024-03-06	6.316	0.6471	14.74	41.58	30.51	6.908	37.79	30.83	47.39
2024-03-07	5.917	0.6401	15.16	43.57	29.8	6.717	37.55	32.75	61.03
2024-03-08	6.293	0.5964	15.41	43.59	29.05	6.518	36.99	34.74	71.47
2024-03-09	6.709	0.5814	15.28	41.11	29.76	6.335	36.12	36.48	76.36
2024-03-10	6.883	0.5612	14.77	36.64	29.37	6.154	35.14	37.64	75.99
2024-03-11	7.383	0.5596	14.07	31.4	27.98	5.997	34.05	37.56	71.67
2024-03-12	8.85	0.5608	13.52	27.72	26.49	5.867	32.95	36.75	65.83
2024-03-13	10.58	0.579	13.07	28.4	25.36	14.57	31.92	35.96	59.91
2024-03-14	12.12	0.5854	12.67	32.66	24.47	25.53	31.04	34.96	54.17
2024-03-15	12.87	0.5735	12.3	37.85	23.66	33.13	30.28	33.89	48.59
2024-03-16	12.59	0.5264	11.96	41.35	23.36	40.18	29.54	32.87	43.49
2024-03-17	11.65	0.474	11.59	44.65	23.01	46.99	28.88	31.74	38.85
2024-03-18	10.54	0.4578	11.28	49.84	22.41	56.27	28.25	30.71	34.53
2024-03-19	9.454	0.4343	11	55.88	21.77	59.63	27.61	29.59	30.79
2024-03-20	9.59	0.4321	10.73	62.6	21.21	57.89	27.05	28.72	27.64
2024-03-21	10.75	0.4218	10.44	69	20.87	53.86	26.43	27.9	25.05
2024-03-22	11.04	0.389	10.18	76.37	20.54	48.89	25.68	27.03	23.1
2024-03-23	10.63	0.3767	9.918	84.65	20.62	43.84	26.81	26.23	21.2
2024-03-24	10.2	0.3178	9.696	82.48	20.48	39.79	33.65	25.56	19.46
2024-03-25	10.34	0.3247	9.757	77.09	19.85	35.62	37.89	24.68	18.25
2024-03-26	10.31	0.3291	9.614	75.89	19.08	31.79	39.89	23.88	17.51
2024-03-27	10.92	0.3439	15.84	71.58	18.71	28.64	41.44	23.24	16.5
2024-03-28	12.25	0.4028	25.67	66.91	18.47	26.04	42.74	22.56	15.41
2024-03-29	24.87	0.5311	47.61	63.93	18.09	23.89	42.89	22.01	14.41
2024-03-30	34.3	0.7598	104.7	63.94	17.81	21.92	41.28	21.83	13.96
2024-03-31	42.14	1.094	187.6	66.29	17.33	20.39	38.71	21.74	13.61
2024-04-01	48.08	1.507	255.3	68.56	17.07	18.77	36.41	22.5	13.08
2024-04-02	51.03	1.9	292.2	70.02	16.83	17.77	33.94	23.91	12.43
2024-04-03	51.59	2.226	303.4	69.32	17.39	16.9	31.47	24.57	11.89
2024-04-04	50.98	2.593	291.6	66.72	17.26	15.79	29.33	25.15	11.72
2024-04-05	50.61	3.45	263.8	63.39	17.02	14.99	29.01	25.56	11.45
2024-04-06	51.45	5.062	232.1	60.22	16.87	14.58	28.38	25.72	11.04
2024-04-07	53.91	7.436	198.3	57.01	16.74	14.13	28.38	25.69	10.66
2024-04-08	60.01	10.31	168	53.77	16.6	13.72	28.69	25.36	10.26
2024-04-09	69.41	13.95	142.7	50.69	16.33	13.28	28.86	24.68	9.819
2024-04-10	85.5	22.82	122.5	48.1	15.87	12.83	28.64	23.86	9.383
2024-04-11	104.1	35.17	106.3	45.73	15.38	14.59	28.1	24.44	9.24
2024-04-12	110.8	48.09	94.04	43.4	16.4	16.55	27.27	25.88	9.045
2024-04-13	118.7	57.89	83.78	41.46	23.84	17.92	26.22	25.71	8.681
2024-04-14	121.1	63.09	75.12	40.16	26.67	18.49	25.39	24.85	8.358
2024-04-15	119.2	66.67	68.5	38.92	27.71	18.55	25.83	24.04	7.959
2024-04-16	115.5	68.11	62.95	37.61	28.65	21.85	26.12	23.38	7.505
2024-04-17	113	67.62	58.49	36.95	29.45	23.41	25.5	22.81	7.138
2024-04-18	110.9	60.12	54.7	36.36	29.39	24.35	25.14	22.77	6.987
2024-04-19	106.3	50.57	51.94	35.73	28.54	24.74	25.04	22.9	6.863
2024-04-20	101.1	42.57	50.22	34.99	27.17	24.86	25.04	22.84	6.818
2024-04-21	96.18	36.95	48.42	34.09	25.66	24.84	24.66	22.7	6.696
2024-04-22	91.63	32.72	53.35	33.59	24.2	24.32	23.65	22.35	6.501
2024-04-23	88.21	29.23	55.21	32.75	22.77	24.54	22.38	22.89	6.228
2024-04-24	84.57	26.41	55.21	31.79	21.51	23.68	21.18	29.63	5.871
2024-04-25	86.6	24.02	57.31	30.83	20.35	22.7	20.18	32.86	5.505
2024-04-26	83.72	21.93	57.14	30.59	19.24	21.6	19.1	33.69	5.016
2024-04-27	78.31	20.04	55.58	30.09	18.33	20.85	17.97	34.84	4.601
2024-04-28	73.27	18.36	53.86	29.89	17.51	22.54	17.41	36.02	4.399
2024-04-29	72.32	17.7	51.63	29.51	16.98	26.09	17.19	36.79	4.378
2024-04-30	70.29	16.84	49.33	28.8	16.62	29.06	16.75	36.99	4.369
2024-05-01	68.7	16.56	47	27.88	16.24	31.5	16.09	36.43	4.411
2024-05-02	67.44	16.22	44.87	26.94	15.94	33.81	15.81	35.5	4.442
2024-05-03	66.47	15.86	42.86	25.75	15.74	34.87	15.66	34.28	4.336
2024-05-04	67	15.65	40.95	24.64	15.42	34.49	15.18	32.59	4.041
2024-05-05	68.77	15.26	39.13	23.85	15.26	33.11	14.44	31.25	3.885
2024-05-06	69.5	15.02	37.49	23.02	15.01	31.53	13.9	30.33	3.809
2024-05-07	69.67	14.71	35.94	22.39	14.77	29.93	13.47	29.06	3.766
2024-05-08	69.09	14.29	34.53	21.73	14.68	27.99	13.06	27.69	3.722
2024-05-09	68.1	13.69	33.42	21.11	14.8	26.38	12.66	26.82	4.143
2024-05-10	66.43	13.06	32.37	20.4	14.54	25.46	12.15	26.05	4.469
2024-05-11	64.21	12.47	32.38	19.95	14.51	24.25	12.08	25.21	4.879
2024-05-12	62.4	11.98	32.01	19.3	14.48	22.8	11.71	24.42	5.24
2024-05-13	60.33	11.58	31.3	18.87	13.79	22.49	11.11	23.66	5.528
2024-05-14	57.78	11.4	31	18.42	13	22.57	11.02	22.83	5.606
2024-05-15	55.12	11.34	30.39	17.87	12.48	22.33	10.99	22.07	5.547
2024-05-16	53.16	11.3	29.96	17.64	12.25	24.38	10.67	24.26	6.061
2024-05-17	51.58	11.1	29.06	17.16	11.98	24.61	10.25	25.27	6.422
2024-05-18	49.92	10.99	28.14	16.48	12	23.51	9.878	25.51	7.122
2024-05-19	48.24	10.71	26.96	15.87	11.5	22.46	9.344	25.71	7.918
2024-05-20	46.71	10.36	25.88	15.22	14.62	21.5	9.136	26.14	8.691
2024-05-21	45.27	10.14	24.64	14.48	15.17	20.08	9.062	25.86	9.4
2024-05-22	43.85	9.774	23.74	14.03	13.68	18.61	9.063	24.72	9.701
2024-05-23	43.33	9.39	22.82	13.67	12.47	18.86	9.156	23.29	10.23
2024-05-24	42.41	9.669	22.02	13.42	11.57	18.99	9.158	21.96	10.4
2024-05-25	41.13	10.1	21.21	12.93	11.18	18.88	8.935	21.21	12.06
2024-05-26	40.51	9.95	20.96	12.84	10.56	18.53	8.416	20.41	13.33
2024-05-27	43.27	9.607	20.69	12.91	9.999	17.99	7.817	19.18	13.37
2024-05-28	42.39	9.185	20.31	12.71	9.502	17.42	7.056	17.87	13.33
2024-05-29	40.7	8.746	20.15	12.65	9.296	16.71	6.5	17.44	13.03
2024-05-30	39.84	8.424	19.54	12.37	9.371	16.08	6.54	16.64	12.54
2024-05-31	38.89	7.9	18.84	11.8	9.315	15.46	6.569	16.09	11.96
2024-06-01	38.66	8.79	18.51	11.31	9.268	15.93	6.945	15.45	11.51
2024-06-02	38.11	10.79	17.85	11.22	9.26	15.56	8.25	15.38	11.04
2024-06-03	40.86	12.43	17.36	11.21	8.978	14.58	11.56	14.91	11.05
2024-06-04	41.78	13.66	16.64	10.93	8.571	13.87	12.81	14.49	10.83
2024-06-05	40.19	14.76	16.18	10.53	7.882	13.57	16.37	18.17	10.46
2024-06-06	38.01	15.88	16.47	10.5	7.854	13.32	27.86	19.22	10.2
2024-06-07	39.83	16.83	16.36	10.38	7.725	12.94	32.38	18.72	10.09
2024-06-08	41.91	17.69	16.06	10.29	7.606	13.15	30.39	17.13	10.03
2024-06-09	51.97	17.7	15.41	10.05	7.824	21.88	27.11	16.06	9.912
2024-06-10	65.65	27.94	14.87	9.59	8.069	23.37	23.85	15.31	9.868
2024-06-11	72.7	39.37	14.13	9.101	8.274	20.58	21.72	14.33	9.869
2024-06-12	76.25	42.58	13.58	8.444	8.333	17.82	18.53	13.41	9.889
2024-06-13	78.1	42.95	13.11	8.302	8.315	16.2	16.3	12.7	9.89
2024-06-14	76.93	42.59	13.22	8.392	8.461	15.01	15.27	11.89	9.843
2024-06-15	73.21	42.82	13.31	8.956	8.393	13.66	15.47	11.24	9.611
2024-06-16	68.51	43.63	13.06	9.188	8.285	12.34	16.85	10.86	10.81
2024-06-17	63.45	41.96	12.31	9.317	8.214	11.49	16.96	10.35	11.19
2024-06-18	59.56	38.75	11.74	9.315	7.95	10.95	22.22	10.18	11.58
2024-06-19	55.51	35.63	11.24	9.095	7.589	10.34	24.2	10.37	11.48
2024-06-20	52.42	33.56	11.17	8.76	7.091	9.9	24.17	10.62	11.21
2024-06-21	50.23	31.76	11.12	8.547	6.62	9.642	24.28	10.85	11.71
2024-06-22	47.96	30.09	10.92	8.364	6.148	9.479	24.22	11.55	12.4
2024-06-23	45.87	28.17	10.43	8.183	5.971	9.454	23.74	11.36	12.69
2024-06-24	43.82	28.21	10.32	8.416	6.225	9.337	22.7	11.07	12.51
2024-06-25	42.41	28.17	10.59	8.369	6.957	9.329	21.23	10.67	12.08
2024-06-26	41.17	27.1	10.99	11.62	7.585	9.108	19.74	10.07	11.62
2024-06-27	39.96	26.01	10.91	12.57	8.02	8.841	17.96	9.178	11.29
2024-06-28	38.88	26.92	10.67	12.45	8.012	8.461	16.94	8.946	11.13
2024-06-29	37.76	26.99	10.81	12.84	7.803	7.923	16.71	9.086	10.94
2024-06-30	36.68	26.14	10.74	13.65	9.826	7.78	16.11	9.122	10.76
2024-07-01	35.9	25	10.59	14.08	11.33	7.83	15.45	9.037	10.75
2024-07-02	35.1	24.77	10.47	14.42	12.45	7.762	15.12	8.888	10.49
2024-07-03	34.42	24.18	10.4	14.72	13.07	7.676	15.35	8.7	10.01
2024-07-04	33.12	23.27	10.24	14.75	12.63	7.175	15.13	8.339	9.557
2024-07-05	32.66	22.11	9.748	14.1	11.71	6.585	15.06	8.278	9.199
2024-07-06	32.65	21.1	9.019	13.39	11.21	6.261	14.75	8.177	9.031
2024-07-07	32.36	23.81	8.588	13.06	10.45	5.778	14.22	8.158	8.85
2024-07-08	32.25	23.83	8.178	12.61	9.541	5.874	14.23	7.809	8.59
2024-07-09	32.01	22.06	8.147	12.32	8.662	5.928	13.9	9.712	8.451
2024-07-10	31.22	20.19	8.436	11.56	8.287	5.999	13.47	11.94	8.321
2024-07-11	30.12	20.17	8.865	11.2	9.994	6.104	13.03	14.19	8.109
2024-07-12	30.31	20.13	9.034	11.07	14.52	6.122	12.58	14.79	7.626
2024-07-13	29.98	24.09	9.078	10.8	21.91	6.049	12.18	15.48	7.153
2024-07-14	28.76	24.73	9.039	10.43	29.7	5.877	11.73	16.74	6.697
2024-07-15	27.45	22.78	8.92	10.13	35.24	5.509	11.28	18.99	6.227
2024-07-16	26.99	20.97	8.558	9.872	37.55	5.336	11.2	22.87	6.057
2024-07-17	26.92	19.64	7.871	9.485	36.7	5.455	11.29	24.9	6.007
2024-07-18	25.88	18.53	6.851	9.091	34.83	5.489	11.3	24.64	5.906
2024-07-19	24.81	17.65	6.573	8.661	33.57	5.506	11.34	23.49	5.812
2024-07-20	23.77	16.9	6.636	8.271	32.3	5.434	11.21	21.59	5.455
2024-07-21	22.75	16.93	6.626	7.87	30.99	5.354	11	19.12	4.827
2024-07-22	21.76	17.35	6.535	7.749	29.66	5.37	10.64	35.26	10.78
2024-07-23	20.93	17.91	6.242	7.453	27.63	9.926	10.28	41.17	11.2
2024-07-24	20.47	18.4	5.874	7.188	25.06	12.3	9.803	35.44	8.931
2024-07-25	20.76	18.54	5.794	7.073	22.16	13.07	9.357	28.31	7.261
2024-07-26	20.47	18.14	5.636	6.701	19.25	13.39	9.17	23.11	6.254
2024-07-27	20.22	19.59	5.43	6.234	17.5	13.59	8.857	19.97	5.79
2024-07-28	19.59	22.8	5.123	5.666	16.03	13.16	8.404	17.66	5.398
2024-07-29	18.97	23.56	4.862	5.431	15.11	12.26	7.922	16.22	5.086
2024-07-30	18.62	22.38	6.796	5.445	14.07	11.41	7.82	15.49	4.502
2024-07-31	18.04	20.73	11.43	5.468	13.11	10.75	7.869	15.58	5.238
2024-08-01	18.91	19.16	14.5	5.406	12.46	9.983	7.896	16.29	7.25
2024-08-02	18.5	17.63	12.91	5.113	11.88	10.12	7.875	17.4	8.345
2024-08-03	17.64	16.49	10.02	4.658	11.38	10.53	7.886	18.08	9.608
2024-08-04	16.87	15.19	8.105	4.654	10.91	11.38	7.944	18.48	9.751
2024-08-05	16.36	13.9	6.942	4.631	11	12.86	7.786	17.68	9.318
2024-08-06	15.99	12.86	6.202	4.873	10.75	13.82	7.432	16.6	9.143
2024-08-07	16.02	12.34	5.676	4.982	10.24	14.64	6.85	15.46	8.506
2024-08-08	16.17	11.96	5.283	4.954	9.71	14.99	6.447	14.26	7.655
2024-08-09	16.23	11.79	4.832	4.831	9.198	14.74	5.882	13.23	6.891
2024-08-10	15.84	11.77	4.281	4.287	8.838	13.56	5.948	12.37	6.201
2024-08-11	15.76	11.43	3.83	3.685	8.522	12.58	5.949	11.8	5.57
2024-08-12	15.68	11.1	3.783	3.526	8.153	11.59	6.1	11.4	4.88
2024-08-13	15.08	11.23	3.998	3.588	8.091	11.13	6.146	11.31	4.054
2024-08-14	14.29	11.08	4.148	3.61	7.777	10.61	6.181	11.52	4.316
2024-08-15	13.87	10.76	4.244	3.533	7.711	9.889	6.099	11.24	4.611
2024-08-16	13.72	10.35	8.494	3.634	7.784	9.09	6.069	11.37	4.63
2024-08-17	13.85	10.01	11.09	3.787	7.913	8.665	6.004	12.5	4.378
2024-08-18	14.06	9.706	11.24	4.048	8	8.231	5.866	13.84	4.164
2024-08-19	13.98	9.661	10.61	4.157	7.841	7.793	5.701	14.92	3.788
2024-08-20	13.94	9.879	10.31	4.261	7.284	7.403	5.679	15.07	3.376
2024-08-21	14.09	10	9.969	4.235	6.745	7.036	5.715	15.37	2.905
2024-08-22	14.04	9.887	9.353	4.083	6.311	6.68	5.792	15.44	2.982
2024-08-23	14.56	9.534	15.47	3.776	6.028	6.365	6	15.82	3.072
2024-08-24	14.84	8.824	32.84	3.625	5.621	5.973	6.116	15.69	3.103
2024-08-25	14.57	8.514	36.55	3.501	5.672	5.468	6.243	14.96	3.124
2024-08-26	14.13	8.373	31.55	3.462	5.572	5.042	6.214	14.14	3.128
2024-08-27	13.38	8.254	26.31	3.345	5.474	4.565	6.105	13.28	3.046
2024-08-28	12.3	8.086	22.06	3.351	5.416	4.224	5.784	12.64	2.862
2024-08-29	11.69	8.169	18.22	3.352	5.564	3.984	5.35	11.87	2.454
2024-08-30	11.43	8.19	15.11	3.339	5.597	3.821	4.973	11.45	2.599
2024-08-31	11.33	8.221	17.24	3.316	5.728	3.62	4.611	20.02	2.766
2024-09-01	11.33	8.299	18.05	3.864	5.811	3.605	4.393	26.73	2.937
2024-09-02	11.31	8.426	18.93	4.321	5.737	3.72	4.458	31.65	3.555
2024-09-03	11.26	8.517	20.46	4.652	5.381	3.808	4.522	36.52	3.726
2024-09-04	11.24	8.509	20.89	5.064	4.518	4.622	4.545	40.4	3.648
2024-09-05	11.21	8.378	19.54	5.453	4.117	6.291	4.497	42.97	3.553
2024-09-06	10.77	8.136	16.92	5.746	4.157	8.333	4.501	43.78	3.438
2024-09-07	10.28	7.656	14.49	5.799	4.234	10.08	4.486	42.75	3.26
2024-09-08	10.07	7.482	12.41	7.842	4.252	11.2	4.36	40.54	3.015
2024-09-09	9.924	7.452	10.46	8.83	3.984	11.34	4.362	37.92	2.703
2024-09-10	9.625	7.272	8.589	8.891	3.684	10.78	4.247	35.09	2.289
2024-09-11	9.308	7.47	7.02	8.975	3.716	10.77	3.811	32.18	2.289
2024-09-12	9.349	7.506	5.928	9.191	3.837	10.15	3.854	29.72	2.412
2024-09-13	9.822	7.328	5.357	9.277	3.897	9.607	3.913	27.35	2.491
2024-09-14	10.04	7.101	5.074	8.996	3.877	9.532	3.924	25.29	2.58
2024-09-15	9.994	6.705	4.919	8.397	3.715	9.538	3.917	23.73	2.646
2024-09-16	9.823	6.366	4.823	7.671	3.611	9.213	3.876	22.42	2.678
2024-09-17	9.566	6.714	4.701	6.974	3.562	8.473	3.797	21.41	2.671
2024-09-18	9.269	6.721	4.585	6.341	3.581	7.502	3.643	20.57	2.616
2024-09-19	8.927	6.573	4.373	5.75	3.595	6.564	3.302	19.73	2.488
2024-09-20	8.794	6.468	4.182	5.237	3.606	5.725	3.131	19.1	2.333
2024-09-21	8.738	6.367	3.966	4.823	3.624	5.064	3.205	18.38	2.202
2024-09-22	8.667	6.187	3.764	4.474	3.656	4.541	3.26	17.85	2.179
2024-09-23	8.526	5.962	3.644	4.207	3.653	4.123	3.456	17.55	2.147
2024-09-24	8.341	5.826	3.564	3.996	3.637	3.663	3.65	17.3	2.123
2024-09-25	8.792	5.752	3.502	3.806	3.617	3.517	3.915	17.14	2.184
2024-09-26	9.122	5.691	3.365	3.627	3.565	3.477	3.988	17.09	2.23
2024-09-27	9.362	5.639	3.259	3.402	3.519	3.512	4.021	17.78	2.194
2024-09-28	9.588	5.653	3.182	3.138	3.311	3.512	4.006	18.45	2.81
2024-09-29	10.23	5.666	3.113	2.915	3.055	3.378	3.92	17.97	2.88
2024-09-30	10.66	5.648	3.059	2.711	2.939	3.291	3.829	17.12	2.606
2024-10-01	10.68	5.544	3.011	2.604	2.816	3.208	3.708	16.57	2.471
2024-10-02	10.42	5.296	2.95	2.626	2.925	3.184	3.612	16.39	2.417
2024-10-03	10.06	5.303	2.955	2.705	2.952	3.057	3.48	16.1	2.418
2024-10-04	9.662	5.257	2.956	2.747	2.955	3.045	3.43	15.68	2.394
2024-10-05	9.24	5.269	2.923	2.756	3.06	2.987	3.359	15.24	2.297
2024-10-06	8.846	5.657	2.892	2.704	3.1	2.952	3.258	14.74	2.082
2024-10-07	8.377	5.764	2.863	2.541	3.068	2.826	3.031	14.3	1.818
2024-10-08	7.84	5.923	2.849	2.348	3.008	2.814	2.836	13.9	1.716
2024-10-09	7.516	6.005	2.798	2.29	2.877	2.744	2.714	13.65	1.663
2024-10-10	7.588	5.942	2.755	2.256	2.765	2.774	2.731	13.4	1.682
2024-10-11	7.595	5.806	2.733	2.236	2.579	2.785	2.859	13.15	1.715
2024-10-12	7.552	5.664	2.691	2.201	2.49	2.64	2.971	12.91	1.732
2024-10-13	7.402	5.442	2.678	2.156	2.515	2.497	3.401	12.72	1.743
2024-10-14	7.183	5.056	2.665	2.159	2.533	2.289	3.763	12.59	1.763
2024-10-15	7.398	4.747	2.633	2.135	2.62	2.307	4.01	12.44	1.774
2024-10-16	9.699	4.614	2.574	2.071	2.71	2.356	4.145	12.22	1.778
2024-10-17	10.95	4.494	2.552	1.998	2.738	2.358	4.113	12.02	1.778
2024-10-18	10.98	4.392	2.558	2.001	2.752	2.34	3.956	11.84	1.761
2024-10-19	15.76	4.384	2.58	2.036	2.765	2.717	3.745	11.7	1.737
2024-10-20	18.27	4.476	2.605	2.079	2.754	2.732	3.527	11.49	1.701
2024-10-21	18.85	4.503	2.624	2.114	2.736	3.509	3.362	11.38	1.706
2024-10-22	18.61	4.507	2.616	2.138	2.69	4.611	3.244	11.24	1.706
2024-10-23	18.29	4.629	2.599	2.152	2.636	8.85	3.112	11.13	1.734
2024-10-24	20.43	5.199	2.565	2.155	2.587	15.62	3.028	10.97	1.758
2024-10-25	21.65	5.28	2.545	2.135	2.564	18.68	2.975	10.78	1.773
2024-10-26	23.27	5.066	2.54	2.102	2.542	19.72	2.908	10.68	1.779
2024-10-27	24.12	4.843	2.542	2.075	2.572	20.31	2.899	10.57	1.776
2024-10-28	23.63	4.69	2.53	2.048	2.6	20.36	2.951	10.4	1.762
2024-10-29	22.28	4.609	2.507	2.015	2.627	19.73	2.986	10.26	1.747
2024-10-30	20.5	6.331	2.465	1.968	2.636	18.68	2.99	10.04	1.744
2024-10-31	18.57	6.574	2.453	1.91	2.609	17.2	2.972	10.19	1.738
2024-11-01	16.71	5.868	2.434	1.855	2.557	17.04	2.958	10.2	1.742
2024-11-02	15.03	5.251	2.566	2.136	2.49	16.78	2.888	10.35	1.737
2024-11-03	13.48	4.855	2.775	2.831	2.453	16.32	2.768	10.39	1.726
2024-11-04	12.19	4.495	3.016	3.788	2.463	15.8	2.685	10.34	1.727
2024-11-05	11.12	4.625	3.25	4.529	2.488	15.14	2.625	10.77	1.708
2024-11-06	10.27	4.588	3.383	4.911	2.514	14.26	2.567	10.89	1.671
2024-11-07	9.626	4.352	3.359	5.029	2.532	13.28	2.516	10.8	1.633
2024-11-08	9.119	4.089	3.21	5.032	2.535	12.27	2.461	10.75	1.64
2024-11-09	8.762	4.052	3.022	4.986	2.507	11.36	2.416	10.83	1.658
2024-11-10	12.43	5.342	2.911	4.908	2.44	10.58	2.349	11.88	1.673
2024-11-11	14.81	6.555	2.835	4.812	2.364	9.911	2.369	12.28	1.695
2024-11-12	15.59	6.433	2.797	4.781	2.286	9.342	2.402	12.25	1.703
2024-11-13	15.95	5.853	2.748	4.808	2.234	8.85	2.389	12.62	1.69
2024-11-14	15.9	5.391	2.699	4.816	2.247	8.452	2.505	18.71	2.066
2024-11-15	15.29	5.082	2.622	4.749	2.274	8.099	2.632	21.71	2.239
2024-11-16	14.32	4.838	2.541	4.58	2.37	7.811	2.763	22.42	2.241
2024-11-17	13.12	4.645	2.465	4.347	2.414	7.602	2.879	22.94	2.203
2024-11-18	12.02	4.485	2.358	4.087	2.4	9.126	2.954	23.44	2.17
2024-11-19	11.03	4.347	2.326	3.854	2.391	9.911	2.97	23.52	2.123
2024-11-20	10.17	4.23	2.359	3.918	2.755	15.04	2.942	24.93	2.058
2024-11-21	9.461	5.071	2.495	4.247	2.904	18.41	2.864	25.79	1.98
2024-11-22	8.89	5.491	2.71	4.712	2.92	22.41	2.914	25.49	1.931
2024-11-23	8.459	5.227	2.954	5.127	2.945	27.24	2.92	24.96	1.894
2024-11-24	8.095	4.867	3.202	5.38	2.977	33.06	2.884	24.65	1.859
2024-11-25	8.537	4.684	3.391	5.424	3.025	36.45	2.845	24.36	1.818
2024-11-26	8.697	5.148	3.466	5.279	3.239	38.23	2.939	24	1.781
2024-11-27	8.669	6.307	3.428	5.021	3.313	41.74	4.801	23.55	1.74
2024-11-28	9.377	6.553	3.324	4.719	3.322	42.88	5.579	23.04	1.699
2024-11-29	10.73	6.372	3.194	4.424	3.883	41.84	5.527	22.5	1.631
2024-11-30	11.31	6.208	3.054	4.155	4.541	40.04	6.325	21.98	1.587
2024-12-01	11.46	6.051	2.923	3.923	5.193	38.08	6.903	21.54	1.563
2024-12-02	11.4	5.848	2.814	3.729	5.55	37.49	6.644	21.14	1.552
2024-12-03	11.09	5.621	2.722	3.564	6.248	37.01	6.172	20.81	1.541
2024-12-04	10.59	5.391	2.636	3.432	7.643	35.64	5.815	20.48	1.528
2024-12-05	9.983	5.171	2.564	3.318	9.634	34.13	5.54	20.18	1.514
2024-12-06	9.376	5.154	2.505	3.228	10.24	32.77	5.233	19.92	1.496
2024-12-07	8.841	5.23	2.46	3.148	10.18	35.05	4.879	19.6	1.47
2024-12-08	8.401	5.234	2.42	3.077	10.02	36.19	4.509	19.33	1.43
2024-12-09	8.075	5.307	2.386	3.016	9.73	35.79	4.181	19.09	1.417
2024-12-10	8.042	6.025	2.363	2.965	9.276	35.01	3.896	21.9	1.369
2024-12-11	8.115	6.219	2.322	2.92	8.684	35.21	3.662	28.69	2.069
2024-12-12	8.257	6.018	2.272	2.879	8.041	35.15	3.488	38.78	17.76
2024-12-13	8.436	7.439	2.237	2.836	7.439	34.82	3.455	45.39	27.39
2024-12-14	10.16	8.547	2.196	2.786	6.922	34.36	3.48	50.4	30.85
2024-12-15	12.05	9.028	2.16	2.733	6.503	33.81	3.563	54.65	32.35
2024-12-16	14.25	9.244	2.134	2.682	6.156	34.96	3.702	56.51	31.87
2024-12-17	15.43	10.13	2.112	2.63	5.884	34.83	3.83	55.71	29.19
2024-12-18	15.83	10.27	2.079	2.578	5.654	33.9	3.9	52.99	25.07
2024-12-19	18.75	9.955	2.04	2.519	17.38	32.94	3.958	49.36	20.61
2024-12-20	20.89	9.941	1.98	2.464	27.63	32.12	4.292	45.61	16.62
2024-12-21	21.39	9.719	2.121	2.558	34.55	36.87	4.311	42.16	13.39
2024-12-22	21.38	9.368	2.234	2.496	40.65	39.77	4.147	39.17	10.94
2024-12-23	21.11	9.004	9.489	2.459	45.54	41.07	4.089	37.27	9.122
2024-12-24	20.52	8.649	12.45	2.454	46.36	41.46	4.114	49.52	7.739
2024-12-25	19.58	8.282	12.76	2.457	43.55	41.73	4.424	53.18	6.722
2024-12-26	18.42	7.902	12.01	2.45	39.05	41.84	4.615	52.03	5.921
2024-12-27	17.26	7.58	10.71	2.447	34.25	43.24	4.679	50.23	5.44
2024-12-28	16.38	7.312	9.431	2.436	29.76	43.38	4.697	48.51	5.088
2024-12-29	15.87	45.16	8.985	2.41	25.9	42.72	4.669	47.36	4.904
2024-12-30	15.56	71.93	13.29	2.401	22.79	42.1	4.587	46.02	4.678
2024-12-31	15.36	86.11	14.97	2.432	20.27	47.39	4.457	44.15	4.443
2025-01-01	15.09	95.53	14.74	2.478	18.27	47.51	4.293	42.4	4.223
2025-01-02	14.75	98.21	14.11	2.545	16.77	49	4.122	40.94	4.007
2025-01-03	14.32	92.91	13.15	2.601	16.06	48.35	3.958	39.7	3.79
2025-01-04	13.83	82.04	11.91	2.631	16.4	51.8	3.803	38.52	3.567
2025-01-05	13.38	69.21	10.56	2.625	16.42	53.01	3.678	37.43	3.37
2025-01-06	12.96	57.17	9.283	2.602	19.55	55.37	3.559	36.38	3.314
2025-01-07	12.56	47.13	8.139	2.594	22.71	59.12	3.453	35.37	5.413
2025-01-08	12.2	39.25	7.167	2.574	23.77	60.01	3.362	34.47	6.57
2025-01-09	11.89	33.18	6.387	2.563	24.28	59.71	3.303	33.68	6.881
2025-01-10	11.6	28.58	5.765	2.558	24.78	59.04	3.235	32.96	6.992
2025-01-11	11.32	25.07	5.284	2.548	24.94	57.92	3.171	32.28	17.11
2025-01-12	11.04	22.37	4.914	2.526	24.54	56.4	3.122	31.62	23.67
2025-01-13	10.78	20.23	4.635	2.497	23.69	54.71	3.077	30.97	26.3
2025-01-14	10.53	18.53	4.407	2.44	22.65	52.82	3.038	30.37	28.9
2025-01-15	10.31	17.15	4.22	2.38	21.46	50.91	2.997	29.8	29.43
2025-01-16	10.1	16.01	4.075	2.326	20.38	49.12	2.961	40.03	39.98
2025-01-17	9.891	15.07	3.971	2.288	19.49	47.6	2.944	46.25	43.71
2025-01-18	9.692	14.26	3.849	2.237	18.74	46.27	2.926	49.94	43.28
2025-01-19	9.49	13.57	3.75	2.202	18.12	45.07	2.897	53.54	42.41
2025-01-20	9.301	12.94	3.667	2.189	17.6	44.67	2.858	55.61	40.42
2025-01-21	9.106	12.42	3.623	2.16	17.15	43.76	2.81	57.11	45.77
2025-01-22	8.898	11.91	3.593	2.117	16.75	42.56	2.758	55.37	47.38
2025-01-23	8.706	11.46	3.587	2.088	16.39	41.49	2.708	51.72	45.78
2025-01-24	8.511	11.09	3.583	2.064	16.06	40.56	2.626	47.73	43.2
2025-01-25	8.341	10.75	3.554	2.041	15.74	39.73	2.555	43.99	39.61
2025-01-26	8.177	10.44	3.49	2.005	15.42	38.94	2.508	40.78	39.4
2025-01-27	7.992	10.13	3.417	1.964	23.35	38.15	2.433	38.03	37.77
2025-01-28	7.794	9.806	3.397	1.963	26.93	41.27	2.351	35.76	35.47
2025-01-29	7.584	9.503	3.487	1.985	27.52	42.61	2.473	33.81	35.05
2025-01-30	7.351	9.232	3.766	2.475	27.93	42.51	9.998	35.03	41.95
2025-01-31	7.141	8.976	4.172	2.788	27.83	42.34	18.05	47.62	43.99
2025-02-01	6.864	8.726	4.556	3.071	26.81	42.04	21.93	87.74	49.39
2025-02-02	6.71	8.494	4.737	3.553	25.01	41.36	23.78	112.6	51.62
2025-02-03	6.554	8.291	4.663	4.032	22.89	40.14	23.91	126.9	52.15
2025-02-04	6.442	10.61	4.411	4.246	20.88	38.75	23.79	141.8	53.31
2025-02-05	8.778	14.54	4.091	4.148	19.14	37.29	21.17	155.9	53.35
2025-02-06	10.3	18.06	3.794	3.84	17.63	35.9	17.28	158.5	52.05
2025-02-07	10.78	21.49	3.544	3.468	18.58	34.67	13.78	152.5	49.94
2025-02-08	10.79	23.81	3.342	3.12	18.61	33.57	11.04	142.5	47.36
2025-02-09	10.4	24	3.171	2.8	17.85	32.56	8.921	131.1	44.65
2025-02-10	9.638	22.22	3.036	2.536	17.05	31.69	7.255	119.6	42.15
2025-02-11	8.629	19.39	2.881	2.315	16.24	30.86	5.955	108.8	41.26
2025-02-12	7.645	16.48	2.775	2.132	15.52	30.04	5.06	98.91	39.95
2025-02-13	6.692	14.01	2.691	1.985	14.75	29.28	4.489	90.22	38.51
2025-02-14	8.874	12.03	2.595	2.509	14.02	28.58	4.009	82.79	37.28
2025-02-15	10.66	12.78	2.505	4.423	13.38	27.89	3.655	76.44	38.44
2025-02-16	12.07	11.63	2.429	7.19	12.88	27.19	3.398	70.86	38.51
2025-02-17	15.38	14.58	2.33	9.247	12.44	26.56	3.165	66.48	41.45
2025-02-18	19.9	16.53	2.266	9.637	12.08	25.97	2.909	62.86	42.22
2025-02-19	24.81	18.43	2.217	8.76	11.74	25.35	2.622	59.78	41.7
2025-02-20	28.5	20.95	2.182	7.358	11.72	24.89	2.274	57.06	41.35
2025-02-21	29.34	22.39	2.148	5.975	12.01	24.47	2.084	54.61	41.13
2025-02-22	27.87	23.11	2.034	4.821	13.18	24.01	2.149	52.64	44.38
2025-02-23	35.72	28.31	4.121	7.887	14.43	23.48	2.2	54.16	46.99
2025-02-24	54.89	60.66	5.341	23.06	15.4	22.94	2.269	54.75	49.08
2025-02-25	80.38	99.69	6.705	37.49	15.98	22.4	5.437	54.47	50.49
2025-02-26	95.42	118.7	8.706	53.76	16.47	21.89	17.14	53.94	51.15
2025-02-27	102.8	124.9	9.811	69.14	17.44	21.36	28.36	52.99	50.9
2025-02-28	102.9	128.3	10.18	83.71	18	20.87	38.37	51.43	49.79
2025-03-01	95.11	122.7	10.13	96.65	21.81	20.36	46.63	49.51	48.02
2025-03-02	81.45	108.7	9.67	102.4	23.68	19.82	51.03	47.51	46.08
2025-03-03	66.15	91.49	8.907	101.2	24.3	19.32	51	45.47	44.07
2025-03-04	52.26	74.7	7.844	97.53	25.02	18.85	47.63	43.69	42.1
2025-03-05	41.1	60.12	11.08	90.99	26.35	18.45	42.8	42.63	40.48
2025-03-06	32.75	48.44	15.95	83.55	27.92	18.02	37.6	44.11	40.13
2025-03-07	26.53	39.58	26.21	77.58	28.87	17.66	32.57	42.41	39.96
2025-03-08	21.99	33.18	54.92	73.8	29.57	17.29	30.76	40.4	39.29
2025-03-09	18.54	29.03	88.73	70.72	30.24	17.44	28.11	39.44	41.81
2025-03-10	16.16	28.35	110.6	67.41	30.51	18.89	26.76	38.08	40.99
2025-03-11	15.32	29.29	128.3	63.4	30.31	20.12	25.04	36.92	39.57
2025-03-12	20.39	31.35	139.2	58.75	29.93	21.14	23.22	36.23	46.54
2025-03-13	31.24	34.34	138.4	57.32	29.73	22.2	21.66	36.52	61.24
2025-03-14	59.9	38.43	130.3	64.59	30.56	23.03	20.24	40.44	68.18
2025-03-15	97.97	43.33	119.7	65.55	30.5	23.95	18.87	53.58	69.74
2025-03-16	109.1	48.41	108.2	62.77	30.01	23.96	17.6	75.84	70.45
2025-03-17	103.6	52.22	96.58	61.07	29.81	25.16	16.27	88.53	70.73
2025-03-18	96.74	54.35	85.61	60.2	29.55	25.62	15.47	89.53	69.69
2025-03-19	92.5	55.13	75.5	58.99	29.23	25.18	14.75	86.93	67.29
2025-03-20	90.7	55.9	66.48	56.98	28.68	24.82	13.97	84.71	64.18
2025-03-21	90.95	55.34	58.73	54.17	27.97	24.63	13.24	82.37	60.59
2025-03-22	89.42	54.26	52.16	51.01	27.3	24.77	12.61	79.23	57.48
2025-03-23	85.74	52.32	46.8	47.89	26.71	25.08	12.2	75.13	54.04
2025-03-24	82.1	53.41	42.19	44.93	26.13	25.47	11.8	70.62	51.01
2025-03-25	77.91	52.4	38.11	42.18	25.68	25.42	11.37	66.26	48.41
2025-03-26	73.89	49.99	34.94	40.01	25.28	25.07	10.96	62.24	46.08
2025-03-27	71.99	47.67	32.28	38.16	24.84	25.07	10.59	58.64	43.85
2025-03-28	69.14	48.22	29.75	36.64	24.44	24.73	10.21	55.94	42.28
2025-03-29	65.8	48.11	27.86	35.52	24.26	24.25	9.861	55.61	41.58
2025-03-30	63.34	48.47	26.01	34.13	24.15	23.65	9.552	55.32	41.3
2025-03-31	61.59	47.15	24.36	32.81	23.74	23.02	9.25	53.6	40.38
2025-04-01	60.15	45.07	23.27	31.42	23.63	22.36	8.939	54.14	39.3
2025-04-02	58.47	43.31	22.24	33.76	23.4	21.6	8.834	62.53	38.66
2025-04-03	56.75	41.81	21.35	34.13	22.83	20.9	9.363	63.67	38.24
2025-04-04	54.54	40.33	20.54	33.09	22.19	20.12	29.55	61.07	38.09
2025-04-05	52.37	39.1	19.85	34.93	21.66	19.71	49.25	59.12	37.92
2025-04-06	50.27	37.93	19.08	36.65	21.39	19.37	63.15	57.79	37.71
2025-04-07	47.98	36.39	18.48	37.74	22.51	19.26	72.45	56.86	37.16
2025-04-08	46.38	35.11	17.74	38.9	23.18	19.09	77.83	55.78	36.55
2025-04-09	44.27	39.11	17.26	40.55	25.08	18.82	78.85	54.43	35.34
2025-04-10	44.8	40.72	16.81	41.03	25.41	18.64	76.51	52.7	34.36
2025-04-11	44.85	39.64	16.39	40.64	25.12	18.52	70.39	50.73	33.18
2025-04-12	43.58	38.22	15.96	39.55	24.66	18.31	62.97	49.13	32.27
2025-04-13	42.27	36.75	15.29	38.01	24.12	17.93	55.73	47.75	31.53
2025-04-14	41.17	35.27	14.99	36.23	23.5	17.42	49.1	46.41	30.79
2025-04-15	39.99	34.03	14.84	34.65	22.63	16.92	43.15	44.8	30.26
2025-04-16	38.64	32.71	14.32	32.77	22.07	16.62	38.16	43.17	29.31
2025-04-17	37.16	31.4	14.33	31.27	21.39	16.38	34.18	42.48	28.38
2025-04-18	35.72	30.16	14.35	29.82	20.56	15.77	30.79	45.69	27.99
2025-04-19	34.22	29.13	14.41	28.54	19.74	15.09	27.64	47.28	27.85
2025-04-20	32.75	28.07	14.48	28.36	18.97	15.01	25.45	45.45	27.33
2025-04-21	31.28	27.01	16.06	28.17	18.49	14.88	23.9	43.51	26.33
2025-04-22	30.37	26.19	16.95	28.11	17.97	14.58	22.58	42.71	27.16
2025-04-23	29.59	25.6	16.81	27.91	17.7	14.28	21.2	41.71	27.59
2025-04-24	28.69	24.94	16.58	27.87	17.81	13.97	20.09	40.85	27.38
2025-04-25	27.92	24.84	16.37	27.4	19.11	13.82	18.89	39.69	26.9
2025-04-26	26.97	24.65	15.89	26.58	20.08	14.2	18.31	42.51	26.87
2025-04-27	26.16	24.33	15.13	25.55	20.02	13.94	17.56	42.15	28.04
2025-04-28	25.38	23.74	14.21	24.23	19.44	13.8	16.83	41.22	28.74
2025-04-29	24.52	22.75	13.2	23.06	18.77	13.84	16.02	40.69	29.22
2025-04-30	23.03	21.38	12.35	22.36	18.9	13.98	15.12	40.21	31.1
2025-05-01	21.59	20.17	11.8	21.63	18.41	14.46	14.34	39.5	33.3
2025-05-02	20.41	19.23	11.54	21.16	18.01	14.96	13.46	38.16	34.55
2025-05-03	19.31	18.46	11.43	20.8	17.31	15.28	12.76	37.67	34.84
2025-05-04	18.27	17.73	11.41	20.36	16.78	15.31	11.91	36.11	34.09
2025-05-05	17.71	17.12	11.32	19.69	16.26	15.25	11.28	34.34	32.85
2025-05-06	17.71	16.75	11.08	18.98	15.96	14.75	11.18	33.13	31.77
2025-05-07	17.38	16.5	10.94	18.22	15.52	14.12	10.95	31.73	30.32
2025-05-08	16.41	16	10.69	17.31	14.9	13.48	10.44	30.37	28.35
2025-05-09	16.22	15.47	10.48	16.9	14.27	12.74	10.11	29.33	26.72
2025-05-10	15.96	14.92	10.3	17.02	13.79	12.01	9.867	30.18	26.51
2025-05-11	16.48	14.49	10.04	16.59	13.89	11.44	9.696	30.28	25.87
2025-05-12	16.44	14.36	9.7	16.24	13.73	11.28	9.552	29.46	24.75
2025-05-13	16.12	14.19	9.383	16.03	13.21	11.15	9.448	28.35	23.48
2025-05-14	15.66	14.03	9.038	15.94	13.45	10.91	9.264	27.22	22.26
2025-05-15	15.69	13.73	8.858	15.64	13.6	10.73	8.908	26.34	21.94
2025-05-16	15.57	13.49	9.015	15.39	13.45	10.6	9.583	25.61	22.69
2025-05-17	15.14	13.44	9.069	15	13.31	10.34	9.346	27.34	22.97
2025-05-18	14.52	13.26	8.976	14.42	12.78	9.988	8.909	27.5	22.31
2025-05-19	13.52	12.45	8.68	13.81	12.14	9.522	8.481	26.79	21.71
2025-05-20	12.71	11.51	8.304	13.06	11.53	8.993	8.201	25.92	21.23
2025-05-21	11.87	11.17	7.796	12.13	12.23	8.513	7.943	24.87	20.65
2025-05-22	11.18	11.06	7.038	11.42	12.85	8.436	7.714	23.89	19.62
2025-05-23	11.18	10.72	6.201	11	12.79	8.18	7.402	22.84	19.45
2025-05-24	10.85	10.66	5.627	10.91	15.26	7.904	7.039	21.96	19
2025-05-25	10.35	10.37	5.2	10.48	19.48	7.795	6.685	20.88	18.42
2025-05-26	10.44	10.69	4.813	9.802	19.82	7.466	6.046	20.69	17.88
2025-05-27	14.59	10.8	4.974	9.444	18.29	7.067	5.625	20.39	17.22
2025-05-28	14.76	10.66	5.186	9.101	16.7	6.88	5.13	19.69	16.65
2025-05-29	13.47	10.34	5.353	8.847	15.54	6.855	4.857	19.72	16.42
2025-05-30	12.23	9.947	5.478	8.786	14.24	6.883	4.83	19.05	15.92
2025-05-31	11.68	9.476	5.558	8.693	13.16	6.956	4.798	18.89	15.17
2025-06-01	11.42	9.506	5.519	8.844	12.36	6.923	4.698	18.47	15.05
2025-06-02	10.81	9.337	5.533	8.922	12.02	6.746	4.529	17.43	14.7
2025-06-03	9.718	9.197	5.304	8.922	11.95	6.166	4.449	16.7	14.05
2025-06-04	8.977	8.976	5.317	8.762	11.88	5.905	4.36	17.86	13.76
2025-06-05	9.157	8.616	5.083	8.498	11.71	6.096	4.256	17.98	14.22
2025-06-06	9.234	8.19	4.763	8.048	11.49	6.246	4.284	17.62	14.46
2025-06-07	9.23	7.938	4.48	7.513	11.6	6.347	4.04	17.16	14.45
2025-06-08	9.168	7.673	4.308	7.262	11.66	6.31	3.594	16.41	13.76
2025-06-09	9.09	7.564	4.268	7.104	11.39	6.149	3.468	15.5	12.97
2025-06-10	8.822	7.577	3.802	7.23	11.77	5.761	3.524	14.88	12.12
2025-06-11	8.491	7.64	4.604	7.138	11.79	5.3	3.667	14.5	11.67
2025-06-12	8.058	7.72	5.344	6.997	11.5	4.832	3.714	15.04	11.3
2025-06-13	7.358	10.99	5.403	6.486	11.62	4.179	3.719	16.56	11.26
2025-06-14	6.802	11.61	5.292	6.241	11.72	5.943	3.692	16.86	11.07
2025-06-15	7.067	10.67	5.014	5.973	12.07	6.641	3.538	16.17	10.6
2025-06-16	7.231	9.576	7.738	5.691	11.96	6.499	3.326	15.02	10.15
2025-06-17	7.299	8.691	10.83	5.579	12.06	6.522	4.502	12.78	11.08
2025-06-18	7.258	8.004	13.59	5.552	13.63	6.569	4.963	11.59	11.74
2025-06-19	7.079	8.68	14.81	5.399	14.06	6.29	4.947	11.85	12.16
2025-06-20	6.479	8.241	14.47	5.228	13.62	5.808	4.767	12.25	12.19
2025-06-21	5.486	7.945	13.32	4.915	12.7	5.379	4.696	15.85	11.63
2025-06-22	5.303	7.764	11.65	4.747	12.01	5.343	4.569	18.5	11.12
2025-06-23	6.295	7.476	10.59	4.637	11.65	5.361	4.375	19.04	10.89
2025-06-24	8.651	6.873	9.336	4.573	11.57	5.186	18.31	19.04	10.13
2025-06-25	11.39	6.124	7.924	4.27	11.35	5.127	20.41	18.43	8.69
2025-06-26	12.9	5.355	6.711	3.931	11.21	4.94	15.13	18.6	7.642
2025-06-27	12.94	5.04	5.73	3.775	11.26	4.764	11.39	17.61	7.229
2025-06-28	11.55	4.882	4.994	3.811	11.43	4.555	8.715	16.17	7.33
2025-06-29	10.27	5.04	4.68	4.078	11.24	4.21	7.029	14.93	7.33
2025-06-30	8.743	5.128	4.302	4.215	11.15	3.631	5.678	14	8.161
2025-07-01	7.306	5.118	3.806	4.185	11.15	3.274	4.489	17.13	8.718
2025-07-02	6.138	5.057	3.829	4.182	11.2	3.062	3.021	20.92	10.89
2025-07-03	4.817	4.845	3.725	4.086	11.16	3.11	2.272	22.59	13.42
2025-07-04	4.222	4.407	3.418	3.691	11.05	3.124	2.433	22.92	15.29
2025-07-05	4.436	4.11	2.972	3.152	11.32	2.896	2.529	21.22	16.1
2025-07-06	4.643	4.188	2.737	3.103	12.16	2.867	2.63	18.52	16.32
2025-07-07	4.868	4.239	2.719	3.112	13.13	2.793	2.733	16.41	15.67
2025-07-08	4.986	4.383	2.8	3.094	13.96	2.488	2.792	14.45	19.02
2025-07-09	5.029	4.428	3.02	3.036	14.29	2.328	2.827	12.32	19.85
2025-07-10	4.826	4.362	3.144	2.892	14.34	2.27	2.83	10.63	18.33
2025-07-11	4.501	9.424	3.271	2.678	14.97	2.385	2.844	11.57	16.38
2025-07-12	3.908	11.16	3.304	2.531	14.56	2.568	2.795	11.91	14.54
2025-07-13	3.842	10.01	3.208	2.404	13.58	2.687	2.694	11.69	12.78
2025-07-14	3.936	8.592	3.032	2.187	12.68	2.86	2.566	11.39	11.55
2025-07-15	3.973	7.507	2.583	1.993	11.95	3.053	2.481	10.97	10.81
2025-07-16	3.864	6.623	1.966	1.725	11.46	3.286	2.439	10.9	9.681
2025-07-17	3.676	5.766	1.732	1.7	11.43	3.601	2.413	11.2	8.749
2025-07-18	3.35	4.966	1.54	1.514	11.62	3.96	2.464	11.21	8.462
2025-07-19	3.357	4.46	1.466	1.431	11.63	4.185	2.536	10.8	8.131
2025-07-20	3.471	4.154	1.417	1.51	15.43	4.267	2.641	10.98	8.027
2025-07-21	3.52	3.852	1.394	1.544	16.59	4.154	2.668	10.7	7.646
2025-07-22	3.517	3.371	1.352	1.578	16.22	3.904	2.64	9.424	7.295
2025-07-23	3.559	2.873	1.23	1.514	16.18	3.604	2.697	9.397	7.11
2025-07-24	3.535	2.629	1.307	1.4	16.38	3.301	3.314	9.465	6.876
2025-07-25	3.514	2.403	1.462	1.436	16.46	3.137	3.568	9.509	6.785
2025-07-26	3.515	2.422	1.631	1.413	35.84	3.11	3.493	9.461	6.472
2025-07-27	3.433	2.552	1.769	1.364	51.76	3.096	3.192	9.588	27.01
2025-07-28	3.374	2.632	1.974	1.51	62.58	3.049	4.217	61.17	34.82
2025-07-29	3.367	2.713	2.082	1.68	69.85	2.977	4.617	66.86	33.89
2025-07-30	3.404	2.759	2.05	1.787	72.43	2.824	4.448	48.82	33.44
2025-07-31	3.35	2.743	1.95	1.847	69.88	2.582	4.183	31.92	33.42
2025-08-01	3.332	2.655	1.86	1.81	64.14	2.482	14.1	21.34	33.24
2025-08-02	3.243	2.464	2.182	1.692	58.89	2.815	17.96	16.58	32.6
2025-08-03	3.244	2.248	2.51	1.556	52.41	2.897	17.53	14.31	30.92
2025-08-04	3.164	2.028	2.699	1.442	45.39	2.897	15.81	12.88	28.57
2025-08-05	3.025	2.021	2.716	1.28	39.97	2.96	13.46	12.19	25.91
2025-08-06	2.984	2.248	2.488	1.098	36.13	2.938	11.47	12.3	22.67
2025-08-07	2.96	2.381	2.21	1.112	33.3	2.788	9.445	12.02	19.69
2025-08-08	2.768	2.376	1.979	1.089	30.71	2.651	7.577	12.07	17.44
2025-08-09	2.792	2.392	2.086	1.095	27.85	2.48	5.976	12.25	16.08
2025-08-10	2.857	2.382	2.177	1.151	25.95	2.062	4.783	12.06	16.28
2025-08-11	3.243	2.423	2.186	1.243	23.77	1.674	3.958	11.68	16.85
2025-08-12	3.348	2.473	2.307	1.272	26.25	1.617	3.364	11.84	16.74
2025-08-13	3.325	2.481	2.339	1.284	28.84	1.487	3.035	11.28	16.03
2025-08-14	3.333	2.463	2.287	1.239	33.34	1.493	2.761	10.52	15.15
2025-08-15	3.262	2.324	2.165	1.164	30.83	1.465	2.586	9.761	14.08
2025-08-16	3.846	2.153	2.09	1.064	26.73	1.333	2.485	9.38	19.25
2025-08-17	6.007	2.055	1.984	0.9371	25.46	1.419	2.402	8.812	22.87
2025-08-18	7.782	2.241	1.772	0.789	24.41	1.674	2.394	8.282	23.21
2025-08-19	10.54	2.209	1.613	0.7575	25.79	1.845	2.384	8.061	22.3
2025-08-20	22.99	2.151	1.512	0.7414	28.42	1.952	2.283	8.281	23.04
2025-08-21	30.9	2.016	1.649	0.8225	30.17	2	2.109	22.4	27.35
2025-08-22	34.38	1.842	1.968	0.9457	31.62	2.077	2.322	53.03	30.44
2025-08-23	37.31	1.776	2.223	2.082	32.64	2.077	2.379	65.51	30.84
2025-08-24	37.34	1.802	2.471	2.483	32.53	3.511	2.355	66.01	30.19
2025-08-25	33.64	1.832	2.524	2.481	31.24	3.628	2.3	63.59	29.24
2025-08-26	30.64	1.828	2.434	3.248	34.45	2.805	2.253	59.61	29.33
2025-08-27	26.75	1.885	2.326	3.571	47.62	2.446	2.208	59.7	29.39
2025-08-28	28.09	1.935	2.185	3.424	48.46	2.293	2.315	55.45	28.53
2025-08-29	58.8	1.96	2.474	3.075	43.22	2.312	2.386	48.86	26.74
2025-08-30	74.71	1.994	3.587	2.694	38.22	3.976	2.325	42.59	24.67
2025-08-31	78.96	3.478	4.255	2.303	34.37	4.114	2.307	37.91	22.33
2025-09-01	80.48	3.544	10.55	2.043	40.66	3.347	2.26	33.8	20.39
2025-09-02	78.8	2.937	15.87	1.879	39.7	2.683	2.196	30.24	18.63
2025-09-03	75.18	2.577	17.16	1.783	35.24	2.235	2.144	33.8	17.37
2025-09-04	67.4	2.445	16.54	1.705	34.23	1.914	2.156	38.61	16.53
2025-09-05	57.7	2.375	15.04	1.635	33.39	1.326	2.279	43.94	15.8
2025-09-06	49.1	2.255	13.34	1.635	31.74	1.059	2.289	49.18	15.2
2025-09-07	42.27	2.145	11.35	1.598	29.75	0.9405	2.25	51.76	14.85
2025-09-08	37.23	2.084	9.454	1.575	28.05	0.9252	2.221	50.85	14.45
2025-09-09	33.26	2.053	8.226	1.597	26.45	0.9402	2.142	47.22	13.96
2025-09-10	30.04	2.153	7.196	1.613	27.26	0.9447	1.912	42.46	13.54
2025-09-11	27.56	2.421	6.36	1.586	26.51	0.9489	2.419	38.69	13.11
2025-09-12	25.68	3.167	5.616	1.518	29.39	0.9668	2.439	36.38	12.72
2025-09-13	24.38	4.367	4.909	1.426	34.38	1.005	3.911	34.85	12.29
2025-09-14	23.19	5.666	4.241	2	35.88	1.071	4.911	34	11.93
2025-09-15	22	6.65	3.68	2.558	35.86	1.154	5.272	33.95	28.91
2025-09-16	20.87	7.016	3.523	2.792	35.76	1.396	6.254	33.37	35.66
2025-09-17	20.07	6.81	3.267	2.806	35.59	1.545	8.091	31.95	32.29
2025-09-18	18.92	6.368	3.048	2.61	36.92	1.661	9.889	31.01	28.89
2025-09-19	18.21	5.817	2.815	2.276	36.84	1.752	11.12	30.26	26.17
2025-09-20	17.57	5.281	2.576	1.918	43.6	1.861	11.28	29.34	23.72
2025-09-21	16.82	4.849	2.331	1.619	48.07	1.883	10.58	28.56	21.36
2025-09-22	16.22	4.459	3.877	1.661	49.41	2.743	9.506	27.67	19.25
2025-09-23	15.55	4.103	5.193	1.616	50.54	3.132	8.224	27.05	18.1
2025-09-24	14.91	3.8	5.921	1.5	51.07	3.096	6.973	27.84	17.13
2025-09-25	14.39	3.522	6.152	1.384	50.51	2.987	5.875	32	16.91
2025-09-26	14.08	3.28	5.846	1.252	48.51	2.835	4.971	35.41	19.24
2025-09-27	13.76	3.08	5.106	1.188	47.19	2.6	4.138	37.68	18.79
2025-09-28	13.31	2.96	4.223	1.208	45.59	2.326	3.452	39.17	17.05
2025-09-29	12.94	3.641	3.547	1.231	52.22	2.103	2.942	39.79	15.62
2025-09-30	13.44	3.81	2.965	1.297	56.03	1.914	2.7	39.2	14.55
2025-10-01	13.26	3.636	2.472	1.263	57.58	1.748	2.6	37.69	13.62
2025-10-02	12.68	3.517	1.86	1.188	59.17	1.685	2.483	35.76	12.91
2025-10-03	12.19	3.397	1.54	1.053	59.98	1.66	2.362	33.87	12.31
2025-10-04	11.86	3.208	2.777	0.9792	59.37	1.613	2.233	32.15	11.67
2025-10-05	11.57	2.94	2.917	0.9295	57.93	1.586	2.21	30.71	11.28
2025-10-06	11.4	2.638	2.342	0.9252	55.72	1.6	2.235	29.41	10.89
2025-10-07	11.21	2.372	1.853	0.9853	54.11	1.597	2.241	28.2	10.45
2025-10-08	10.98	2.187	1.672	1.138	52.06	2.296	2.675	27.45	10.23
2025-10-09	10.66	2.036	1.657	1.301	50.1	2.559	3.571	26.72	10.05
2025-10-10	10.3	1.947	2.898	1.51	48.45	3.256	4.1	26.05	10.02
2025-10-11	9.988	1.958	3.976	1.666	46.84	3.325	4.352	25.49	9.82
2025-10-12	9.635	1.974	3.887	1.747	45.16	3.075	4.405	24.97	9.646
2025-10-13	9.365	1.956	3.416	1.779	43.56	2.852	4.197	24.36	9.351
2025-10-14	9.101	1.976	2.942	1.718	41.98	2.669	3.84	23.77	9.215
2025-10-15	8.846	1.973	2.615	1.626	40.86	2.481	3.45	23.42	9.092
2025-10-16	8.639	1.945	2.35	1.511	39.76	2.274	3.146	23.07	8.907
2025-10-17	8.434	1.886	2.113	1.387	38.7	2.101	2.869	23.68	8.799
2025-10-18	8.258	1.861	2.114	1.322	37.69	1.94	2.832	23.64	8.824
2025-10-19	8.082	1.815	2.168	1.318	36.89	1.797	2.796	23.33	8.909
2025-10-20	9.095	1.788	2.109	1.288	36.5	1.71	2.766	22.98	8.956
2025-10-21	9.649	1.816	2.004	1.266	36.05	1.651	6.25	22.84	8.862
2025-10-22	9.915	1.9	1.888	1.215	35.45	1.586	8.63	22.54	8.654
2025-10-23	10.16	1.961	1.689	1.272	34.83	1.947	9.69	22.09	8.495
2025-10-24	10.29	1.993	1.5	1.434	34.16	2.075	9.962	21.63	8.506
2025-10-25	10.19	2.105	1.437	1.603	33.47	2.124	10.18	21.18	8.447
2025-10-26	9.915	2.199	1.491	1.709	32.76	2.503	9.817	20.65	8.245
2025-10-27	9.543	2.271	1.49	2.395	32.12	2.675	9.284	20.14	8.148
2025-10-28	10.06	2.923	1.476	2.806	31.51	3.035	14.93	19.65	15
2025-10-29	12.32	3.94	1.466	2.99	30.9	4.316	17.72	22.61	19.77
2025-10-30	13.63	4.423	1.486	3.079	30.37	5.112	18.16	30.27	21.58
2025-10-31	15.92	4.48	1.498	3.026	30.49	5.492	18.2	32.36	22.41
2025-11-01	17.26	4.238	1.49	2.836	30.93	5.66	17.78	31.78	22.63
2025-11-02	17.58	3.842	1.454	2.6	31.37	5.54	16.74	32.8	22.32
2025-11-03	18.7	7.196	1.403	2.364	31.52	5.158	15.22	33.27	21.94
2025-11-04	26.73	8.606	1.944	2.507	32.44	4.644	13.63	32.72	20.69
2025-11-05	29.53	8.281	4.856	3.691	32.86	4.118	12.18	33.96	19.05
2025-11-06	29.35	7.988	6.992	4.377	32.77	3.659	10.91	34.24	20.61
2025-11-07	28.2	7.585	10.13	4.974	32.4	3.273	10.08	33.45	20.72
2025-11-08	27.12	7.006	12.59	6.056	31.81	2.95	9.383	34.37	21.65
2025-11-09	25.94	9.172	12.92	6.435	31.1	2.75	8.792	34.36	21.78
2025-11-10	24.58	10.14	12.45	6.226	30.34	3.275	8.33	33.77	21.4
2025-11-11	23.29	11.53	11.64	5.781	29.47	3.605	10.46	33.17	21.28
2025-11-12	22.1	12.11	10.76	5.328	28.56	3.722	11.52	33.22	22
2025-11-13	21.02	12.02	9.87	4.679	27.83	3.907	13.09	32.81	21.79
2025-11-14	20.08	11.61	9.163	3.953	27.14	6.073	13.96	32.07	21.69
2025-11-15	20.12	10.94	8.552	3.332	26.52	8.502	14.43	31.36	22.22
2025-11-16	20.11	10.03	7.901	9.908	25.93	11.15	15.17	30.85	22.2
2025-11-17	19.54	8.997	7.188	13.11	25.41	12.5	16.12	30.39	21.89
2025-11-18	18.74	7.963	6.459	13.64	24.88	13.02	16.47	29.91	21.58
2025-11-19	18.2	7.024	5.863	13.47	24.4	13.09	16.35	30.39	21.26
2025-11-20	18.4	6.222	5.326	12.52	23.94	12.62	16.1	32.72	25.05
2025-11-21	20.65	5.567	4.857	11	23.48	11.68	15.71	49.24	30.46
2025-11-22	23.08	5.033	4.488	9.382	23.03	11.09	15.14	60.38	30.9
2025-11-23	24.75	4.611	4.432	7.883	22.55	10.49	14.44	68.36	29.81
2025-11-24	25.62	4.35	4.778	6.596	22.1	9.747	13.74	77.62	29.28
2025-11-25	25.77	4.244	4.91	5.544	21.7	10.9	13.08	86.08	29
2025-11-26	25.18	4.103	4.936	4.719	21.27	11.33	12.51	89.74	30.68
2025-11-27	24.24	3.965	4.969	4.087	20.88	11.98	12.01	88.36	31.44
2025-11-28	23.27	3.86	4.937	3.596	20.47	12	11.69	83.91	31.57
2025-11-29	26.37	3.753	4.825	3.225	20.04	11.53	13.39	78.22	31.56
2025-11-30	24.12	5.002	4.627	2.914	20.34	10.79	13.99	72.53	31.33
2025-12-01	23.02	6.549	4.395	2.657	21.58	9.892	14.05	67.41	30.84
2025-12-02	27.3	10.72	4.157	2.433	22.54	16.52	14.3	62.98	30.14
2025-12-03	32.94	14.53	4.688	9.605	23.59	21.35	14.88	59.35	29.33
2025-12-04	36.5	16.25	8.49	16.65	24.34	21.4	18.22	56.32	28.66
2025-12-05	38.76	16.77	10.59	19.79	24.33	19.92	19.45	53.83	27.98
2025-12-06	40.05	16.48	11.45	20.43	23.65	18.31	19.51	51.76	27.28
2025-12-07	39.84	15.52	11.96	21.24	22.62	16.54	19.7	51.03	26.65
2025-12-08	38.01	14.02	11.89	21.58	21.47	14.63	19.82	49.93	26.13
2025-12-09	40.32	12.47	11.16	20.23	20.47	12.73	20.27	48.75	25.71
2025-12-10	40.61	15.6	10.02	18.06	19.3	11.04	21.37	50.58	32.54
2025-12-11	39.64	16.14	8.787	15.88	18.42	12.58	22.47	52.84	37.24
2025-12-12	38.85	15.42	7.659	13.86	17.76	12.85	24.42	53.71	38.51
2025-12-13	37.75	15.54	6.727	12	17.24	12.05	26.31	58.11	45.86
2025-12-14	35.91	16	5.994	10.36	16.84	11.34	27.64	60.29	49.19
2025-12-15	33.48	15.93	5.429	9.012	16.46	10.82	28.39	60.73	49.3
2025-12-16	30.88	15.1	4.995	7.911	16.13	10.55	28.43	60.78	48.72
2025-12-17	28.38	13.71	4.66	7.019	15.76	10.12	29.23	60.42	47.71
2025-12-18	26.32	12.14	4.397	6.308	15.41	9.652	28.96	59.39	46.18
2025-12-19	24.79	10.67	4.182	10.58	15.12	9.239	28.17	57.84	44.26
2025-12-20	23.79	9.419	4.001	13.57	16.22	8.839	27.5	56.03	42.17
2025-12-21	23.16	8.38	3.853	13.71	24.78	12.92	27.74	54.24	40.22
2025-12-22	25.35	8.483	3.719	13.51	35.69	22.84	27.44	52.58	38.54
2025-12-23	28.97	9.054	3.612	13.26	42.2	27.28	26.83	51.09	37.11
2025-12-24	30.68	10.21	3.51	12.7	48.53	27.67	26.3	49.8	35.89
2025-12-25	31.32	11.68	3.424	11.91	50.79	27.22	25.89	48.65	34.88
2025-12-26	40.34	15.54	3.351	10.98	49.81	26.24	25.95	47.63	34
2025-12-27	48.92	19.64	3.28	10.37	47.71	24.52	25.69	46.65	33.23
2025-12-28	52.92	24.27	3.359	9.801	46.86	22.27	25.19	45.77	32.52
2025-12-29	54.22	27.14	7.6	10.07	45.33	19.92	24.67	44.94	31.88
2025-12-30	53.44	28.14	9.667	9.52	43.62	17.75	24.17	44.13	31.28
2025-12-31	51.06	27.49	10.52	8.394	44.64	15.93	23.71	43.34	30.67
2026-01-01	47.66	28.77	10.79	7.391	45.03	14.43	23.21	42.57	30.18
2026-01-02	44.23	37.19	10.07	6.627	44.47	28.55	22.73	41.8	29.61
2026-01-03	41.22	40.45	8.658	6.047	43.84	38.5	22.23	41.06	29.06
2026-01-04	40.83	40.01	7.124	5.582	43.35	43.32	21.78	40.35	28.55
2026-01-05	40.7	38.38	5.843	5.208	43.23	46.55	21.33	39.63	28.05
2026-01-06	40.02	36.5	4.895	4.906	42.84	48.51	20.91	38.94	27.54
2026-01-07	40	34.92	4.221	4.652	42.5	47.55	20.52	38.16	27.01
2026-01-08	40.75	33.89	3.748	4.441	44.49	44.45	20.14	37.5	26.52
2026-01-09	41.71	33.07	3.407	4.264	45.12	40.48	19.76	36.83	26
2026-01-10	42.33	31.99	3.119	4.073	44.73	36.58	19.39	36.17	25.53
2026-01-11	42.35	30.46	2.905	3.917	44.51	33.03	19	35.49	25.04
2026-01-12	41.69	28.49	2.754	3.783	45.06	29.86	18.63	34.8	24.56
2026-01-13	40.54	26.34	2.624	3.648	45.1	27.09	18.29	34.12	24.11
2026-01-14	39.21	24.21	2.537	3.54	44.74	24.67	17.95	33.45	23.69
2026-01-15	37.91	22.29	2.459	3.435	44.14	22.59	17.62	32.77	23.23
2026-01-16	36.71	20.59	2.405	3.341	43.31	20.81	17.29	32.13	22.76
2026-01-17	35.64	19.14	2.642	7.286	42.39	19.31	16.96	31.49	22.3
2026-01-18	34.75	17.88	8.243	13.23	41.53	23.61	16.62	30.87	21.87
2026-01-19	33.98	16.8	12.42	16.96	40.7	32.08	16.38	30.26	21.43
2026-01-20	33.33	15.92	15.34	19.44	39.96	38.36	16.05	29.69	21.03
2026-01-21	32.73	15.15	17.65	21.81	39.52	42.25	15.78	29.14	20.66
2026-01-22	32.2	14.88	20.95	23.36	39.11	45.01	15.46	28.56	20.24
2026-01-23	31.69	15.02	24.73	26.77	38.75	46.8	15.16	27.98	19.85
2026-01-24	31.18	15.6	27.62	28.43	38.38	49.95	14.85	27.46	19.46
2026-01-25	30.65	16.32	30.43	29.04	37.97	49.86	14.55	26.9	19.07
2026-01-26	30.15	16.85	32.68	31.4	37.44	47.53	14.26	26.34	18.75
2026-01-27	29.65	16.99	33.12	33.43	36.82	44.73	14	25.89	18.46
2026-01-28	29.12	16.66	31.32	33.99	36.54	41.85	13.7	25.4	18.12
2026-01-29	28.61	15.91	28.01	34.62	37.37	42.98	13.47	24.85	17.81
2026-01-30	28.12	15.03	24.24	34.1	39.84	42.09	13.18	24.31	17.48
2026-01-31	27.61	14.15	20.82	32.53	44.92	40.24	12.9	23.84	17.09
2026-02-01	27.16	13.31	18.05	30.68	49.87	38.85	12.69	23.37	16.73
2026-02-02	26.69	12.52	15.83	28.72	51.9	40.45	12.44	22.94	16.41
2026-02-03	26.2	12.05	13.98	26.6	52.49	40.93	12.18	22.53	16.15
2026-02-04	25.74	11.81	12.4	24.36	52.8	40.22	11.94	22.12	15.88
2026-02-05	25.36	11.69	11.04	22.12	55.72	48.56	11.7	21.7	15.57
2026-02-06	24.95	11.55	9.917	20	56.76	52.36	11.47	21.29	15.24
2026-02-07	24.51	11.33	8.96	18.07	55.29	51.88	11.26	20.89	14.89
2026-02-08	24.08	10.93	9.035	16.43	52.89	50.86	11.03	20.43	14.61
2026-02-09	23.58	10.46	11.9	15.06	50.82	49.86	10.8	20.03	14.35
2026-02-10	22.97	9.942	12.68	13.96	49.04	48.43	10.57	19.63	14.09
2026-02-11	22.51	9.544	14.47	13.03	51.06	46.54	10.37	19.21	13.79
2026-02-12	21.97	9.168	16.09	12.27	53.78	44.35	10.16	18.81	13.52
2026-02-13	21.52	8.821	16.98	11.65	56.42	42.1	9.938	18.43	13.26
2026-02-14	21.17	8.53	17.27	11.09	59.89	39.94	9.775	18.05	13
2026-02-15	20.78	8.261	18.66	10.75	62.16	37.95	13.35	17.63	12.76
2026-02-16	20.36	7.995	19.65	11.98	63.13	36.23	24.94	17.41	12.55
2026-02-17	19.98	7.737	20.13	12.89	63.1	34.76	40.64	17.09	12.34
2026-02-18	19.6	7.495	20.56	13.6	62.49	33.52	59.2	16.74	12.1
2026-02-19	19.22	7.264	21.99	14.07	62.75	32.51	71.85	16.42	11.85
2026-02-20	18.76	7.042	22.01	13.98	61.99	31.6	83.36	16.12	11.61
2026-02-21	18.39	6.824	22.1	16.19	61.13	31.06	93.6	15.71	11.39
2026-02-22	18	6.622	21.66	17.22	59.96	30.79	101.3	15.38	11.17
2026-02-23	17.63	6.446	21.18	17.24	58.69	30.49	105.4	15.09	10.96
2026-02-24	17.3	6.285	20.7	17.1	57.59	30.57	109.2	14.84	10.72
2026-02-25	16.92	6.137	21.75	17.32	56.53	30.67	130.3	14.58	10.51
2026-02-26	16.52	5.99	25.59	26.55	55.38	30.89	137.3	14.35	10.34
2026-02-27	16.15	5.82	28.94	38.44	54.34	31.37	133.1	14.11	10.16
2026-02-28	15.84	5.695	32.02	42.3	53.96	31.78	126.9	13.83	9.969
2026-03-01	15.46	5.566	35.49	41.93	53.42	32.33	119.8	13.61	9.79
2026-03-02	15.08	5.433	39.22	40.71	53.12	32.36	111.3	13.36	9.598
2026-03-03	14.94	5.277	41.97	39.25	52.87	35.14	101.7	13.09	9.401
2026-03-04	15.11	5.09	42.9	37.23	52.47	36.11	91.91	12.82	9.163
2026-03-05	15.72	5.007	42.58	34.93	51.85	36.19	82.79	12.51	9.024
2026-03-06	16.48	5.131	41.64	32.55	51.16	35.72	74.85	12.36	8.994
2026-03-07	21.92	12.63	40.33	30.49	50.51	34.94	71.13	12.19	9.187
2026-03-08	31.69	33.89	38.77	28.47	49.86	34.17	68.29	11.92	9.503
2026-03-09	44.77	53.3	37.05	26.48	49.15	33.45	68.18	11.61	9.784
2026-03-10	58.55	67.56	35.29	24.7	48.2	32.7	64.93	11.36	9.827
2026-03-11	77.14	73.2	33.64	23.07	47.25	31.87	60.5	11.17	9.59
2026-03-12	81.88	72.1	32.13	21.62	46.34	31.07	57.19	11	9.192
2026-03-13	75.88	67.23	30.81	20.49	45.41	30.3	55.01	10.82	8.607
2026-03-14	67.29	61.68	29.64	19.51	44.82	29.61	53.85	10.64	8.03
2026-03-15	60.35	57.37	28.62	18.64	44.5	28.92	53.19	10.45	7.617
2026-03-16	54.81	54.61	27.81	18.1	43.88	28.77	52.54	10.55	7.379
2026-03-17	51.23	52.57	26.99	28.26	43.08	28.58	51.77	12.09	10.11
2026-03-18	49.67	50.23	27.46	32.49	42.46	28.42	50.82	13.07	18.75
2026-03-19	49.45	47.07	27.11	30.75	41.61	28.48	49.93	14.5	31.58
2026-03-20	49.31	43.35	26.02	28.55	40.6	28.77	48.99	23.99	70.14
2026-03-21	48.78	39.44	24.99	26.85	39.74	37.1	47.75	44.19	112.8
2026-03-22	47.86	35.66	24.28	25.15	38.79	40.15	47.2	72.67	162.8
2026-03-23	46.26	33.36	23.43	23.34	38.01	40.08	45.97	117.2	192.6
2026-03-24	44.43	31.65	24.16	21.46	37.27	42.25	44.61	173.7	201.1
2026-03-25	43.07	30.29	23.81	19.87	36.43	43.26	43.31	211.4	194
2026-03-26	42.92	29.56	22.79	18.68	35.55	43.73	42.14	227.3	177.1
2026-03-27	42.84	28.93	22.24	17.54	35	43.91	41.58	225.5	156.6
2026-03-28	41.72	28.37	21.35	16.52	34.36	44.03	40.68	211	137.9
2026-03-29	40.59	27.51	20.85	16.1	33.33	42.87	40.79	190	124.3
2026-03-30	40.04	26.63	26.78	15.82	32.46	41.15	40.27	167.7	113
2026-03-31	39.71	25.81	29.2	15.31	31.57	39.78	39.42	147	102.8
2026-04-01	39.21	24.84	29.07	14.5	30.72	38.53	38.57	128.9	93.1
2026-04-02	38.36	23.78	28.03	16.45	30.7	37.26	37.79	113.4	83.48
2026-04-03	37.31	22.67	28.39	17.07	31.33	36.06	36.67	104.4	74.92
2026-04-04	35.98	21.46	28.93	16.61	31.47	34.78	35.74	95.78	67.82
2026-04-05	34.26	20.44	28.17	15.95	31.57	33.44	34.94	86.17	61.11
2026-04-06	32.89	19.38	26.96	15.32	31.46	32.2	34.05	78.56	55.84
2026-04-07	31.87	18.5	25.83	14.76	31.26	31.26	33.07	72.48	64.4
2026-04-08	30.77	17.55	24.65	14.11	30.95	30.29	32.45	67.88	63.56
2026-04-09	30.1	16.76	23.49	13.41	30.61	29.87	31.83	70.36	56.19
2026-04-10	29.41	16.25	22.29	12.77	30.01	32.85	31.28	70.33	49.92
2026-04-11	29.41	15.76	21.22	12.23	29.39	34.28	30.56	68.95	46.32
2026-04-12	28.54	15.18	20.2	11.84	28.88	34.71	29.69	68.03	43.57
2026-04-13	27.31	14.42	19.21	11.49	28.13	35.44	29.29	66.75	41.11
2026-04-14	26.66	13.97	18.9	14.02	27.71	36.81	29.17	65.22	38.97
2026-04-15	26.05	14.28	18.08	13.53	27.55	36.76	28.32	63.52	36.94
2026-04-16	25.57	14.29	17.39	12.07	27.35	36.14	27.42	62.34	35.14
2026-04-17	24.33	13.96	16.78	10.83	27.08	35.04	26.42	61.11	33.65
2026-04-18	23.83	15.47	16.18	10.61	26.62	33.76	25.56	59.26	32.07
2026-04-19	23.29	16.21	15.61	10.2	26.05	32.68	24.62	57.3	30.39
2026-04-20	22.78	16.54	15.18	9.776	25.29	31.65	23.56	55.4	29.06
2026-04-21	22.37	16.59	17.12	9.437	24.28	37.09	22.98	53.87	27.8
2026-04-22	21.94	16.42	18.56	9.295	23.58	37.6	22.29	52.06	27.02
2026-04-23	21.54	16.14	18.3	9.082	23.14	34.91	22.02	50.31	27.24
2026-04-24	20.98	15.47	17.64	8.915	22.34	32.98	21.86	48.95	26.15
2026-04-25	20.23	14.47	17.21	8.804	22.88	31.75	21.53	48.21	25.01
2026-04-26	19.4	13.65	16.99	8.746	23.02	30.59	21.21	53.52	24.66
2026-04-27	18.77	12.87	16.66	8.605	22.53	30.16	20.88	53.8	24.25
2026-04-28	18.2	12.15	16.2	8.35	22.47	29.11	20.48	50.58	23.27
2026-04-29	17.67	11.57	15.41	8.014	22.22	28.11	19.84	49.17	22.14
2026-04-30	17.37	11.39	14.61	7.757	21.39	27.22	19.05	48.84	21.06
2026-05-01	16.66	11.26	14.07	7.44	20.58	26.84	18.45	47.76	20.55
2026-05-02	16.39	10.83	13.68	7.147	23.05	30.15	17.79	46.05	19.79
2026-05-03	16	10.33	13.1	6.781	24.01	30.86	17.42	44.27	18.86
2026-05-04	15.53	9.98	12.34	6.248	23.63	30.59	17.17	43.37	18.53
2026-05-05	15.6	9.719	11.67	5.611	23.31	29.83	16.93	42.71	18.9
2026-05-06	15.13	9.251	11.31	5.17	23.19	29.48	16.76	42.12	18.6
2026-05-07	14.52	8.719	11.47	5.218	22.04	28.82	16.42	41.16	18.24
2026-05-08	13.79	8.19	11.39	5.224	20.82	28.03	15.95	39.84	18.22
2026-05-09	13.47	7.86	11.29	5.569	19.7	27.02	15.58	39.12	20.73
2026-05-10	12.94	7.632	11.35	5.869	18.83	26.42	15.2	38.71	21.49
2026-05-11	12.29	7.428	13.45	6.094	18.23	25.42	14.85	38.07	20.6
2026-05-12	11.94	7.451	14.42	6.509	17.96	24.31	14.54	37.91	19.96
2026-05-13	11.36	7.471	14.59	6.858	17.46	23.18	14.11	38.16	19.81
2026-05-14	11.66	7.331	16.12	7.011	17.24	22.19	13.67	37.74	19.15
2026-05-15	11.68	7.137	17.8	7.17	17.34	21.27	13.49	37.58	18.12
2026-05-16	11.57	6.853	18.64	7.349	17.47	20.99	13.09	37.34	18.04
2026-05-17	11.48	6.588	18.3	7.622	17.35	20.53	12.54	37.23	17.95
2026-05-18	11.31	6.469	17.75	8.054	18.76	19.69	12.01	36.99	17.6
2026-05-19	11.24	6.339	16.75	8.476	19.2	19.32	11.64	36.05	17.19
2026-05-20	10.97	6.201	15.91	8.722	18.98	19.4	11.49	35.35	16.81
2026-05-21	10.49	6.047	14.88	8.621	18.88	19.09	11.35	34.17	16.6
2026-05-22	10.05	5.741	13.76	8.3	17.61	19.45	11.07	33.64	16.36
2026-05-23	9.649	5.374	12.78	7.853	16.67	19.3	10.8	32.63	15.9
2026-05-24	9.487	4.902	11.93	7.345	16	18.64	10.61	32.44	15.98
2026-05-25	9.26	4.519	11.3	6.801	16.27	18.78	10.24	31.95	15.36
2026-05-26	8.812	4.416	11.18	6.344	16.71	19.5	9.925	31.14	14.24
2026-05-27	8.563	4.564	11.69	6.749	18.19	20.19	9.563	30.54	12.94
2026-05-28	8.457	4.659	11.72	8.348	18.33	21.3	9.48	30.37	12.62
2026-05-29	8.447	4.855	11.34	8.97	17.78	21.54	9.35	30.17	11.99
2026-05-30	8.222	5.028	11.03	9.246	17.32	21.2	9.05	29.72	11.72
2026-05-31	7.704	5.082	11.03	9.497	17.02	20.17	8.971	28.7	11.71
2026-06-01	8.07	5.18	11.05	9.488	16.28	19.36	9.036	27.5	11.5
2026-06-02	8.08	4.994	11.02	9.142	15.59	18.09	9.435	26.23	11.49
2026-06-03	8.018	4.624	10.77	8.622	14.53	17	9.401	25	11.84
2026-06-04	7.856	3.824	10.38	7.994	13.86	16.47	9.339	23.94	12.22
2026-06-05	7.391	3.211	9.899	7.326	12.82	16.05	9.519	22.86	12.23
2026-06-06	6.675	2.97	9.43	6.754	11.96	16.12	9.639	21.79	11.94
2026-06-07	6.491	5.319	9.267	6.324	11.39	16.07	9.681	21.4	11.58
2026-06-08	6.56	6.505	9.155	6.353	11.56	28.5	10.2	20.68	11.67
2026-06-09	6.715	6.822	9.066	6.137	11.48	30.29	10.5	19.86	11.16
2026-06-10	6.772	7.11	9.057	5.862	11.27	27.44	10.97	19.5	10.13
2026-06-11	6.75	7.2	8.947	5.546	11.17	26.66	11.72	19.87	10.21
2026-06-12	8.337	6.857	8.72	5.216	11.23	27.21	12.35	19.46	10.19
2026-06-13	14.07	6.312	9.169	4.972	11.25	28.78	14.26	19.42	9.865
2026-06-14	26.88	5.779	11.72	7.407	11.21	30.48	14.05	18.59	10.1
2026-06-15	40.98	5.427	11.93	8.198	11.14	31.46	12.9	18.24	10.44
2026-06-16	48.34	5.174	10.97	8.126	11.05	38.13	11.9	18.16	10.49
2026-06-17	46.86	4.921	10.39	8.393	11.01	44.69	11.47	17.8	10.49
2026-06-18	40.89	4.708	9.942	8.604	10.89	58.66	11.25	17.21	10.58
2026-06-19	33.8	4.56	9.53	11.09	10.53	61.95	10.82	17.27	10.51
2026-06-20	27.44	4.359	9.165	11.25	10.04	59.56	10.2	17.48	10.36
2026-06-21	24.76	4.097	8.852	10.43	9.597	56.62	9.578	17.13	9.78
2026-06-22	22.74	3.798	8.641	9.94	9.113	53.3	9.107	17.5	9.261
2026-06-23	21.58	3.55	8.322	9.754	9.263	49.56	8.709	16.89	8.875
2026-06-24	21.44	3.422	7.978	9.649	9.342	46.53	8.207	16.7	8.07
2026-06-25	21.41	3.289	7.54	9.414	9.449	43.13	11.06	16.58	8.028
2026-06-26	21.41	3.249	7.116	9.129	9.479	57.05	11.82	16.35	7.983
2026-06-27	20.71	7.114	7.074	8.717	9.414	60.03	11.02	15.87	7.213
2026-06-28	19.67	9.617	6.89	8.277	9.366	61.5	10.5	13.98	6.631
2026-06-29	18.61	9.875	6.406	7.747	8.942	57.88	10.36	13.79	6.178
2026-06-30	17.52	10	5.82	7.276	8.23	52.58	10.38	13.6	6.348
2026-07-01	16.19	10.05	5.307	6.816	7.939	47.45	10.51	13.04	6.803
2026-07-02	15.36	10.27	5.105	6.401	8.015	42.88	10.58	13.74	7.067
2026-07-03	14.41	10.09	5.178	6.126	8.076	39.4	10.16	47.35	9.109
2026-07-04	13.32	9.328	5.299	6.096	8.307	35.69	9.457	51.69	9.586
2026-07-05	12.4	9.139	5.354	6.065	8.68	42.28	8.743	37.48	8.967
2026-07-06	12.09	8.509	8.194	6.012	8.719	43.71	8.049	25.19	8.152
2026-07-07	11.99	7.828	11.45	5.878	8.636	41.1	7.452	18.6	7.577
2026-07-08	11.62	7.425	11.89	5.859	8.334	37.35	7.186	14.61	7.126
2026-07-09	11.55	7.08	11.08	5.829	7.346	34.35	7.035	21.09	6.695
2026-07-10	11.52	6.809	10.11	5.683	6.556	31.6	6.949	22.63	6.203
2026-07-11	11.19	6.47	9.044	5.589	6.415	29.64	6.695	21.47	5.402
2026-07-12	10.71	6.155	8.008	5.435	6.126	28.55	6.503	20.18	5.099
2026-07-13	10.67	5.789	7.14	5.236	6.171	26.72	6.24	18.68	5.213
2026-07-14	10.73	5.505	6.374	5.179	6.184	25.88	5.673	17.03	5.264
2026-07-15	10.53	5.166	5.708	5.287	6.119	25.31	6.679	15.91	8.05
2026-07-16	10.22	4.927	4.883	6.15	5.842	23.98	10.71	15.01	11.37
2026-07-17	9.945	4.673	4.286	7.965	5.561	23.11	11.74	13.57	13.74
2026-07-18	9.545	4.489	3.889	9.61	5.376	22.57	11.3	12.08	17.09
2026-07-19	9.124	4.398	3.706	11.03	5.364	21.42	10.68	12.11	21.45
2026-07-20	8.684	4.291	3.69	11.8	5.36	21.12	10.1	11.81	25.1
2026-07-21	7.863	4.182	3.523	11.51	5.35	20.65	8.963	12.79	27.12
2026-07-22	7.778	4.194	3.161	10.9	5.403	20.16	7.599	13.41	26.8
2026-07-23	7.741	4.237	2.861	10.73	5.498	19.57	6.498	13.04	24.62
2026-07-24	7.768	4.272	3.11	10.31	5.625	19.4	5.49	12.62	21.92
2026-07-25	7.889	4.244	3.422	9.687	5.616	18.98	6.518	12.07	18.72
2026-07-26	7.959	4.224	3.691	9.058	6.24	18.47	6.842	11.81	16.27
2026-07-27	8.045	4.174	3.842	8.444	6.843	17.98	6.719	11.54	14.61
2026-07-28	7.988	4.171	3.95	7.89	6.675	17.76	6.696	11.06	13.36
2026-07-29	7.805	4.053	3.901	7.358	6.29	17.51	6.563	10.64	15.8
2026-07-30	7.548	3.817	3.707	6.702	6.017	16.82	6.163	9.907	15.39
2026-07-31	7.101	3.582	3.587	6.292	6.153	17.76	5.571	10.26	13.44
2026-08-01	6.653	3.502	3.41	5.883	6.218	18.71	4.845	10.76	11.72
2026-08-02	6.662	3.287	3.267	5.45	5.949	19.16	4.604	11.25	11.31
2026-08-03	6.719	3.197	3.017	4.869	5.639	18.91	4.274	12.22	11.03
2026-08-04	6.803	3.09	2.628	4.076	5.147	17.95	3.795	12.92	10.51
2026-08-05	6.821	3.061	2.625	3.785	4.693	16.73	3.614	13.1	9.986
2026-08-06	6.814	2.907	2.692	3.772	4.428	16.33	3.578	13.31	9.597
2026-08-07	6.681	2.65	2.77	3.777	4.261	15.81	3.518	14.01	9.273
2026-08-08	6.883	2.435	2.823	3.725	4.293	15.51	3.386	14.21	8.793
2026-08-09	11.34	4.794	2.84	3.624	4.198	15.14	3.348	14.34	8.24
2026-08-10	13.96	5.244	2.964	3.356	3.924	14.79	3.238	14.36	7.469
2026-08-11	15.17	4.668	3.122	3.116	3.727	14.3	3.243	13.72	6.555
2026-08-12	15.65	4.23	3.279	3.202	3.781	13.28	3.231	12.91	6.176
2026-08-13	15.28	3.996	3.259	3.349	3.802	13.32	3.165	16.2	5.868
2026-08-14	14.27	3.738	3.161	3.45	3.835	13.32	3.04	16.71	5.903
2026-08-15	12.99	3.397	2.969	3.468	3.833	13.12	3.026	15.17	6.027
2026-08-16	11.84	3.123	2.673	3.33	3.936	13.87	2.964	13.59	6.054
2026-08-17	10.71	2.846	2.464	2.714	4.099	13.68	2.927	12.28	5.963
2026-08-18	9.65	2.551	2.339	2.267	4.234	13.61	3.014	11.62	5.535
2026-08-19	8.687	2.206	2.168	2.035	4.225	13.31	3.033	10.93	5.138
2026-08-20	7.971	1.989	2.028	1.825	4.126	13.34	3.035	10.05	4.945
2026-08-21	7.666	2.031	1.992	1.718	4.038	12.63	3.031	9.026	5.017
2026-08-22	7.453	2.068	1.998	1.553	4.066	11.8	3.082	8.621	5.304
2026-08-23	7.358	2.06	1.99	1.695	4.037	11.61	3.071	8.614	5.39
2026-08-24	7.273	2.099	1.943	1.818	3.997	11.37	2.956	7.643	4.952
2026-08-25	7.066	1.94	1.89	2.051	3.86	11.36	2.978	7.673	3.941
2026-08-26	9.767	1.617	1.948	2.401	3.511	11.4	2.915	7.425	3.785
2026-08-27	10.49	1.727	2.004	2.8	3.563	13.43	2.634	7.162	3.937
2026-08-28	9.786	1.855	1.988	3.037	3.669	14.25	2.399	6.812	3.891
2026-08-29	9.064	1.939	2.046	3.184	3.88	24.4	2.44	6.86	3.74
2026-08-30	10.14	1.994	2.061	3.216	4.009	33.26	2.515	6.89	3.377
2026-08-31	12.03	1.997	2.044	3.111	4.07	36.84	2.593	10.54	12.56
2026-09-01	12.21	1.963	1.961	2.897	3.982	39.03	2.611	14.61	45.11
2026-09-02	11.77	1.889	1.813	2.619	3.871	40.08	2.618	28.22	73.61
2026-09-03	11.51	1.82	1.687	2.351	3.936	39.6	2.85	43.51	74.5
2026-09-04	11.08	1.742	1.608	2.097	3.802	37.94	3.04	48.59	64.72
2026-09-05	10.58	1.696	1.599	1.863	3.658	35.32	3.341	53.32	54.61
2026-09-06	11.66	1.691	1.69	1.789	3.429	31.96	3.519	53.62	44.79
2026-09-07	12.53	1.727	1.859	1.792	3.241	28.41	3.547	49.76	36.5
2026-09-08	14.41	1.737	1.983	1.842	3.129	25.41	3.403	43.96	29.18
2026-09-09	16.29	1.705	2.055	1.811	2.972	22.66	3.153	37.55	23.4
2026-09-10	18.97	1.619	2.216	1.885	2.847	22.61	3.031	31.83	19.29
2026-09-11	40.54	1.578	2.402	1.924	2.791	26.85	2.864	26.86	16.36
2026-09-12	79.55	2.108	2.536	1.973	2.774	28.61	2.784	22.77	14.01
2026-09-13	93.14	2.394	2.702	2.184	2.787	28.19	2.727	19.7	12.46
2026-09-14	97.68	2.567	2.856	2.376	2.785	27.09	2.549	17.89	10.76
2026-09-15	98.92	2.845	2.88	2.547	2.834	25.56	2.364	16.46	9.315
2026-09-16	94.18	3.157	2.816	2.669	2.841	23.54	2.477	15.04	8.316
2026-09-17	83.93	3.371	2.713	2.693	2.908	21.46	2.54	13.75	7.599
2026-09-18	71.46	3.414	2.552	2.619	3.058	19.45	2.608	13.06	7.201
2026-09-19	59.63	3.29	2.461	2.545	3.183	17.76	2.605	12.87	6.956
2026-09-20	56.67	3.168	2.397	2.443	3.302	16.28	2.535	12.99	6.76
2026-09-21	52.15	3.214	2.331	2.458	3.419	14.91	2.329	12.52	6.534
2026-09-22	47.21	3.14	2.27	2.373	3.541	13.74	2.012	11.82	6.36
2026-09-23	46.89	3.064	2.155	2.28	3.628	14.13	1.788	11.24	6.18
2026-09-24	44.37	3.019	2.053	2.219	3.615	13.95	1.871	10.76	6.075
2026-09-25	40.3	2.954	1.974	2.134	3.495	13.26	1.853	10.32	5.982
2026-09-26	36.42	2.831	1.916	1.992	3.305	12.42	1.908	9.955	5.884
2026-09-27	33.06	2.662	1.867	1.994	3.083	11.98	2.082	9.617	5.737
2026-09-28	30.14	2.492	1.821	1.98	2.988	11.41	2.22	9.375	5.649
2026-09-29	27.5	2.47	1.792	2.823	2.925	14.88	2.346	9.171	5.522
2026-09-30	25.31	3.561	1.784	3.178	2.891	15.3	2.428	9.032	5.443
2026-10-01	23.52	4.248	1.779	3.16	2.919	14.02	2.46	8.846	5.345
2026-10-02	22.11	4.625	1.767	3.073	2.935	12.93	2.459	8.667	5.226
2026-10-03	21.06	4.921	1.761	2.946	2.951	12.13	2.469	8.419	5.079
2026-10-04	20.12	5.138	1.746	2.756	2.937	13.75	2.561	8.135	4.976
2026-10-05	19.44	5.068	1.734	2.542	2.765	14.04	2.633	7.707	4.767
2026-10-06	18.85	4.833	1.71	2.34	2.799	13.43	2.679	7.38	4.611
2026-10-07	18.43	4.562	1.687	2.161	4.245	13.07	2.686	7.153	4.499
2026-10-08	17.95	4.297	1.642	1.974	10.96	12.62	3.223	7.003	4.543
2026-10-09	17.45	4.016	1.608	1.754	13.78	12.06	3.442	6.892	4.547
2026-10-10	16.97	3.816	1.591	1.627	13.39	11.25	3.376	6.716	4.571
2026-10-11	16.56	3.529	1.572	1.569	12.15	10.02	3.308	6.581	4.832
2026-10-12	16.17	3.21	1.564	1.545	10.66	9.336	3.205	6.599	5.3
2026-10-13	15.73	2.943	1.575	1.523	9.323	8.928	3.115	6.612	6.334
2026-10-14	15.31	2.737	1.6	1.535	7.93	8.62	2.988	6.649	7.596
2026-10-15	14.85	2.556	1.617	1.57	6.703	8.389	2.999	6.714	8.677
2026-10-16	14.47	2.499	1.839	1.572	6.773	8.328	2.93	6.731	9.228
2026-10-17	14.06	2.481	2.052	1.626	6.879	8.351	2.725	6.74	9.257
2026-10-18	13.67	2.542	2.199	1.826	6.651	8.191	2.574	8.873	8.947
2026-10-19	13.44	2.721	2.317	1.963	6.347	8.069	2.47	39.23	8.453
2026-10-20	13.28	3.929	2.387	2.054	6.017	7.884	2.373	55.13	7.884
2026-10-21	12.99	5.006	2.462	2.118	6.263	7.811	2.281	54.13	7.323
2026-10-22	12.81	6.245	2.452	2.133	6.015	7.73	2.205	49.44	6.81
2026-10-23	12.61	7.025	2.398	2.096	7.355	7.743	2.155	45.94	6.351
2026-10-24	12.36	7.421	2.329	2.034	28.72	7.868	2.13	41.49	5.97
2026-10-25	12.11	7.505	2.264	1.957	38.05	7.91	2.087	36.31	5.682
2026-10-26	11.9	7.26	2.2	1.879	37.89	7.905	2.062	31.31	5.458
2026-10-27	11.64	6.746	2.126	1.82	35.83	7.841	2.045	26.95	5.257
2026-10-28	11.36	6.113	2.055	1.773	32.72	7.569	2.033	23.43	5.087
2026-10-29	11.09	5.465	1.994	1.73	28.46	7.366	1.943	20.56	4.956
2026-10-30	10.84	4.885	1.938	1.665	23.8	7.268	1.867	18.25	4.84
2026-10-31	10.62	4.449	1.891	1.595	20.82	7.263	1.839	16.52	4.743
2026-11-01	11.71	5.242	1.92	1.546	18.06	7.237	1.837	15.12	4.721
2026-11-02	12.13	5.88	3.904	2.356	15.66	7.237	1.808	13.98	4.669
2026-11-03	12.05	6.511	4.707	3.977	13.89	7.134	1.786	13.18	4.611
2026-11-04	11.86	7.234	4.642	5.166	14.61	6.989	1.789	13.47	8.129
2026-11-05	11.55	7.714	4.231	5.989	17.58	8.004	1.798	13.09	10.27
2026-11-06	11.13	7.755	3.776	6.619	20.84	8.238	1.962	13.72	13.54
2026-11-07	10.64	7.663	4.307	6.929	21.54	7.918	2.003	20.04	21.3
2026-11-08	10.04	7.809	4.724	7.061	21.26	7.78	1.968	25.86	26.46
2026-11-09	9.574	8.13	4.498	7.163	20.75	7.729	2.056	30.55	29.5
2026-11-10	9.006	8.219	4.076	7.26	20.93	7.812	2.074	34.45	33.02
2026-11-11	8.601	8.199	3.699	7.365	19.98	8.166	2.05	36.35	34.66
2026-11-12	10.19	8.122	3.333	7.49	18.56	8.315	2.028	35.86	35.09
2026-11-13	11.05	7.918	3.021	7.518	17.3	14.76	1.992	34.04	35.32
2026-11-14	12.13	7.679	2.75	7.359	16.35	16.43	1.926	35.2	34.09
2026-11-15	14.12	7.902	2.521	7.021	16	15.14	2.027	46.61	32.02
2026-11-16	15.56	7.9	2.329	6.562	21.81	21.7	2.009	51.5	29.91
2026-11-17	16.31	7.738	2.153	6.063	26.24	24.5	1.925	53.11	29.51
2026-11-18	16.65	7.685	2.034	5.573	35.6	24.53	1.847	52.15	45.97
2026-11-19	16.54	7.56	1.996	5.145	40.36	24.72	1.792	49.18	52.61
2026-11-20	16.1	7.398	2.679	6.506	41.76	24.99	1.748	45.25	52.43
2026-11-21	15.52	7.203	2.959	7.021	42.11	24.7	1.728	41.06	50.85
2026-11-22	14.87	6.965	2.932	7.076	41.05	23.72	1.692	38.89	52.45
2026-11-23	14.26	6.93	3.688	7.324	38.73	22.26	2.068	37.94	51.65
2026-11-24	13.84	6.813	5.397	8.525	35.64	20.67	2.147	37.76	50.1
2026-11-25	15.02	6.75	6.704	9.552	32.35	19.13	2.034	38.68	50.77
2026-11-26	17.98	6.711	8.549	10.23	29.15	17.8	1.904	40.23	51.43
2026-11-27	19.06	6.661	9.346	10.64	26.34	16.73	1.835	41.64	51.36
2026-11-28	19.97	6.594	9.342	10.89	24	15.85	1.781	43.35	50.74
2026-11-29	20.53	6.519	8.963	10.83	22.04	15.18	1.734	43.66	53.29
2026-11-30	20.81	6.425	8.301	10.44	20.42	14.63	1.695	42.97	54.24
2026-12-01	24.77	8.987	7.48	10.28	19.17	14.2	1.684	43.62	53.95
2026-12-02	26.22	10.63	6.637	9.659	18.16	13.84	1.683	43.78	53.23
2026-12-03	26.07	11.63	5.846	8.767	17.26	14.35	1.676	43.57	51.85
2026-12-04	26.13	13.21	5.14	7.96	16.51	16.3	1.673	43.38	49.85
2026-12-05	28.86	15.39	4.544	7.353	15.88	19.2	2.417	43	47.56
2026-12-06	29.87	17.81	4.074	6.917	15.59	21.1	2.776	42.34	45.3
2026-12-07	30.17	19.46	3.691	6.584	15.37	22.11	2.779	41.38	43.25
2026-12-08	30.6	19.83	3.384	6.309	15.17	22.49	2.705	40.22	41.43
2026-12-09	35.17	22.03	3.139	6.078	15.19	22.18	2.66	38.98	39.86
2026-12-10	37.03	22.94	2.936	5.878	15.17	21.89	2.62	37.76	38.68
2026-12-11	37.95	22.83	2.78	5.704	15.16	22.22	2.612	36.62	37.67
2026-12-12	37.82	22.52	2.662	5.543	14.99	24.45	3.31	35.58	36.94
2026-12-13	37.37	22.03	2.547	5.393	14.71	28.12	3.38	34.64	36.25
2026-12-14	37.42	21.67	2.434	5.248	14.39	30.65	3.051	33.81	35.64
2026-12-15	37.18	20.87	2.338	5.098	14.04	32.2	3.08	33.07	35.11
2026-12-16	36.53	19.89	2.245	4.945	13.66	32.4	3.487	32.39	34.61
2026-12-17	35.9	21.07	2.187	4.834	13.27	31.65	3.537	31.76	34.08
2026-12-18	35.08	21.23	2.148	4.734	12.95	30.58	4.073	31.17	33.53
2026-12-19	34.28	20.35	2.111	4.645	12.66	29.71	4.28	30.58	32.91
2026-12-20	33.74	39.36	2.072	4.617	12.38	29.58	6.885	30.03	32.28
2026-12-21	33.24	47.89	2.182	6.804	12.11	44.14	8.021	29.48	31.63
2026-12-22	32.79	46.71	2.234	8.057	11.86	61.8	8.429	28.94	30.99
2026-12-23	32.38	44.74	2.275	8.4	11.63	65.52	8.923	28.41	30.35
2026-12-24	31.94	43.2	2.304	8.576	11.41	61.64	8.926	27.9	29.74
2026-12-25	31.45	41.2	2.282	8.603	11.21	56.73	8.557	27.4	29.15
2026-12-26	30.95	38.62	2.233	8.438	11	52.54	8.029	26.88	28.56
2026-12-27	30.43	35.81	2.215	8.115	10.82	49.42	7.435	26.37	27.99
2026-12-28	29.88	33.07	2.311	7.718	10.65	61.3	6.811	25.87	27.42
2026-12-29	29.38	30.6	2.543	7.319	10.51	66.98	6.198	25.37	26.86
2026-12-30	28.88	28.49	2.811	6.94	10.41	65.5	5.646	24.89	26.34
2026-12-31	28.4	26.74	2.968	6.725	10.3	64.13	5.174	24.41	25.8
2027-01-01	27.97	25.32	2.952	6.54	10.16	64.27	4.802	23.94	25.26
2027-01-02	27.56	24.14	3.475	7.222	9.95	64.07	4.514	23.48	24.75
2027-01-03	27.11	23.17	3.981	9.361	9.674	63.03	4.291	23	24.21
2027-01-04	26.71	22.3	4.36	11.28	9.469	61.46	4.1	22.53	23.69
2027-01-05	26.3	21.61	4.607	12.97	9.324	59.54	3.948	22.08	23.19
2027-01-06	25.87	21.11	4.587	14.28	9.162	57.51	3.841	21.62	22.72
2027-01-07	25.43	20.69	4.285	14.84	9.017	55.87	3.746	21.19	22.26
2027-01-08	25.05	20.28	3.846	14.65	8.846	55.03	3.658	20.77	21.81
2027-01-09	24.66	19.82	3.381	13.93	9.695	55.15	3.613	20.37	21.38
2027-01-10	24.26	19.31	2.97	12.96	20.86	55.67	3.568	19.97	21
2027-01-11	23.88	18.78	6.933	11.99	29.87	55.91	3.511	19.59	20.55
2027-01-12	23.47	18.24	13.05	12.2	35.31	55.53	3.45	19.22	20.13
2027-01-13	23.09	17.76	17.38	13.21	38.91	54.51	3.576	18.83	19.68
2027-01-14	22.7	17.31	20.66	15.03	41.26	53.15	3.842	18.45	19.24
2027-01-15	22.29	16.84	24.96	22.52	40.36	51.62	4.317	18.08	18.85
2027-01-16	21.78	16.4	28.29	29.05	37.18	50.18	10.22	17.72	18.48
2027-01-17	21.4	15.97	29.52	32.38	33.48	48.83	15.14	17.36	18.1
2027-01-18	20.94	15.53	29.35	34.3	30	47.55	18.93	17.01	17.69
2027-01-19	20.51	15.16	28.34	35.4	26.98	46.39	21.94	16.68	17.39
2027-01-20	20.13	14.79	26.6	36.93	24.46	45.3	23.09	16.33	17.04
2027-01-21	19.7	14.44	24.24	36.62	22.78	44.25	22.03	15.98	16.64
2027-01-22	19.27	14.1	21.6	35.05	21.38	43.25	19.37	15.68	16.31
2027-01-23	20.91	13.73	18.92	33.76	20.32	42.34	16.19	15.38	15.93
2027-01-24	22.38	14.89	16.45	32.41	19.53	41.47	13.26	15.07	15.59
2027-01-25	24.97	22.05	14.36	30.98	18.99	40.6	10.9	14.81	15.29
2027-01-26	31.85	30.98	12.68	29.46	24.04	39.77	9.117	14.56	14.98
2027-01-27	42.98	47.55	11.33	27.84	26.61	38.95	7.767	14.27	14.68
2027-01-28	54.42	57.48	10.21	26.1	26.92	38.13	6.734	13.99	14.38
2027-01-29	59.6	61.3	9.31	25.01	27.07	37.31	5.946	13.7	14.06
2027-01-30	60.57	62.21	8.566	24	27.07	36.47	5.361	13.42	13.8
2027-01-31	58.58	60.37	7.963	22.53	26.6	35.64	4.889	13.15	13.54
2027-02-01	53.79	55.68	7.454	21.02	25.62	34.85	4.507	12.87	13.26
2027-02-02	47.19	49.21	7.066	19.93	24.39	34.12	4.202	12.6	13
2027-02-03	40.34	42.27	6.743	19.07	23.14	33.39	3.94	12.37	12.74
2027-02-04	34.23	35.9	6.436	18.35	21.97	32.67	3.728	12.14	12.51
2027-02-05	29.3	31.17	6.174	17.79	20.99	31.98	3.543	11.91	12.29
2027-02-06	25.59	27.39	5.954	17.29	20.18	31.32	3.387	11.68	12.08
2027-02-07	22.86	24.24	5.752	16.85	19.45	30.68	3.258	11.46	11.86
2027-02-08	20.77	21.64	5.566	16.41	18.84	30.03	3.133	11.27	11.62
2027-02-09	19.18	19.54	5.383	15.95	18.39	29.41	3.019	11.06	11.37
2027-02-10	18.02	17.79	5.21	15.49	17.86	28.8	2.901	10.82	11.15
2027-02-11	17.02	16.32	5.027	15.07	17.43	28.16	2.827	10.61	10.96
2027-02-12	23.03	16.87	4.845	14.62	17	27.57	2.739	10.4	10.78
2027-02-13	25.36	16.81	4.674	14.3	16.65	26.99	2.667	10.22	10.6
2027-02-14	24.72	16.55	4.533	13.92	16.33	26.36	2.597	10	10.42
2027-02-15	24.22	17.11	4.388	13.53	16.03	25.75	2.551	9.817	10.17
2027-02-16	23.9	18.33	4.271	13.18	15.72	25.19	2.471	9.645	9.926
2027-02-17	23.19	19.35	4.166	12.86	15.44	24.63	2.394	9.463	9.711
2027-02-18	21.85	19.5	4.067	12.54	15.1	24.1	2.312	9.279	9.495
2027-02-19	20.26	18.69	3.978	12.26	20.18	23.59	2.245	9.104	9.256
2027-02-20	18.69	17.3	3.886	11.97	22.3	23.12	2.205	8.87	9.047
2027-02-21	17.35	15.77	3.793	11.71	21.37	22.66	2.137	8.664	8.868
2027-02-22	16.17	14.4	3.719	11.48	20.21	22.18	2.082	8.448	8.668
2027-02-23	15.16	13.22	3.622	11.22	19.11	21.75	2.021	8.302	8.51
2027-02-24	14.34	12.32	3.536	10.98	17.96	21.35	1.926	8.132	8.366
2027-02-25	13.74	11.56	3.434	10.74	18.8	20.81	1.877	8.025	8.246
2027-02-26	13.21	10.89	3.33	10.49	18.68	20.31	1.822	7.954	8.252
2027-02-27	12.75	10.35	3.233	10.24	44.31	19.84	1.828	7.803	8.257
2027-02-28	12.37	9.857	3.143	9.977	72.15	19.4	1.834	7.671	8.887
2027-03-01	12.99	9.432	3.059	9.741	86.97	18.99	1.754	7.191	10.22
2027-03-02	12.95	12.39	2.991	9.508	97.77	18.57	1.612	7.067	11.89
2027-03-03	12.58	21.49	2.936	9.287	106.7	18.2	1.614	7.093	13.38
2027-03-04	12.51	37.17	2.867	9.078	111.3	17.86	2.369	7.081	15.04
2027-03-05	12.52	47.95	2.804	8.848	110.2	17.48	3.598	6.878	16
2027-03-06	12.34	51.7	2.723	8.62	105.2	17.13	5.16	6.669	15.86
2027-03-07	11.97	52.64	2.674	8.404	97.68	16.79	6.401	6.592	15.69
2027-03-08	11.52	50.85	2.595	8.203	89.62	16.45	8.337	6.451	17.71
2027-03-09	11.03	46.95	2.533	7.994	80.81	16.11	12.32	6.419	23.02
2027-03-10	10.6	41.89	2.461	7.795	72.3	15.76	20.7	6.314	29.62
2027-03-11	10.26	37.1	2.451	7.595	64.46	15.46	37.32	6.177	34.43
2027-03-12	10	32.9	11.25	7.435	57.81	15.15	52.78	6.044	35.61
2027-03-13	9.713	28.96	32.25	7.362	52.23	14.86	64.92	5.882	33.74
2027-03-14	9.473	25.15	48.88	7.55	47.6	14.54	73.09	5.811	50.12
2027-03-15	9.271	21.75	62.36	8.35	43.96	14.25	75.72	5.705	70.46
2027-03-16	9.036	18.9	73.32	14.5	40.57	13.96	74.18	5.635	94.03
2027-03-17	8.851	16.64	77.8	30.67	37.53	13.69	69.16	5.579	115.5
2027-03-18	8.716	14.83	74.65	64.75	35.07	13.46	61.76	5.537	135.5
2027-03-19	8.411	13.56	77.74	141.3	33.7	13.15	53.72	5.347	144.3
2027-03-20	9.69	12.52	100.2	189.5	36.25	12.92	46.36	5.248	142.4
2027-03-21	10.71	11.64	123.5	207.7	35.53	12.67	47.3	5.193	133.8
2027-03-22	11.08	10.93	140.9	212.7	33.04	12.39	49.18	5.148	122.1
2027-03-23	11.01	10.31	156.6	206	30.91	12.1	54.82	5.072	110
2027-03-24	10.54	9.792	166.3	189.7	28.75	11.86	60.44	4.942	98.51
2027-03-25	9.814	9.295	165.4	167.4	26.91	11.61	60.16	4.718	88.1
2027-03-26	9.029	9.686	155.6	143.9	25.24	11.74	58.64	4.659	79.05
2027-03-27	8.109	21.6	141.2	122.3	23.89	19.16	58.49	4.593	75.95
2027-03-28	7.484	31	125.3	104	22.51	34.56	59.13	4.538	76.57
2027-03-29	7.135	38.67	110.2	88.92	21.1	67.46	59.04	7.163	95.87
2027-03-30	6.839	50.38	98.64	77.3	20.42	111	58.19	6.927	129
2027-03-31	6.421	67.97	88.15	68.54	19.75	139.9	56.19	5.907	139.1
2027-04-01	6.376	79.34	78.52	61.49	19.15	153.4	53.24	14.9	135.9
2027-04-02	10.46	85.94	70.53	55.7	19.34	154.8	49.81	43.08	131.4
2027-04-03	19.02	88.85	64.13	50.92	19.07	147	46.33	98.95	127
2027-04-04	32.91	87.8	58.85	47.1	18.51	134	42.98	177.8	120.3
2027-04-05	52.83	83.92	54.26	43.7	18.04	119.1	39.93	251.7	112.2
2027-04-06	71.71	79.59	50.81	40.78	17.53	105.6	37.34	315.9	103.6
2027-04-07	85.87	76.22	47.25	38.12	23.64	94.83	36.02	361.2	95.45
2027-04-08	97.59	73.97	43.63	35.63	26.49	86.62	34.27	377.1	90.2
2027-04-09	109.3	72.15	40	33.44	27.21	79.09	32.54	364	84.74
2027-04-10	118	70.06	36.65	31.28	27.71	72.56	32.19	331.5	79.41
2027-04-11	125.8	67.61	33.83	29.2	28.18	66.3	31.05	291.8	75.04
2027-04-12	139	64.73	31.88	28.2	27.9	61.04	29.38	253	71.6
2027-04-13	158.2	61.22	30.11	27.16	26.7	56.71	27.65	218.3	68.43
2027-04-14	193.7	57.44	28.49	26.1	25.1	53.27	26.89	191.2	67.88
2027-04-15	223.4	55.38	26.97	25.13	23.15	50.06	25.68	168	66.23
2027-04-16	228.9	52.53	29.34	24.22	21.4	46.93	24.79	148.3	64.22
2027-04-17	216.6	49.51	29.47	23.27	19.8	44.08	24.12	133.3	63.06
2027-04-18	213.8	48.96	27.76	21.76	18.47	41.64	24.45	122.6	62.04
2027-04-19	209.8	47.47	26.32	20.92	17.76	39.44	24.67	115.5	60.46
2027-04-20	196.6	45.23	25.3	20.18	17.24	37.66	24.72	110.5	58.59
2027-04-21	183	43.09	24.29	19.15	16.41	36.03	24.8	106.5	56.79
2027-04-22	172.4	41.43	23.03	18.45	16.17	34.49	25.16	102.6	55.32
2027-04-23	163.3	39.76	21.51	17.8	15.72	33.35	24.96	97.86	53.77
2027-04-24	154	37.89	20.09	17.18	15.15	32.46	24.55	92.5	51.93
2027-04-25	145.6	36.33	18.88	16.4	14.87	31.31	23.64	86.89	50.49
2027-04-26	137.1	34.66	17.75	15.39	14.91	30.08	22.09	81.39	49.69
2027-04-27	129	33.63	17.24	14.42	15.33	28.72	21.69	76.42	48.33
2027-04-28	122.7	32.69	17.06	13.67	15.27	27.32	21.02	72	46.91
2027-04-29	117.7	31.66	16.52	13.09	14.78	27.05	20.41	68.7	45.58
2027-04-30	112.1	30.57	15.78	12.71	14.04	26.58	19.63	65.45	44.18
2027-05-01	106.6	29.49	15.22	12.51	13.03	25.62	18.95	62.63	42.51
2027-05-02	101.6	28.55	14.35	12.11	11.92	24.51	18.59	61.19	41.18
2027-05-03	96.73	27.15	13.64	11.74	11.5	23.64	18.01	58.97	40.36
2027-05-04	92.38	26.07	13.11	11.34	11.42	22.8	17.53	57.08	39.13
2027-05-05	90.24	25.6	12.76	11.15	11.05	22.3	17.02	55.6	37.48
2027-05-06	93.62	24.83	12.76	11.26	10.69	22.52	16.79	54.34	35.86
2027-05-07	94.5	24.72	12.7	11.28	10.5	22.15	16.36	52.96	34.44
2027-05-08	94.46	24.35	12.41	11.16	10.37	22	15.5	51.41	33.57
2027-05-09	94.21	24.03	11.99	10.96	10.41	21.25	15.12	50.09	32.54
2027-05-10	93.28	23.5	11.43	10.63	10.58	20.35	15.03	48.65	31.35
2027-05-11	93.46	23.2	11.16	10.32	12.75	19.87	14.71	46.92	30.67
2027-05-12	92.04	22.74	10.92	10.33	15.64	19.21	14.24	45.38	30.2
2027-05-13	88.77	22.24	10.5	10.11	16.53	18.4	13.87	44.48	30.73
2027-05-14	84.93	21.68	10.1	9.616	16.27	17.41	14.04	43.29	30.87
2027-05-15	81.67	20.97	9.732	9.097	15.6	16.78	13.81	41.71	30.13
2027-05-16	78.32	19.85	9.372	8.725	14.87	16.73	13.89	40.73	29.91
2027-05-17	75.36	18.98	9.015	8.388	13.72	16.45	14.47	39.73	29.32
2027-05-18	72.55	17.93	8.618	8.061	12.74	15.96	15.26	38.62	28.5
2027-05-19	99.85	17.44	8.436	7.647	11.93	15.71	15.74	37.72	27.68
2027-05-20	103.4	17.4	8.632	7.174	11.39	15.15	16.41	36.73	27.09
2027-05-21	92.6	17.5	8.75	6.917	11.11	14.23	16.77	35.79	26.19
2027-05-22	82.49	16.96	8.706	6.677	10.64	13.68	16.34	34.84	25.33
2027-05-23	77.63	16.21	8.57	6.587	10.77	12.97	15.58	36.92	24.58
2027-05-24	75.34	15.89	8.223	6.34	10.7	13.95	14.53	36.72	23.69
2027-05-25	74.25	15.72	7.666	5.988	10.57	14.03	13.47	35.72	23.07
2027-05-26	72.42	15.8	7.256	5.741	10.33	13.8	12.8	37.4	22.66
2027-05-27	70.46	15.85	6.914	5.586	9.81	13.05	12.42	38.11	22.09
2027-05-28	68.35	15.89	6.583	6.06	15.03	14.14	11.92	37.36	22.08
2027-05-29	65.92	15.75	6.328	6.544	16.66	15.13	11.22	39.19	21.57
2027-05-30	63.93	15.72	6.279	6.884	15.41	15.49	11.19	38.94	21.87
2027-05-31	62.77	15.45	6.321	7.001	13.9	15.39	12.37	36.83	21.87
2027-06-01	60.98	15.3	6.245	6.925	12.77	14.58	12.83	34.4	21.38
2027-06-02	59.22	15.74	6.21	8.47	11.87	13.69	12.66	32.65	21.57
2027-06-03	57.77	16.02	6.226	8.043	10.82	12.33	12.51	30.77	21.06
2027-06-04	56.4	15.56	6.1	6.476	10.01	11.76	12.41	29.06	19.64
2027-06-05	54.9	14.87	5.766	5.552	9.145	11.68	11.79	27.32	18.5
2027-06-06	53.59	14.51	5.457	4.892	8.64	11.2	11.23	27.58	17.62
2027-06-07	52.24	14.58	5.575	4.623	8.175	11.11	10.74	29.47	17.38
2027-06-08	51.7	14.39	5.723	4.416	7.961	11.11	10.72	31.86	17.14
2027-06-09	50.81	13.88	5.824	4.913	7.786	10.49	10.5	34.18	17.19
2027-06-10	49.59	13.17	6.502	5.519	7.66	11.37	10.21	35.53	17.11
2027-06-11	48.54	12.6	6.833	6.159	7.5	11.55	9.961	35.25	16.88
2027-06-12	47.67	11.53	8.067	6.7	7.507	11.34	9.368	38.49	19.22
2027-06-13	46.93	11.16	8.946	6.812	7.4	11.15	8.874	38.36	21.11
2027-06-14	45.71	11.12	8.279	6.617	7.038	10.88	8.418	35.11	20.65
2027-06-15	43.92	10.72	7.216	6.376	6.614	10.34	8.064	32.01	19.21
2027-06-16	42.65	10.41	8.316	5.843	6.375	9.678	7.723	29.68	17.81
2027-06-17	42.23	10.17	11.86	5.265	6.275	9.105	7.47	28	16.71
2027-06-18	41.73	9.849	16.71	4.8	6.265	8.978	7.391	28.65	16.35
2027-06-19	40.82	9.566	29.53	4.292	6.102	9.116	7.186	28.67	16.26
2027-06-20	40.73	9.214	34.89	3.952	6.092	9.013	6.99	28.05	15.46
2027-06-21	39.64	8.871	34.48	3.818	5.927	8.558	6.709	27.52	15
2027-06-22	38.34	8.623	31.45	3.85	5.921	7.936	6.371	27.27	14.61
2027-06-23	37.03	8.366	27.42	4.074	5.721	7.47	5.937	26.7	14
2027-06-24	39.39	8.511	23.1	4.413	5.283	7.294	5.29	27.26	15.88
2027-06-25	41.3	8.624	18.95	4.672	5.066	7.285	5.123	27.14	15.93
2027-06-26	41.5	8.721	16.29	4.982	4.996	7.018	5.139	26.47	15.14
2027-06-27	40.73	8.722	17.7	5.195	4.974	6.621	5.161	25.53	14.28
2027-06-28	39.75	8.615	18.76	6.109	5.129	6.514	5.29	24.55	12.87
2027-06-29	40.32	8.442	18.62	6.452	5.181	6.446	5.405	24.04	11.54
2027-06-30	40.57	7.869	19.41	6.564	5.104	6.343	5.491	23.42	11.71
2027-07-01	40.02	7.219	19.15	6.546	4.966	6.371	5.512	33.62	11.55
2027-07-02	38.35	6.938	18.94	6.377	4.705	6.438	5.501	37.91	11.16
2027-07-03	36.2	6.675	18.07	6.134	4.436	6.419	5.486	36.23	10.78
2027-07-04	34.82	6.316	16.68	5.885	4.04	6.224	5.434	36.68	17.81
2027-07-05	33.92	5.899	15.86	5.607	4.085	5.905	5.08	37.04	19.11
2027-07-06	32.64	5.653	16.04	10.31	4.206	5.807	4.666	36.8	17.06
2027-07-07	31.1	5.491	16.28	12.65	4.358	5.528	4.356	36.05	15.16
2027-07-08	29.46	5.205	15.91	13.02	4.437	5.359	4.13	34.65	13.27
2027-07-09	27.85	4.536	15.69	12.85	4.435	5.097	4.137	33.36	11.69
2027-07-10	27.46	4.528	15.68	12.05	4.506	5.042	4.059	31.03	10.23
2027-07-11	26.96	4.563	15.14	11.08	4.73	4.626	3.953	28.62	8.718
2027-07-12	26.63	4.597	14.31	9.656	4.684	4.485	3.949	27.32	8.554
2027-07-13	25.47	4.675	13.38	14.24	4.504	4.572	3.873	27.49	8.376
2027-07-14	24.8	4.668	12.52	13.82	4.34	4.537	3.921	28.11	8.64
2027-07-15	23.64	4.562	11.84	10.46	4.467	4.627	3.755	27.89	8.747
2027-07-16	22.68	4.463	11.42	7.695	4.442	4.61	3.55	27.09	8.699
2027-07-17	22.67	4.119	11.18	6.152	4.304	4.495	3.674	26.1	8.393
2027-07-18	22.57	4.074	10.9	5.267	4.27	4.514	3.813	25.07	7.802
2027-07-19	24.42	4.02	10.83	4.623	4.112	4.876	3.781	24.19	7.821
2027-07-20	23.99	4.057	10.7	4.188	3.638	5.38	3.699	23.35	8.026
2027-07-21	23	4.07	10.75	4.061	3.358	5.744	3.496	23.22	8.048
2027-07-22	22.2	4.026	10.79	4.038	3.482	5.794	3.089	22.98	7.875
2027-07-23	21.41	3.864	10.8	3.852	3.639	5.639	2.886	22.33	7.208
2027-07-24	20.13	3.489	10.79	3.63	3.74	5.427	2.643	23.71	6.656
2027-07-25	20.27	3.272	10.69	3.599	3.767	5.184	2.493	23.41	6.695
2027-07-26	20.14	3.135	10.49	4.38	3.688	6.865	2.711	22.59	6.661
2027-07-27	19.61	2.962	10.41	4.9	3.591	9.235	2.845	21.95	6.184
2027-07-28	19.15	2.868	10.27	4.993	3.298	11.34	2.891	20.76	5.607
2027-07-29	18.29	2.859	10.29	4.94	3.147	12.63	2.835	20.2	5.742
2027-07-30	17.42	2.902	10.21	4.813	3.077	12.45	2.897	19.69	5.827
2027-07-31	17.75	2.945	10.07	4.526	3.168	11.51	2.938	18.62	5.91
2027-08-01	17.79	2.938	9.834	4.1	3.231	10.06	2.961	17.23	5.846
2027-08-02	17.9	2.837	9.555	3.502	3.242	8.931	3.009	17.21	5.571
2027-08-03	17.62	2.797	9.237	5.425	3.149	8.295	3.099	16.28	5.109
2027-08-04	17.37	2.798	8.943	6.248	3.042	7.87	3.3	16.2	4.936
2027-08-05	16.89	2.9	8.625	5.958	2.737	7.701	3.483	16.04	5.011
2027-08-06	16.64	3.122	8.501	6.03	2.475	8.129	3.588	16.05	4.927
2027-08-07	16.12	3.262	8.435	6.373	2.366	8.739	3.646	15.96	4.657
2027-08-08	16.1	3.508	8.397	6.609	2.331	9.989	3.582	15.9	4.643
2027-08-09	16.08	3.56	8.363	6.589	2.317	10.68	3.533	15.61	4.76
2027-08-10	16.12	3.435	8.309	6.475	2.293	11.43	3.42	15.51	5.137
2027-08-11	16.64	3.335	8.208	6.234	2.556	11.92	3.316	15.17	5.445
2027-08-12	16.79	3.303	7.919	5.892	2.703	11.84	3.359	15.02	5.752
2027-08-13	16.33	3.313	7.398	5.359	2.744	11.16	3.28	14.22	6.063
2027-08-14	15.92	3.341	6.994	10.37	2.676	10.74	3.22	14.03	6.287
2027-08-15	15.72	3.396	6.821	11.19	2.523	10.1	3.121	13.8	6.31
2027-08-16	15.35	3.463	6.878	8.882	2.356	9.256	3.093	13.1	6.014
2027-08-17	15.32	3.5	6.899	6.74	2.109	8.645	2.91	13	5.793
2027-08-18	15.09	3.449	6.952	5.611	2.023	8.21	5.777	13	5.681
2027-08-19	14.79	3.364	6.939	5.164	1.921	8.041	7.074	12.95	5.607
2027-08-20	14.07	3.232	6.931	4.723	2.433	7.879	7.154	12.27	5.36
2027-08-21	14.32	2.992	6.843	4.375	2.532	7.658	7.42	12.27	5.195
2027-08-22	14.34	2.716	6.642	4.087	2.427	7.318	7.87	12.56	5.241
2027-08-23	14.61	2.456	6.145	3.735	2.341	7.073	19.35	12.48	5.415
2027-08-24	14.83	2.281	5.812	3.116	2.26	6.837	20.76	12.42	5.466
2027-08-25	14.89	2.205	5.824	2.625	2.148	6.722	15.99	12.59	5.628
2027-08-26	14.53	2.125	7.69	2.346	2.028	6.749	13.56	12.6	5.819
2027-08-27	14.08	2.036	8.9	9.293	2.032	6.675	11.67	12.43	6.488
2027-08-28	13.44	1.975	9.724	12	1.971	6.565	9.573	12.18	7.005
2027-08-29	13.05	1.914	9.902	11.38	1.856	6.417	8.103	11.74	7.056
2027-08-30	12.53	1.755	9.617	10.21	1.72	6.191	7.093	11.58	6.935
2027-08-31	12.46	1.732	9.056	9.203	1.558	6.203	6.361	11.45	6.831
2027-09-01	14.6	1.702	8.381	7.965	1.518	6.035	5.783	11.76	6.779
2027-09-02	15.38	1.693	7.767	6.943	1.431	5.805	7.654	11.93	7.696
2027-09-03	15.55	1.666	7.116	6.213	1.436	5.506	9.569	12.02	8.127
2027-09-04	15.35	1.694	6.567	5.835	1.406	5.157	9.275	11.87	8.397
2027-09-05	15.34	1.721	6.32	5.703	1.314	4.409	8.448	11.67	8.682
2027-09-06	15.01	1.709	6.05	5.41	1.257	4.009	7.81	11.46	8.74
2027-09-07	14.22	1.608	5.479	4.881	1.22	4.021	7.263	10.67	8.562
2027-09-08	13.3	1.562	12.76	4.531	1.29	3.819	6.679	10.13	8.199
2027-09-09	12.02	1.556	14.8	4.184	1.444	3.639	6.682	9.763	7.686
2027-09-10	11.35	1.627	12.54	3.924	1.674	3.543	6.362	9.755	8.556
2027-09-11	11.05	1.695	10.56	3.78	1.774	3.601	6.091	9.74	9.412
2027-09-12	10.83	1.701	9.309	3.669	1.779	3.462	5.906	9.701	9.935
2027-09-13	10.53	1.699	8.431	3.691	1.877	3.171	5.725	9.63	10.12
2027-09-14	10.22	1.69	7.573	3.653	1.917	2.729	5.322	9.44	10.24
2027-09-15	9.833	1.651	6.684	3.507	1.887	2.705	4.842	9.351	10.81
2027-09-16	18.1	1.621	5.871	3.341	1.839	2.695	4.263	9.226	11.36
2027-09-17	18.72	1.665	5.159	3.229	1.769	3.197	3.771	9.231	11.53
2027-09-18	16.89	1.683	5.012	3.033	1.872	4.081	3.488	9.326	11.29
2027-09-19	15.49	1.792	9.381	8.545	1.961	5.151	3.39	9.345	10.83
2027-09-20	14.39	1.869	13.86	15.51	2.004	6.074	3.913	9.335	9.95
2027-09-21	13.84	1.847	16.56	16.23	2.008	6.639	4.248	9.272	8.963
2027-09-22	17.51	1.805	19.3	14.97	1.967	6.925	4.316	8.97	7.998
2027-09-23	17.87	1.759	22.4	13.94	1.953	6.888	4.492	8.692	7.156
2027-09-24	17.13	1.706	25.25	15.38	1.882	6.634	5.213	8.297	6.473
2027-09-25	17.07	1.798	26.61	17.91	1.809	6.281	5.254	7.773	6.904
2027-09-26	16.83	1.813	26.35	18.23	1.768	5.928	5.098	7.489	6.736
2027-09-27	26.59	1.815	25.04	17.36	1.752	5.527	4.74	7.428	6.092
2027-09-28	34.23	1.864	22.92	15.83	1.732	5.141	4.338	7.544	5.578
2027-09-29	37.57	1.91	20.62	14.18	1.697	4.782	3.984	7.63	5.222
2027-09-30	39.84	1.906	18.37	12.38	1.722	4.446	3.69	7.691	5.06
2027-10-01	40.76	1.86	16.37	10.82	1.756	4.188	3.3	7.702	5.01
2027-10-02	41.31	1.777	14.75	9.436	1.769	4.045	2.986	7.7	4.973
2027-10-03	38.94	1.64	13.37	8.385	1.875	3.899	2.853	7.631	4.924
2027-10-04	35.03	1.513	12.33	7.531	1.943	3.789	2.813	7.607	4.699
2027-10-05	33.21	1.478	11.4	6.839	2.008	3.701	2.571	7.428	4.419
2027-10-06	30.18	1.579	10.61	6.289	2.042	3.609	2.427	7.162	4.168
2027-10-07	28.35	1.658	9.987	5.894	2.047	3.501	2.412	7.01	3.974
2027-10-08	25.85	1.716	9.491	5.674	2.023	3.383	2.367	7.022	3.954
2027-10-09	23.43	1.773	9.02	5.472	1.966	3.27	2.319	6.959	3.941
2027-10-10	22.59	1.812	8.596	5.343	1.891	3.162	2.288	6.822	3.887
2027-10-11	21.5	1.833	8.225	5.263	1.785	3.047	2.178	6.65	3.774
2027-10-12	20.38	1.83	7.887	5.193	1.733	2.911	2.088	6.516	3.674
2027-10-13	19.56	1.809	7.573	5.12	2.041	2.65	2.029	6.431	3.576
2027-10-14	18.95	1.761	7.293	5.005	2.17	2.577	2.063	6.408	3.495
2027-10-15	19.8	1.712	7.018	5.275	2.152	2.439	2.06	6.398	3.498
2027-10-16	24.26	1.77	6.784	5.181	2.172	2.428	2.068	6.384	3.5
2027-10-17	25.73	1.831	6.534	4.928	2.197	2.452	1.884	6.268	3.393
2027-10-18	25.74	1.896	6.297	4.729	2.296	2.416	1.815	6.175	3.366
2027-10-19	25.75	1.921	6.161	5.105	2.312	2.248	1.677	6.031	3.352
2027-10-20	25.53	1.897	5.946	5.201	2.316	2.276	1.606	6.028	3.364
2027-10-21	24.83	1.841	5.712	5.074	2.691	2.298	1.538	6.05	3.404
2027-10-22	23.6	1.787	5.502	4.958	2.936	2.315	1.549	6.084	3.446
2027-10-23	22.13	1.704	5.306	4.975	3.042	2.322	1.567	6.108	3.482
2027-10-24	20.69	1.648	5.1	5.294	3.09	2.339	1.609	6.104	3.487
2027-10-25	19.35	1.611	4.894	5.381	3.087	2.638	1.788	6.022	3.451
2027-10-26	18.25	1.557	4.679	5.734	3.048	2.94	2.175	6.034	3.274
2027-10-27	17.56	1.554	4.538	5.829	2.936	3.184	2.707	5.971	3.205
2027-10-28	17.07	1.572	4.341	5.959	2.808	3.356	3.207	5.953	3.166
2027-10-29	17.73	1.613	4.222	6.008	2.673	3.35	3.515	6.602	3.201
2027-10-30	17.69	1.654	4.162	6.046	2.544	3.256	3.576	6.976	3.238
2027-10-31	17.28	1.708	4.08	5.989	2.827	3.1	3.44	7.206	3.279
2027-11-01	16.96	1.763	3.958	6.887	3.03	2.951	3.21	7.629	3.323
2027-11-02	16.71	1.801	3.901	7.535	3.052	2.867	2.949	7.777	3.367
2027-11-03	16.4	1.816	3.878	7.389	3.002	3.298	2.727	7.625	3.357
2027-11-04	16.02	1.806	3.829	7.165	2.898	3.874	2.563	7.381	3.315
2027-11-05	21.7	1.783	3.721	7.063	2.746	4.441	2.614	7.094	3.251
2027-11-06	30.3	1.753	3.647	6.976	2.58	5.281	2.715	6.809	3.167
2027-11-07	33.19	1.731	3.545	6.809	2.415	5.623	3.061	6.566	2.987
2027-11-08	34.24	1.704	3.574	8.288	2.257	5.644	3.361	6.321	2.857
2027-11-09	36.54	1.695	3.619	8.567	2.122	5.942	3.556	6.119	2.783
2027-11-10	39.13	1.671	3.659	8.125	2.488	6.606	3.642	5.924	2.744
2027-11-11	41.28	1.64	3.673	8.137	2.789	7.342	3.587	5.732	2.715
2027-11-12	44.74	1.635	3.693	8.079	3.227	8.107	3.45	6.168	2.594
2027-11-13	46.3	1.649	3.677	7.928	3.926	8.76	3.703	7.641	2.553
2027-11-14	45.85	1.66	4.545	8.027	4.219	9.863	4.17	8.382	2.513
2027-11-15	44.23	1.665	5.816	9.222	4.106	10.7	4.807	10.07	2.529
2027-11-16	42.42	1.675	6.609	9.494	3.85	10.78	5.732	11.61	2.585
2027-11-17	41.58	1.684	6.848	9.292	3.55	10.24	6.582	12.82	2.638
2027-11-18	41.15	1.699	6.887	9.093	3.235	9.583	8.102	13.27	2.701
2027-11-19	40.09	1.721	6.842	8.865	2.962	8.896	9.782	13.21	2.883
2027-11-20	39.11	1.751	6.704	8.594	2.724	8.249	10.32	12.95	3.004
2027-11-21	40.25	2.07	6.465	8.255	2.52	8.148	11.64	12.41	3.106
2027-11-22	40.42	2.195	6.164	7.889	2.355	10.81	12.21	11.89	3.476
2027-11-23	39.8	2.174	5.832	7.542	2.213	17.88	12.24	11.29	3.656
2027-11-24	39.17	2.616	5.575	7.237	2.104	23.95	12.19	10.78	3.679
2027-11-25	40.48	3.26	5.383	6.976	2.445	28.02	11.89	10.35	3.651
2027-11-26	40.77	3.415	5.243	6.772	3.013	30.79	11.28	10.27	3.563
2027-11-27	40.24	3.295	5.093	6.606	3.335	36.55	10.39	10.07	3.439
2027-11-28	39.68	3.152	4.999	6.468	3.483	40.83	9.428	9.815	3.304
2027-11-29	39.2	3	4.937	6.357	3.563	43.26	8.462	9.589	3.129
2027-11-30	38.7	2.832	4.885	6.259	3.526	44.45	7.562	9.338	2.948
2027-12-01	38.08	2.655	4.845	6.181	3.379	44.14	10.99	9.053	2.791
2027-12-02	37.38	2.481	4.807	6.119	3.175	42.19	12.29	8.763	2.662
2027-12-03	36.62	3.935	4.766	6.05	2.957	39.05	12.16	8.478	2.558
2027-12-04	35.87	5.792	4.711	6.038	2.75	35.4	11.98	8.212	2.397
2027-12-05	35.25	8.037	4.642	6.07	2.566	32.71	11.65	7.966	2.314
2027-12-06	37.11	10.2	4.538	7.339	2.41	30.12	11	7.753	2.28
2027-12-07	38.39	10.89	4.717	9.808	2.309	27.66	10.07	7.582	2.248
2027-12-08	40.06	10.63	11.74	21.71	2.335	25.62	9.024	7.432	2.209
2027-12-09	41.83	9.721	16.29	29.1	2.596	23.99	7.997	7.34	2.175
2027-12-10	42.51	8.605	18.18	33.32	2.812	24.4	7.953	7.884	2.124
2027-12-11	43.57	8.864	19.18	37.01	2.959	24.77	7.774	8.857	2.114
2027-12-12	43.87	8.554	19.1	38.92	3.089	25	7.576	9.911	2.093
2027-12-13	43.81	9.355	18.22	39.95	3.115	25.22	7.554	12.72	2.076
2027-12-14	44.89	10.62	16.74	38.2	3.067	25.21	7.522	16.02	2.364
2027-12-15	45.48	10.57	15.64	43.9	2.962	24.95	7.315	17.96	2.5
2027-12-16	46.27	9.807	16.54	44.93	2.878	24.32	6.901	18.99	2.481
2027-12-17	47.55	9.925	16.41	43	2.767	23.87	6.376	19.56	2.421
2027-12-18	48.11	10.09	15.73	41.5	2.646	23.33	5.829	19.59	2.346
2027-12-19	48.14	12.06	15.29	41.3	2.536	22.73	5.328	19.15	2.249
2027-12-20	47.9	14.16	16.85	40.44	2.429	22.12	4.91	18.35	2.149
2027-12-21	47.41	15.88	17.08	39.68	2.338	21.44	4.571	17.4	2.029
2027-12-22	46.74	16.5	16.34	38.15	2.249	20.7	4.298	16.37	1.928
2027-12-23	45.92	16.04	15.58	36.42	2.179	19.98	4.072	15.42	2.389
2027-12-24	45.01	14.94	14.81	34.83	3.454	19.3	3.869	14.66	2.793
2027-12-25	44.09	13.54	13.95	33.37	4.184	18.69	3.69	14.05	3.098
2027-12-26	43.19	12.01	13.04	31.93	4.567	18.15	3.521	13.55	3.2
2027-12-27	42.33	10.52	12.07	30.47	8.046	17.67	3.371	13.12	3.06
2027-12-28	41.53	9.189	12.44	38.6	10.03	17.22	3.248	12.74	2.773
2027-12-29	40.76	8.037	12.38	48.12	10.89	16.82	3.139	12.4	2.466
2027-12-30	40.05	7.072	15.1	52.98	11.37	16.43	3.042	12.15	2.217
2027-12-31	39.38	6.287	15.88	56.24	15.95	16.07	2.945	11.91	2.046
2028-01-01	38.74	5.658	15.27	57.79	22.17	15.72	2.853	11.68	1.923
2028-01-02	38.13	5.153	14.3	57.32	24.6	15.37	2.769	11.46	1.825
2028-01-03	39.86	4.751	13.34	55.63	25.24	15.03	2.692	11.23	1.72
2028-01-04	42.31	4.992	12.52	54.02	25.34	19.51	2.613	11.04	1.659
2028-01-05	44.44	8.377	12.28	51.15	24.71	23.17	2.524	10.87	1.637
2028-01-06	46.73	9.941	12.45	48	23.17	25.88	2.449	10.71	1.612
2028-01-07	48.44	9.911	14.01	52.05	21	28.53	2.377	10.56	1.604
2028-01-08	48.76	9.453	14.78	52.86	18.71	33.02	2.315	10.4	1.611
2028-01-09	47.58	8.681	15.05	51.42	16.57	34.97	2.247	10.24	1.616
2028-01-10	45.4	7.669	15.38	50.48	14.75	34.39	2.185	10.06	1.613
2028-01-11	42.85	6.641	15.61	49.85	13.18	32.7	2.121	9.865	1.541
2028-01-12	40.42	5.745	15.56	48.86	11.93	30.56	2.064	9.676	1.474
2028-01-13	38.29	5.037	15.18	47.25	10.92	28.22	2.038	9.501	1.444
2028-01-14	36.46	4.486	14.56	45.24	10.58	25.87	2.053	9.319	1.399
2028-01-15	34.97	4.061	13.87	43.15	11.14	26.2	2.155	9.157	1.366
2028-01-16	33.69	3.734	13.21	41.51	11.11	36.21	2.294	9.009	1.356
2028-01-17	32.59	3.473	12.64	40.09	10.75	53.16	2.375	8.858	1.333
2028-01-18	31.65	3.252	12.14	38.88	10.37	66.92	2.357	8.722	1.322
2028-01-19	30.78	3.063	11.72	37.84	10.02	80.34	2.262	8.57	1.313
2028-01-20	30.01	2.913	11.36	36.87	9.601	87.74	2.127	8.421	1.271
2028-01-21	29.26	2.786	11.08	35.86	9.161	89.15	1.977	8.278	1.272
2028-01-22	28.53	2.655	10.84	34.85	8.752	86.66	1.836	8.14	1.281
2028-01-23	27.87	2.535	10.61	33.89	8.402	81.57	1.663	8.01	1.276
2028-01-24	27.12	2.541	10.4	33.01	8.054	75.05	1.513	7.867	1.248
2028-01-25	26.51	2.795	10.21	32.22	7.744	68.25	1.404	7.735	1.222
2028-01-26	26.43	3.212	10.03	31.47	7.47	63.32	1.376	7.607	1.198
2028-01-27	26.21	6.16	9.863	30.78	7.231	58.5	1.381	7.47	1.2
2028-01-28	26.09	8.716	9.702	30.15	7.015	54.09	1.318	7.342	1.166
2028-01-29	30.94	11.72	9.542	29.49	6.826	50.43	1.771	7.208	1.168
2028-01-30	42.79	15.76	9.379	28.88	6.642	47.38	3.499	7.073	1.168
2028-01-31	50.6	17.64	9.212	28.26	6.484	44.82	6.446	6.947	1.162
2028-02-01	56.68	18.53	11.18	29.63	6.393	42.56	9.28	6.814	1.144
2028-02-02	60.02	18.72	14.77	30.86	6.396	40.6	10.88	6.682	1.076
2028-02-03	60.25	18.22	18.97	30.37	6.491	38.89	10.9	6.556	1.017
2028-02-04	57.45	17.33	24.56	29.81	6.664	37.42	9.784	6.457	1.003
2028-02-05	52.48	16.08	30.82	29.99	6.788	36.15	8.218	6.319	1.01
2028-02-06	53.16	20.38	35.16	30.28	6.773	34.97	6.694	6.184	1.01
2028-02-07	53.01	21.13	36.13	30.15	6.625	33.91	11.11	6.051	1.015
2028-02-08	52.97	19.25	34.21	29.36	6.418	32.97	25.98	5.907	1.02
2028-02-09	54.2	17.38	30.97	28.37	9.66	32.1	56.81	5.744	1.003
2028-02-10	56.57	15.99	27.55	27.26	11.27	31.31	80.26	5.639	0.9459
2028-02-11	59.93	14.81	24.46	26.25	11.43	30.46	92.52	5.521	0.8814
2028-02-12	67.01	14.02	21.81	25.32	11.37	29.64	98.72	5.4	0.9003
2028-02-13	70.35	13.39	19.57	24.54	11.13	28.95	99.3	5.331	1.012
2028-02-14	70.51	12.67	17.74	23.82	10.51	28.26	92.45	5.234	1.172
2028-02-15	69.76	11.98	16.22	23.16	9.59	27.59	82.35	5.106	1.3
2028-02-16	68.39	11.33	14.93	22.51	8.544	26.81	72.48	5.032	1.313
2028-02-17	66.4	10.82	13.85	21.87	7.569	26.19	63.75	4.965	1.244
2028-02-18	64.02	10.79	12.91	21.24	6.763	25.58	55.91	4.868	1.133
2028-02-19	61.49	10.56	12.13	20.67	6.13	24.91	48.73	4.846	1.047
2028-02-20	59.17	10.2	11.45	20.15	5.635	24.32	42.21	4.763	0.973
2028-02-21	56.96	9.874	10.84	19.66	5.255	23.76	36.48	4.64	0.9115
2028-02-22	54.75	9.559	10.26	19.19	4.958	23.18	31.67	4.558	3.346
2028-02-23	52.66	9.222	9.741	18.66	4.699	22.54	27.71	4.556	3.572
2028-02-24	50.78	8.879	9.276	18.18	4.486	21.98	24.49	4.545	2.368
2028-02-25	49.32	8.593	8.866	17.7	4.267	21.45	21.87	4.384	1.586
2028-02-26	47.98	8.315	8.501	17.22	5.96	20.98	19.79	4.259	1.306
2028-02-27	46.86	8.067	8.13	26.22	20.22	20.52	18.02	4.111	1.185
2028-02-28	45.89	7.838	7.822	31.16	36.25	20.09	16.59	4.108	1.747
2028-02-29	44.81	7.648	7.555	33.12	39.42	19.67	15.43	9.847	1.687
2028-03-01	43.8	7.473	7.367	34.79	43.52	19.07	14.71	25.43	1.575
2028-03-02	42.81	7.299	9.07	61.36	47.34	19.12	14.15	48.91	1.786
2028-03-03	41.84	7.127	10.49	75.13	46.12	20.52	13.71	71.57	2.083
2028-03-04	40.96	6.941	11.58	77.71	42.87	23.65	13.51	94.12	2.271
2028-03-05	41.84	6.792	12.57	77.21	40.18	28.02	13.42	111.8	2.279
2028-03-06	42.95	6.896	12.92	73.35	38.03	31.97	13.35	118.3	2.14
2028-03-07	44.79	6.88	12.3	66.01	36.31	53.61	13.16	113.1	1.915
2028-03-08	47.82	6.885	11.41	80.54	34.49	64.89	12.75	100.6	1.676
2028-03-09	49.24	6.933	14.75	92.51	32.58	68.32	12.18	85.85	1.458
2028-03-10	49.41	8.28	24.28	92.82	30.7	70.87	11.61	72.08	1.287
2028-03-11	48.98	9.13	38.39	89.93	28.59	72.29	10.98	60.5	1.141
2028-03-12	49.25	9.481	56.99	87.16	26.43	71.11	10.36	51.07	1.013
2028-03-13	49.27	9.69	74.58	83.99	24.74	67.23	9.777	43.52	0.9026
2028-03-14	48.34	9.739	87.77	79.66	23.25	64.98	9.251	37.46	0.7545
2028-03-15	47.01	9.564	101.7	75.87	24.76	73.1	8.781	32.68	0.7263
2028-03-16	45.73	9.244	115.4	72.18	25.43	93.53	8.35	29.2	0.7443
2028-03-17	44.41	8.836	122.6	68.55	24.83	115.5	7.968	29.95	0.7464
2028-03-18	43.14	8.436	120.3	65.14	24.23	135.4	7.618	38.18	0.7426
2028-03-19	42.09	8.055	109.9	61.66	23.84	147.9	7.312	61.45	0.8801
2028-03-20	41.13	7.995	97.77	58.18	25	146.8	7.047	95.19	3.96
2028-03-21	40.43	8.75	85.58	54.64	24.89	135.1	6.767	125.5	12.61
2028-03-22	39.6	8.464	74.88	51.1	23.82	120.3	6.547	139.5	41.99
2028-03-23	38.67	7.684	66.13	47.79	22.59	107.6	6.383	141.3	70.56
2028-03-24	37.54	7.069	58.6	47.68	21.55	98.51	6.265	135.4	97.5
2028-03-25	36.71	6.732	52.71	46.15	20.57	91.88	6.16	126.8	121.9
2028-03-26	36.1	6.496	48.82	44.46	22.49	86.62	6.026	125.5	136.6
2028-03-27	38.21	6.536	46.82	42.95	22.8	81.69	5.784	117.4	139.5
2028-03-28	46.13	6.628	47.06	42.05	22.24	77.49	5.502	106	132.9
2028-03-29	47.69	6.777	48.84	41.24	21.83	72.4	5.355	96.98	120.4
2028-03-30	46.57	6.848	50.85	40.41	21.69	66.84	18.36	93.42	105.8
2028-03-31	46.19	6.822	51.93	40.51	21.2	62.17	27.85	89.65	91.69
2028-04-01	46.25	6.703	52.66	40.23	20.58	58.48	36.51	84.58	78.95
2028-04-02	46.26	6.579	53.28	39.61	19.95	55.22	40.38	79.52	67.78
2028-04-03	45.58	6.392	81.4	39.02	18.97	52.19	39.97	75.1	58.44
2028-04-04	44.26	6.16	85.68	38.81	18.11	49.69	38.5	71.18	50.81
2028-04-05	42.77	5.875	75.66	39.19	17.29	47.36	39.12	67.7	44.57
2028-04-06	42.57	5.625	67.95	39.55	16.88	45.34	42.4	64.39	39.26
2028-04-07	41.6	5.413	63.54	39.76	16.6	43.36	47.49	61.5	34.89
2028-04-08	41.14	7.582	60.78	39.82	16.07	41.66	52.92	58.88	31.33
2028-04-09	40.51	10.2	58.08	39.05	15.62	40.11	55.16	56.4	28.31
2028-04-10	39.79	12.56	55.44	37.64	15.13	39.16	54.75	54.16	25.59
2028-04-11	39.25	14.28	53.42	37.39	14.51	37.9	53.09	52.51	23.47
2028-04-12	38.77	14.64	52.39	36.38	14.04	36.65	50.59	50.89	21.53
2028-04-13	37.92	13.87	50.85	35.1	13.74	35.39	47.73	49.3	19.78
2028-04-14	36.93	12.5	49.87	33.94	13.36	34.05	44.74	47.4	18.32
2028-04-15	36.56	11.5	48.89	33.09	12.99	32.77	41.83	45.97	16.98
2028-04-16	35.78	10.74	48.17	32.18	12.7	31.66	38.9	44.99	15.89
2028-04-17	34.94	10.38	47.92	31.1	15.24	30.56	36.14	43.79	14.95
2028-04-18	34.16	10.59	46.87	30.05	15.87	29.79	33.71	42.94	13.74
2028-04-19	33.59	10.81	45.35	28.91	15.65	29.1	31.48	42.14	13.13
2028-04-20	33.16	11.14	43.72	28.09	15.43	28.57	29.38	41.17	12.47
2028-04-21	32.55	10.95	42.13	27.13	15.07	27.43	27.46	40.06	12
2028-04-22	32.33	10.96	40.72	26.14	14.41	26.51	25.54	38.94	11.56
2028-04-23	31.75	10.69	39.4	25.56	13.73	26.75	24.08	38.44	11.22
2028-04-24	31.07	10.3	38.14	24.89	13.09	27.45	22.84	37.74	11.05
2028-04-25	30.17	9.91	37.86	24.16	12.57	29.6	21.51	37.09	11.11
2028-04-26	29.85	9.57	38.26	23.86	12.01	30.88	20.55	38.75	11.25
2028-04-27	30.15	9.329	39.13	23.04	11.73	32.4	19.91	39.36	11.74
2028-04-28	29.98	9.044	41.31	22.24	11.32	34.2	19.24	39.95	11.87
2028-04-29	29.67	9.176	45.32	21.6	10.8	35.29	18.64	40.19	11.85
2028-04-30	29.69	15.2	49.08	20.94	10.17	36.07	18	39.77	11.96
2028-05-01	29.69	24.11	51.06	20.33	9.577	35.89	17.67	38.89	11.83
2028-05-02	29.28	29.34	51.96	19.47	9.109	35.02	17.07	37.92	11.29
2028-05-03	28.22	32.96	50.18	18.45	8.854	33.49	16.21	36.53	11
2028-05-04	27.02	35.5	47.93	17.57	8.428	32.06	15.83	34.96	10.71
2028-05-05	26.03	36.99	45.71	16.71	8.888	30.76	15.16	33.65	10.26
2028-05-06	25.05	37.24	43.65	16.39	8.802	29.74	14.63	33.5	9.717
2028-05-07	24.39	35.85	41.59	16.32	8.252	28.97	14.07	33.06	9.29
2028-05-08	24.06	33.63	40.11	16.25	7.815	27.88	13.48	32.77	9.539
2028-05-09	23.76	30.95	38.75	16.05	7.414	27.25	12.88	32.74	9.887
2028-05-10	23.25	27.94	37.26	15.86	6.834	27.91	12.37	32.41	10.28
2028-05-11	22.85	24.92	35.68	15.52	6.22	28.2	11.84	31.42	10.59
2028-05-12	22.21	22.69	34.06	15.18	5.716	28.13	11.43	30.07	10.73
2028-05-13	21.63	20.79	33.5	14.99	5.47	27.78	11.31	28.73	10.63
2028-05-14	21	19.09	32.52	14.8	5.457	27.42	10.93	27.65	10.32
2028-05-15	20.59	17.94	31.27	14.57	5.662	26.99	10.43	27.13	9.913
2028-05-16	20.16	17.31	30.04	14.11	5.91	25.94	9.976	27.26	9.485
2028-05-17	19.62	16.46	29.34	13.65	6.02	24.64	9.489	26.82	9.015
2028-05-18	19.12	15.49	28.79	13.66	6.056	23.63	9.079	25.95	8.517
2028-05-19	18.98	14.77	28.29	13.6	5.978	23.16	8.748	27.83	8.012
2028-05-20	18.88	14.19	27.18	13.44	5.775	22.55	8.311	39.48	7.626
2028-05-21	18.35	13.61	26.41	13.23	5.329	22.17	7.99	39.75	7.115
2028-05-22	17.7	12.95	25.71	12.83	4.837	23.2	7.746	34.83	6.662
2028-05-23	16.93	12.35	24.54	12.19	4.661	24.41	7.73	31.81	6.18
2028-05-24	16.34	11.94	23.34	11.67	4.562	24.43	7.552	39.7	6.061
2028-05-25	16.36	11.44	22.17	11.41	4.385	24.25	7.19	41.73	7.273
2028-05-26	16.05	11.14	21.13	11.08	3.888	24.04	6.87	38.95	7.729
2028-05-27	15.41	10.85	20.3	10.42	3.809	23.7	6.755	36.54	7.671
2028-05-28	15.58	10.75	19.78	9.816	3.759	23.34	6.87	34.86	7.52
2028-05-29	15.2	10.85	19.6	9.403	3.631	22.44	6.676	33.24	7.337
2028-05-30	14.9	10.62	19.12	9.709	3.24	21.65	6.668	31.38	7.012
2028-05-31	14.71	10.13	18.77	9.677	3.45	20.9	6.494	29.52	6.518
2028-06-01	14.6	9.975	18.54	9.559	3.516	19.54	6.147	28.01	6.018
2028-06-02	14.45	9.816	18.35	9.406	3.415	21.78	5.961	27.24	5.528
2028-06-03	13.9	9.759	17.76	9.144	4.293	23.91	5.799	26.39	5.061
2028-06-04	18.64	9.592	16.99	9.913	4.857	25.02	5.699	25.62	5.465
2028-06-05	22.1	9.333	16.35	9.967	4.977	25.62	5.52	24.54	5.715
2028-06-06	24.46	9.005	16.14	9.686	9.344	26.21	5.396	39.71	5.824
2028-06-07	25.54	8.605	15.76	9.389	11.84	26.41	5.257	44.64	5.947
2028-06-08	25.14	8.114	15.91	9.008	12.75	26.08	5.012	42.15	5.987
2028-06-09	24.03	7.79	15.71	8.664	14.56	26.27	4.635	39.31	5.802
2028-06-10	21.84	7.63	15.13	8.393	15.62	25.71	4.31	37.19	5.439
2028-06-11	19.45	7.664	14.51	7.808	15.54	26.03	4.434	35.16	5.195
2028-06-12	17.65	7.749	14.2	7.158	14.73	25.25	4.611	33.85	4.948
2028-06-13	16.72	7.815	14.42	6.737	13.53	24.61	4.666	32.61	4.651
2028-06-14	15.8	8.24	14.09	6.592	12.18	24.24	4.914	31.4	4.46
2028-06-15	15.13	8.56	13.84	6.666	11.06	23.94	5.722	30.5	4.305
2028-06-16	14.58	8.648	13.55	6.649	9.906	23.68	6.515	30.66	4.289
2028-06-17	14.15	8.617	13.4	6.519	10.29	23.43	6.886	30.67	4.212
2028-06-18	13.36	10.18	12.63	6.227	11.22	23.3	6.65	30.57	4.09
2028-06-19	12.59	12.32	12.05	5.809	11.1	22.52	6.134	30.58	3.896
2028-06-20	12.39	13.61	13.3	5.64	10.34	21.59	5.51	31.01	3.839
2028-06-21	12.27	14.08	14.05	5.672	9.401	21.27	4.763	30.93	3.809
[truncated: 8,228 more rows]
