# Supplementary material for: Modelling of climate change impact on flow conditions in the lowland anastomosing river
Source: PeerJ. 2020 Jun 23;8:e9275. doi: 10.7717/peerj.9275 (PMC7319031; doi:10.7717/peerj.9275)
Supplement: Supplemental Information 3 — Q_model 1–9 refers to Regional Climate Model ensemble used in the study. [file peerj-08-9275-s003.xlsx]

## Sheet: 2073-2100
Date	Q_model1	Q_model2	Q_model3	Q_model4	Q_model5	Q_model6	Q_model7	Q_model8	Q_model9
2073-01-01	13.57	22.42	21.97	46.51	18.35	51.16	30.64	2.029	5.331
2073-01-02	18.36	28.07	20.89	45.61	18.11	50.56	32.52	1.989	5.235
2073-01-03	30.65	34.88	19.59	44.83	16.95	48.99	33.57	1.951	5.14
2073-01-04	37.23	37.22	18.42	44.19	15.29	46.85	34.35	1.912	5.041
2073-01-05	38.41	42.81	17.47	43.68	13.96	44.57	34.35	1.878	4.929
2073-01-06	37.82	46.24	16.65	46.8	12.83	42.57	33.87	1.844	4.829
2073-01-07	36.56	48.53	16.03	51.74	12.24	41.15	33.09	1.8	4.739
2073-01-08	34.62	50.51	16.86	76.42	12.18	40.31	32.2	1.759	4.646
2073-01-09	32.08	51.05	19.78	101.4	12.26	39.72	31.27	1.717	4.546
2073-01-10	29.25	49.48	34.19	105.1	28.46	38.98	30.39	1.685	4.456
2073-01-11	26.56	46.22	44.45	101.2	39.71	38.05	29.57	4.454	4.379
2073-01-12	24.12	42.16	48.98	97.6	51.05	37.03	28.79	5.063	4.298
2073-01-13	22.08	38.06	61.7	95.15	65.89	35.98	28.06	5.694	4.222
2073-01-14	20.47	34.43	65.96	91.49	70.39	34.98	28.55	6.887	4.138
2073-01-15	19.25	31.4	63.1	86.74	70.27	34.06	28.58	7.525	4.061
2073-01-16	18.24	28.91	58.53	81.8	67.18	33.53	28.16	7.261	3.988
2073-01-17	17.36	26.88	53.88	77.38	62.88	49.57	27.77	6.387	3.919
2073-01-18	16.6	25.21	49.48	73.4	58.32	64.14	27.39	5.335	4.855
2073-01-19	15.85	23.8	45.42	70.1	53.84	70.46	26.96	4.379	6.304
2073-01-20	15.22	22.61	44.29	67.23	50.67	71.78	26.48	3.627	7.893
2073-01-21	14.66	21.6	43.8	64.56	47.24	77.93	25.91	3.066	9.317
2073-01-22	14.15	20.7	41.47	62.11	44.08	79.58	27.58	2.678	9.957
2073-01-23	13.73	19.91	38.37	60.14	41.52	77.93	28.81	2.358	9.723
2073-01-24	13.38	19.17	35.87	58.4	39.34	75.49	29.83	2.118	8.902
2073-01-25	13.05	18.54	34.15	56.88	37.19	72.61	42.81	1.946	7.826
2073-01-26	12.73	17.96	32.94	55.45	35.01	69.11	49.91	1.805	6.766
2073-01-27	12.39	17.4	31.94	54.05	32.9	65.13	52.25	1.686	5.865
2073-01-28	12.01	16.82	31.09	52.7	31	61.07	55.45	1.586	5.157
2073-01-29	11.63	16.3	30.32	51.39	39.64	57.28	56.26	1.495	4.611
2073-01-30	11.32	15.81	29.71	50.15	43.33	53.92	54.83	1.409	4.193
2073-01-31	11.04	15.31	28.96	49.03	44.12	51.1	55.67	1.361	3.849
2073-02-01	10.76	14.92	29.66	47.98	45.44	48.75	53.74	1.327	3.529
2073-02-02	10.49	14.53	31.93	46.94	51.25	46.76	50.52	1.277	3.293
2073-02-03	10.23	14.13	34.16	46.12	59.7	45.17	47.67	1.235	3.124
2073-02-04	9.968	13.74	35.38	45.29	76.32	43.77	45.27	1.184	2.997
2073-02-05	9.735	13.39	36.57	44.87	87.55	42.58	43.05	1.15	2.902
2073-02-06	9.504	13.04	39.67	46.4	94.6	41.49	41.09	1.118	2.833
2073-02-07	9.292	12.66	42.06	46.48	100.3	40.51	39.34	1.065	2.758
2073-02-08	9.117	12.32	42.05	45.84	102.9	39.55	37.75	1.055	2.691
2073-02-09	9.029	12.03	41.27	45.44	100.9	38.62	36.4	1.029	2.597
2073-02-10	10.6	11.75	40.9	45.41	94.81	37.74	35.12	0.9986	2.495
2073-02-11	13.13	11.46	40.24	45.05	86.51	36.94	34	0.9602	3.333
2073-02-12	23.34	12.28	39.44	49.38	77.83	36.14	33.02	0.9217	15.76
2073-02-13	31.74	13.88	38.6	50.66	69.89	35.38	32.18	0.8634	27.49
2073-02-14	38.6	15.9	38.08	49.54	63.1	34.65	36.15	0.8252	35.09
2073-02-15	50.18	24.26	37.43	48.58	57.51	33.9	37.78	0.7923	40.6
2073-02-16	59.84	30.48	36.71	48.07	52.93	33.21	40.21	0.7757	42.95
2073-02-17	64.19	34.4	37.62	52.84	49.13	32.52	41.01	0.781	40.88
2073-02-18	64.52	37.18	37.91	57.3	45.97	31.77	40.63	1.736	35.37
2073-02-19	64.48	37.83	37.56	58.03	43.28	35.18	40.48	12.48	29.23
2073-02-20	61.06	35.7	37.12	58.06	41.01	36.15	40.6	25.33	23.15
2073-02-21	55.14	31.68	36.82	58.12	39.06	35.17	40.59	38.77	18.28
2073-02-22	48.97	27.07	36.69	57.73	37.38	34.24	40.59	47.78	14.9
2073-02-23	43.55	22.77	36.54	56.8	36.12	33.63	40.05	54.63	12.52
2073-02-24	38.77	19.24	36.34	55.43	34.89	32.89	39.34	58.91	10.67
2073-02-25	34.99	16.62	36.13	53.74	33.89	31.89	39.25	68.26	9.555
2073-02-26	31.72	14.59	35.91	52.13	33	30.72	38.74	79.16	15.66
2073-02-27	29.06	13.08	35.55	50.39	32.31	29.54	37.89	90.53	23.34
2073-02-28	27.05	11.95	38.68	50.04	31.89	28.37	37.62	99.75	30.83
2073-03-01	27.92	10.99	40.25	49.15	35.96	27.31	36.8	104.8	37.01
2073-03-02	43.45	19.3	40.34	47.91	39.62	26.6	35.8	104.7	40
2073-03-03	50.45	24.98	40.36	46.77	45.74	27.34	34.62	98.92	38.86
2073-03-04	49.28	29.52	40.46	45.82	60.71	27.03	38.03	89.58	34.54
2073-03-05	47.87	34.21	40.36	44.89	72.18	26.3	41.56	78.82	28.96
2073-03-06	51.11	38.84	39.87	43.79	80.79	25.96	42.68	68.76	23.63
2073-03-07	53.13	43.77	39.29	43.22	83.07	29.91	43.32	60.2	19.16
2073-03-08	53.24	49.34	38.57	42.39	82.98	31.87	43.76	53.13	21.1
2073-03-09	52.76	55.96	39.54	43.98	83.18	31.85	43.38	47.09	31.37
2073-03-10	51.4	62.24	38.8	48.72	86.86	32.65	42.84	41.86	45.41
2073-03-11	49.53	67.14	37.5	54.39	85.58	35.91	42.07	39.91	66.01
2073-03-12	47.79	69.37	36.36	55.17	80.96	37.26	41.26	41.46	79.96
2073-03-13	46.22	68.3	35.38	54.48	78.62	37.21	40.59	40.71	88.41
2073-03-14	44.56	63.74	34.59	54.28	74.7	37.19	39.96	45.49	90.83
2073-03-15	43.07	56.99	33.76	54.03	69.92	37.34	39.08	74.09	103.4
2073-03-16	41.41	49.6	33.06	53.24	65.48	37.4	38.05	89.57	102.7
2073-03-17	39.83	42.77	32.28	51.92	63.19	37.26	36.78	102.3	97.75
2073-03-18	38.28	36.93	31.54	50.24	60.14	36.82	40.03	122	112.9
2073-03-19	36.8	32.81	30.86	48.43	56.63	36.08	40.6	127.4	123.9
2073-03-20	35.47	30.3	30.24	46.52	53.29	35.1	39.6	127	128.6
2073-03-21	34.28	28.38	29.61	44.96	50.58	34.09	40.05	125.6	131.4
2073-03-22	33.23	26.94	28.99	43.73	48.1	33.33	40.03	124.1	131.5
2073-03-23	32.36	25.83	28.39	42.48	45.65	32.44	39.82	130.5	128.3
2073-03-24	31.54	24.78	27.79	41.25	43.34	31.66	39.3	130.7	129.8
2073-03-25	30.74	23.71	27.27	44.37	41.52	30.88	38.48	126.6	123
2073-03-26	30.6	22.57	31.26	44.09	40.07	30.23	37.75	120.7	109.9
2073-03-27	30.98	21.38	34.76	44.47	38.84	29.55	36.54	126.8	99.7
2073-03-28	30.47	20.14	37.44	43.9	37.56	29.84	40.75	124.5	90.92
2073-03-29	29.89	19.16	39.43	43.04	36.19	29.55	41.27	116.6	87.36
2073-03-30	29.66	19.52	41.97	42.25	35.26	29.58	39.06	117.3	82.95
2073-03-31	30.03	19.8	44.43	41.31	34.36	29.65	37.19	114.5	88.88
2073-04-01	29.95	19.83	46	40.2	33.6	29.9	38.8	108.6	87.65
2073-04-02	29.39	21.78	46.25	38.84	34.23	33.83	38.51	103.1	83.09
2073-04-03	28.52	22.93	45.3	37.48	34.89	36.23	37.8	98.38	78.29
2073-04-04	27.3	22.07	43.64	36.27	34.22	37.04	37.26	95.96	74.53
2073-04-05	25.95	20.81	43.39	35.25	33.55	37.78	37.15	95.94	73.29
2073-04-06	24.71	21.07	41.93	34.13	33.58	38.45	36.81	92.56	71.09
2073-04-07	23.57	23.14	39.86	33.04	33.35	38.75	35.81	87.9	67.48
2073-04-08	22.65	26.43	38.16	31.97	32.82	38.92	35.44	83.45	63.82
2073-04-09	23.27	29.35	36.77	30.99	33.28	38.38	35.22	79.9	60.33
2073-04-10	23.62	31.55	35.97	30.09	42.19	38.31	34.44	76.63	57.25
2073-04-11	23.16	32.51	34.49	29.69	44.42	38.7	33.39	86.37	54.69
2073-04-12	22.26	32.39	33.23	29.31	43.66	39.45	32.08	88.01	52.23
2073-04-13	21.19	31.47	32.14	28.54	44.8	40.61	32.45	83.2	49.9
2073-04-14	20.16	30.11	30.97	27.85	45.41	40.8	32.25	80.07	48
2073-04-15	19.23	28.72	29.99	27.33	44.98	41.15	31.59	77.27	45.6
2073-04-16	18.4	27.33	29.06	27.26	43.46	41.54	32.17	74.19	43.48
2073-04-17	17.56	26.01	28.19	27.74	42.24	41.49	31.62	71.21	41.95
2073-04-18	17.01	24.77	27.64	28.53	40.14	41.24	30.5	68.3	40.52
2073-04-19	16.45	23.82	26.69	29.32	51.56	41.02	29.78	66.1	39.09
2073-04-20	16.01	23.05	25.77	29.55	53.61	40.13	29.2	63.71	37.99
2073-04-21	17.53	22.26	24.84	29.16	50.86	38.68	28.54	60.86	37.01
2073-04-22	18.6	21.39	24.08	28.72	49.7	37.11	27.49	58.86	35.88
2073-04-23	19.93	20.65	23.29	28.07	49.25	35.69	26.43	57.24	35.24
2073-04-24	21.1	20.19	22.49	27.11	47.96	34.05	25.55	55.81	34.5
2073-04-25	21.68	20.85	22.38	28.88	45.82	32.55	24.33	54.55	33.71
2073-04-26	21.64	20.21	21.67	28.25	43.01	30.81	23.53	53.22	32.92
2073-04-27	21.05	19.38	20.94	26.76	40.1	30.08	22.61	51.71	32.05
2073-04-28	21.59	19.62	20.64	25.73	38.36	29.32	21.39	50.21	31.07
2073-04-29	21.57	19.73	20.34	25.11	36.89	28.63	20.13	48.4	29.7
2073-04-30	22.89	19.67	19.66	24.38	35.38	27.65	19.25	46.41	28.18
2073-05-01	23.46	19.49	18.49	23.31	34.16	26.62	18.6	44.64	26.72
2073-05-02	23.57	18.86	17.4	22.1	33.08	25.48	18.26	42.93	25.97
2073-05-03	25.88	18.09	16.68	20.95	31.94	24.35	17.56	41.19	25.06
2073-05-04	27.2	17.64	16.42	19.81	29.58	23.77	17.3	39.5	23.88
2073-05-05	27.31	17.04	16.1	18.7	27.85	23.57	16.87	38.93	23.62
2073-05-06	27	16.53	15.58	17.71	26.43	22.8	16.39	38.21	23.08
2073-05-07	28.47	19.03	15.43	16.71	26.05	21.82	16.22	37.48	22.3
2073-05-08	28.53	20.24	14.97	18.13	25.91	21.28	15.98	36.72	21.89
2073-05-09	27.26	19.96	14.57	19.29	25.75	20.94	15.93	36.02	21.26
2073-05-10	26	20.02	14.63	19.51	24.47	19.79	15.82	35.21	21.03
2073-05-11	25.26	20.16	14.67	21.24	23.38	18.85	15.49	33.88	20.45
2073-05-12	24.29	20.17	14.49	21.5	23.58	18.24	15.01	32.36	19.48
2073-05-13	22.92	20.03	14.17	20.98	23.85	18.17	14	31.58	18.81
2073-05-14	21.84	19.34	13.6	20.14	23.44	18.09	13.32	30.02	18.15
2073-05-15	20.38	18.16	12.87	19.39	22.76	17.86	13.24	28.95	21.17
2073-05-16	22.69	17.07	12.07	18.25	22.05	18.29	12.88	28.55	21.34
2073-05-17	24.46	16.89	11.23	17.05	20.99	18.05	12.66	27.59	19.7
2073-05-18	23.83	16.36	11.32	17.92	19.78	17.72	12.55	26.07	17.63
2073-05-19	22.21	15.53	11.14	17.69	18.93	17.26	12.35	24.63	16.59
2073-05-20	20.31	15.1	10.84	16.64	18.39	16.57	11.84	23.47	15.74
2073-05-21	19.39	14.49	10.48	15.91	18.53	16.18	11.2	22.59	14.81
2073-05-22	21.62	38.31	10.12	14.85	18.45	15.67	11.14	21.91	14.08
2073-05-23	23.24	52.32	9.764	13.95	18.33	15.36	10.48	21.36	13.48
2073-05-24	23.64	46.74	9.327	13.33	19.45	14.53	10.28	20.73	13.03
2073-05-25	23.92	39.16	8.936	13.23	20.56	14.23	10.34	20.14	12.81
2073-05-26	23.79	33.43	8.74	12.75	21.09	13.89	10.29	19.6	12.53
2073-05-27	23.23	29.87	8.511	12.21	21.12	13.53	10.29	19.15	12.45
2073-05-28	22.16	26.92	8.4	12.09	20.45	12.86	10.24	19	12.04
2073-05-29	20.65	25.26	8.463	11.7	19.41	12.07	9.976	18.89	11.74
2073-05-30	19.12	23.33	8.417	11.25	18.71	11.35	9.357	18.76	11.6
2073-05-31	17.45	21.71	8.327	11.19	17.98	11.06	8.637	18.37	11.47
2073-06-01	16.69	20.68	8.12	10.92	17.23	11.11	8.309	17.69	11.23
2073-06-02	15.85	19.84	7.799	11.01	16.69	10.94	8.004	16.59	11.05
2073-06-03	15.09	18.92	7.473	11.1	16.4	10.6	7.879	16.22	11
2073-06-04	14.57	17.96	7.255	11.04	15.81	10.43	7.892	15.98	10.98
2073-06-05	14.15	17.13	7.458	11.01	15.52	10.12	8.019	15.96	10.84
2073-06-06	13.99	17.04	7.648	10.63	15.26	9.801	8.088	15.83	10.54
2073-06-07	13.76	17.04	7.794	9.913	14.5	9.848	8.051	15.21	10.32
2073-06-08	13.29	16.73	7.814	9.626	13.43	9.657	7.951	14.82	10.01
2073-06-09	12.89	16.43	7.71	9.44	12.87	9.597	7.506	15.02	9.758
2073-06-10	12.54	16.21	7.466	8.982	12.85	9.598	6.853	14.87	9.818
2073-06-11	12.25	15.77	6.898	8.416	13.59	9.759	6.077	14.74	9.752
2073-06-12	11.98	15.48	6.19	8.088	13.65	9.604	5.518	14.31	9.624
2073-06-13	11.65	15.15	5.403	7.775	12.82	9.462	5.29	13.8	9.531
2073-06-14	11.63	15.12	5.127	7.894	11.83	9.147	5.099	13.48	9.165
2073-06-15	16.23	15.2	5.3	7.962	11.08	8.631	5.401	12.93	8.699
2073-06-16	19.72	15.79	5.341	7.979	14.04	9.018	5.526	12.59	8.417
2073-06-17	21.35	16.71	5.327	7.955	18.05	9.131	6.459	11.9	8.147
2073-06-18	22.49	18.83	5.286	7.603	21.28	9.042	8.626	11.95	8.197
2073-06-19	21.7	21.05	5.267	7.518	24.98	8.826	12.19	11.81	8.195
2073-06-20	20.63	22.63	5.386	7.243	27.75	9.09	16.45	11.46	7.968
2073-06-21	22.62	23.24	5.337	7.135	29.48	9.037	19.75	11.17	8.864
2073-06-22	25.96	22.41	5.314	7.15	29.44	8.566	21.37	10.94	9.639
2073-06-23	25.9	21.35	5.2	7.164	29.67	8.033	20.55	10.71	10.16
2073-06-24	25.21	19.92	5.45	7.264	27.62	7.186	18.42	10.42	10.29
2073-06-25	24.51	18.3	5.67	7.334	24.74	6.531	16.3	9.966	10.48
2073-06-26	23.55	16.88	5.797	7.293	22.7	5.999	14.43	9.708	13.52
2073-06-27	23.13	16.19	5.742	7.172	20.65	6.145	12.58	9.717	15.44
2073-06-28	22.36	15.69	5.55	6.684	18.82	9.192	11.36	9.799	16.8
2073-06-29	20.73	16.63	5.154	5.932	17.51	9.561	11.1	9.641	17.18
2073-06-30	19.4	16.71	4.582	5.788	16.9	8.432	10.84	9.332	16.75
2073-07-01	17.99	16.29	4.217	5.751	16.58	7.282	10.53	8.68	15.97
2073-07-02	16.88	15.9	4.041	5.748	16.44	6.455	10.29	8.189	15.28
2073-07-03	16.23	15.44	3.979	5.703	16.33	5.913	10.08	8.035	14.19
2073-07-04	15.74	14.68	3.884	5.445	17.01	5.787	9.714	7.899	13.14
2073-07-05	15.24	13.78	3.849	5.499	16.84	5.833	9.257	7.748	12.01
2073-07-06	15.3	12.94	3.592	5.535	16.35	5.514	8.64	7.664	11.32
2073-07-07	14.98	11.91	3.54	5.529	16.16	4.699	9.256	7.427	10.63
2073-07-08	14.5	11.21	3.564	5.309	15.94	4.662	10.12	7.106	9.807
2073-07-09	14.07	11.25	3.729	8.277	15.22	4.645	10.49	6.786	9.044
2073-07-10	13.66	10.97	3.866	10.07	14.44	4.648	10.9	6.532	8.335
2073-07-11	13.11	10.44	12.55	10.29	13.98	4.426	10.79	6.689	8.027
2073-07-12	12.41	10.04	16.69	10.83	13.33	4.293	10.31	6.897	8.014
2073-07-13	11.6	9.814	14.84	10.69	12.3	3.78	9.201	7.026	7.9
2073-07-14	11.15	9.593	11.59	10.38	11.13	4.166	7.808	7.066	7.513
2073-07-15	10.85	9.243	8.941	18.5	11.09	4.45	6.126	6.805	6.909
2073-07-16	10.91	8.915	7.259	21.01	10.34	4.448	4.849	6.436	6.605
2073-07-17	10.88	8.642	6.084	17.76	10.04	4.466	4.415	6.223	6.354
2073-07-18	10.66	8.458	5.221	14.63	9.905	4.4	4.409	5.964	6.072
2073-07-19	10.48	8.236	4.498	12.14	9.738	4.186	4.371	5.828	6.02
2073-07-20	10.24	7.948	3.946	10.62	9.48	3.943	4.1	5.863	6.086
2073-07-21	9.907	7.623	3.134	9.281	9.017	3.747	3.715	5.99	6.172
2073-07-22	9.779	7.438	2.845	7.98	8.429	3.553	3.803	6.063	6.207
2073-07-23	9.449	7.187	2.626	6.86	8.059	3.549	3.847	6.06	6.037
2073-07-24	9.001	6.885	2.372	5.685	7.772	3.584	3.927	5.837	5.564
2073-07-25	8.622	6.795	2.42	4.518	7.536	3.819	3.931	5.235	5.029
2073-07-26	8.339	6.622	2.483	4.236	7.364	4.055	3.684	5.126	5.152
2073-07-27	8.039	6.372	2.693	3.975	7.044	4.136	3.235	5.162	5.383
2073-07-28	7.86	6.221	2.88	11.89	6.877	4.203	3.116	5.139	5.988
2073-07-29	7.855	6.012	2.961	13.88	6.803	4.206	3.123	5.158	6.887
2073-07-30	7.981	5.835	3.108	11.7	6.635	4.08	3.397	5.126	7.782
2073-07-31	8.043	5.936	3.18	9.527	6.401	4.027	3.445	4.951	8.415
2073-08-01	7.974	6.028	3.135	8.184	6.166	3.896	3.302	4.438	8.608
2073-08-02	7.779	6.007	3.014	7.158	6.081	3.902	2.973	4.41	8.301
2073-08-03	7.766	6.03	2.851	6.326	6.205	3.786	2.863	4.202	7.817
2073-08-04	7.48	5.957	2.645	5.542	6.781	3.506	2.656	4.243	7.279
2073-08-05	7.135	5.616	2.509	5.124	6.968	2.983	2.52	4.398	6.816
2073-08-06	6.869	5.33	2.314	4.992	7.003	2.638	2.69	4.478	6.498
2073-08-07	6.731	5.306	2.336	4.889	6.91	2.574	3.955	4.476	6.192
2073-08-08	6.596	5.261	2.376	4.877	6.7	2.711	4.673	4.547	5.952
2073-08-09	6.57	5.185	2.448	4.932	6.36	2.715	5.017	4.498	5.797
2073-08-10	6.319	5.096	2.513	4.778	5.93	2.824	5.085	4.353	5.606
2073-08-11	6.192	5.044	2.613	4.634	5.43	2.891	4.832	4.256	5.539
2073-08-12	6.039	5.065	2.571	4.37	5.218	2.899	4.341	4.11	5.367
2073-08-13	5.91	5.259	2.469	3.778	5.076	2.947	3.777	3.989	4.981
2073-08-14	5.737	5.303	2.252	3.148	5.213	2.852	3.279	4.045	4.238
2073-08-15	5.606	5.22	3.497	3.09	5.273	2.773	2.867	4.104	3.642
2073-08-16	5.591	4.766	4.134	3.046	5.398	2.677	2.496	4.21	3.681
2073-08-17	5.742	5.147	3.999	2.86	5.518	2.634	2.273	4.229	3.677
2073-08-18	5.842	5.073	3.824	2.901	5.549	2.547	2.339	4.219	3.769
2073-08-19	6.029	6.503	3.595	3.001	5.594	2.553	2.356	4.147	3.84
2073-08-20	6.22	6.967	3.298	3.105	5.527	2.476	2.254	4.182	3.954
2073-08-21	6.381	6.618	2.963	3.098	5.469	2.338	1.749	4.193	4.001
2073-08-22	6.45	6.677	2.619	2.998	5.318	2.346	1.693	4.201	4.01
2073-08-23	6.376	6.979	2.203	2.632	5.512	2.405	1.795	4.171	4.159
2073-08-24	6.163	12.55	1.912	2.267	5.769	2.453	1.941	4.172	4.104
2073-08-25	6.031	15.42	1.452	2.137	6.048	2.439	2.095	4.126	3.976
2073-08-26	5.861	14.91	1.42	2.133	6.201	2.298	2.182	4.133	3.962
2073-08-27	5.705	13.52	1.247	2.097	6.155	2.094	2.115	3.848	3.857
2073-08-28	6.968	11.82	1.24	2.001	5.952	1.959	1.924	3.428	3.721
2073-08-29	8.106	10.35	1.322	2.034	5.64	2.018	1.669	3.162	3.49
2073-08-30	9.686	8.916	1.421	2.087	5.251	2.101	1.585	3.099	3.314
2073-08-31	10.13	8.573	1.459	2.184	4.713	2.17	1.533	3.201	3.35
2073-09-01	10.73	9.016	1.521	2.386	4.42	2.125	1.542	3.291	3.589
2073-09-02	11.32	10.2	1.553	2.531	4.268	2.084	1.596	3.465	3.803
2073-09-03	16.93	11.53	1.52	2.613	4.301	2.034	1.607	3.534	3.91
2073-09-04	19.24	13.18	1.542	2.615	4.381	1.868	1.581	3.54	3.948
2073-09-05	18.58	14.5	1.668	2.534	4.395	1.717	1.523	3.43	3.902
2073-09-06	17.02	14.83	1.826	2.456	4.461	1.76	1.362	3.227	3.739
2073-09-07	15.14	14.55	1.88	2.436	4.398	1.902	1.41	3.851	3.99
2073-09-08	13.45	14.04	1.969	2.562	4.367	1.988	1.437	4.201	4.144
2073-09-09	29.27	13.16	1.915	2.654	4.324	2.029	1.379	4.508	4.206
2073-09-10	31.39	12.08	1.804	2.691	3.957	2.03	1.4	4.727	4.325
2073-09-11	32.99	11.23	1.71	2.643	3.546	1.988	1.466	4.952	4.411
2073-09-12	36.95	10.25	1.569	2.537	3.38	1.904	1.506	5.254	4.56
2073-09-13	40.73	9.364	1.561	2.404	3.491	1.898	1.593	5.461	4.734
2073-09-14	42.15	8.561	1.571	2.299	3.559	1.884	1.669	5.648	4.91
2073-09-15	48.39	7.883	1.596	2.215	3.588	1.926	2.247	5.732	5.001
2073-09-16	48.89	8.553	1.676	2.263	3.558	2.018	2.517	5.718	5.085
2073-09-17	47.31	9.143	1.715	2.38	3.448	2.033	2.508	5.704	5.13
2073-09-18	45.03	10.01	1.723	2.487	3.34	1.961	2.511	5.639	5.09
2073-09-19	41.31	10.64	1.718	2.545	3.399	1.893	2.444	5.842	5.082
2073-09-20	45.15	56.94	1.7	2.645	3.417	1.834	2.354	5.828	5.108
2073-09-21	44.13	66.4	1.683	2.669	3.504	1.726	2.216	5.971	5.261
2073-09-22	40.17	50.82	1.63	2.624	3.548	1.747	2.11	6.577	5.436
2073-09-23	36.77	37.3	1.572	2.54	3.627	1.726	2.035	6.653	5.854
2073-09-24	34.15	28.63	1.661	2.443	3.638	1.741	1.966	6.353	10.23
2073-09-25	38.11	22.76	1.75	2.363	3.616	1.802	1.927	6.043	12.88
2073-09-26	39.53	18.48	1.813	2.278	3.549	1.864	1.875	6.171	14.41
2073-09-27	38.79	15.21	1.895	2.226	3.569	1.901	1.842	11.01	16.34
2073-09-28	37.57	12.8	1.904	2.161	3.625	1.946	1.819	13.42	17.16
2073-09-29	35.85	10.97	1.898	2.131	3.658	1.956	1.804	13.5	16.86
2073-09-30	33.52	9.593	1.857	2.104	3.743	13.8	1.82	12.93	15.92
2073-10-01	30.79	9.869	1.774	2.074	3.769	20.51	1.833	12.27	14.75
2073-10-02	28.01	9.497	1.662	2.031	3.838	21.71	1.838	17.67	13.53
2073-10-03	25.34	8.665	1.542	1.98	3.881	20.58	1.958	23.85	12.13
2073-10-04	23.02	8.179	1.444	1.97	3.946	17.92	2.003	28.24	10.98
2073-10-05	21.12	8.418	1.414	1.963	3.949	14.4	2.06	29.14	10.36
2073-10-06	19.76	8.799	1.392	1.917	3.863	11.34	2.091	28.13	10.84
2073-10-07	18.88	8.801	1.367	1.871	3.736	8.903	2.113	26.28	12.6
2073-10-08	18.06	8.395	1.401	1.833	3.603	6.958	2.084	24.47	14.57
2073-10-09	17.44	7.823	1.489	1.819	3.429	5.475	2.057	24.75	16.46
2073-10-10	16.81	7.582	1.577	1.753	3.275	4.386	2.006	23.84	18.13
2073-10-11	16.28	7.861	1.608	1.691	3.303	3.685	1.94	22.41	18.85
2073-10-12	15.87	8.604	1.675	1.706	3.353	3.164	1.876	20.92	18.5
2073-10-13	15.51	8.71	1.757	1.783	3.356	2.742	1.762	18.88	17.31
2073-10-14	15.13	8.338	1.805	1.872	3.293	2.464	1.656	16.57	15.72
2073-10-15	14.83	7.9	1.824	1.903	3.141	2.271	1.549	14.47	14.21
2073-10-16	14.52	7.444	1.816	1.909	3.026	2.165	1.47	12.69	12.78
2073-10-17	14.18	6.897	1.757	1.884	3.006	2.106	1.48	11.08	11.63
2073-10-18	13.85	6.226	1.671	1.854	3.033	2.074	1.48	9.649	10.58
2073-10-19	13.55	5.444	1.594	1.849	3.41	2.022	1.5	8.555	11.06
2073-10-20	13.27	4.929	1.546	1.842	3.626	1.93	1.477	8.241	18.06
2073-10-21	13	4.679	1.5	1.894	4.325	1.835	1.439	9.866	25.44
2073-10-22	12.76	4.521	1.482	1.913	4.895	1.726	1.43	10.46	28.79
2073-10-23	12.48	4.394	1.465	1.888	5.204	1.696	1.411	14.07	31.43
2073-10-24	12.19	4.299	1.446	1.854	5.313	1.71	1.382	16.23	32.67
2073-10-25	12.05	4.248	1.427	1.817	5.244	1.744	1.309	17.52	33.01
2073-10-26	12.57	4.213	1.436	1.848	5.032	1.77	1.256	18.41	31.52
2073-10-27	12.69	4.22	1.441	1.948	4.771	1.802	1.244	18.76	28.97
2073-10-28	12.63	4.262	1.459	2.056	4.5	1.788	1.255	18.51	26.37
2073-10-29	12.63	4.208	1.479	2.141	4.218	1.772	1.289	17.64	24.6
2073-10-30	12.67	4.114	1.477	2.187	3.967	1.728	1.284	16.28	23.31
2073-10-31	12.59	4.047	1.458	2.219	3.923	1.683	1.261	24.68	22.48
2073-11-01	12.38	4.007	1.459	2.25	3.837	1.655	1.316	28.53	27.67
2073-11-02	12.04	4.01	1.471	2.251	3.731	2.231	2.675	28.82	32.29
2073-11-03	11.69	4.019	1.477	2.221	3.631	2.368	3.298	28.86	34.62
2073-11-04	11.3	4.006	1.479	2.172	3.548	2.561	3.364	28.4	37.3
2073-11-05	10.86	4	1.469	2.125	3.481	2.516	3.306	26.92	40.08
2073-11-06	10.44	3.998	1.451	2.079	3.429	2.53	3.159	26.36	41.98
2073-11-07	10.04	4.008	1.435	2.03	3.36	2.496	2.895	27.6	41.72
2073-11-08	9.69	3.954	1.416	1.975	3.311	2.878	2.784	26.95	39.83
2073-11-09	9.371	3.864	1.385	1.938	3.307	3.656	2.61	25.08	37.29
2073-11-10	9.064	3.805	1.39	1.893	3.274	3.865	2.434	23.3	35.57
2073-11-11	13.26	3.876	1.371	1.85	3.239	3.693	2.304	21.6	33.63
2073-11-12	17.38	4.379	1.355	1.817	3.185	3.453	2.209	19.99	31.72
2073-11-13	19.22	4.742	2.72	1.874	3.486	3.238	2.121	21.44	30.98
2073-11-14	20.71	5.027	3.904	1.968	3.605	3.031	2.045	21.96	30.21
2073-11-15	23.63	5.845	4.65	2.057	3.59	2.809	2.176	21.95	29.23
2073-11-16	24.9	6.359	5.302	2.237	3.812	2.624	2.397	23.68	28.48
2073-11-17	24.91	6.537	5.497	2.361	3.872	2.469	2.697	24.08	27.89
2073-11-18	24.53	6.55	5.284	2.411	3.913	2.511	3.01	25.15	31.04
2073-11-19	23.94	6.389	4.843	2.439	7.947	2.547	3.261	26.79	31.85
2073-11-20	23.17	6.069	4.624	2.491	9.842	2.601	3.404	37.82	30.66
2073-11-21	22.3	5.68	4.432	2.49	9.787	2.641	3.426	46.13	29.4
2073-11-22	21.39	5.291	4.195	2.437	9.36	2.694	3.356	58.75	28.4
2073-11-23	20.5	4.947	3.987	2.534	8.789	2.724	3.219	67.62	31.49
2073-11-24	19.72	4.661	3.922	2.707	8.522	3.1	3.116	73.1	35.9
2073-11-25	18.97	4.422	3.838	2.877	8.663	3.652	2.981	75.03	37.07
2073-11-26	20.1	4.387	3.652	2.956	9.406	3.779	2.84	76.27	39.14
2073-11-27	20.88	4.669	3.423	2.919	9.544	5.406	2.729	80.1	47.21
2073-11-28	22.59	4.962	6.375	2.984	10.03	12.71	2.633	79.15	50.47
2073-11-29	25.87	5.237	8.069	3.225	10.39	16.18	2.559	75.86	50.59
2073-11-30	32.7	5.554	8.172	3.498	10.36	16.86	2.477	72.41	50.08
2073-12-01	37.27	7.921	7.717	3.9	10.12	16.78	2.408	68.81	48.94
2073-12-02	40.48	11.8	6.973	4.074	10.75	16.34	2.336	64.68	46.93
2073-12-03	45.48	17.62	6.024	4.029	10.86	17.08	2.322	60.17	44.32
2073-12-04	48.66	20.86	5.083	3.834	10.59	16.74	2.328	55.65	41.5
2073-12-05	52.65	22.29	4.278	3.57	10.3	18	2.359	51.47	38.85
2073-12-06	53.71	25.09	3.64	3.285	10.04	19.11	2.379	47.78	36.51
2073-12-07	58.13	29.13	3.157	3.015	10	19.87	2.399	44.6	34.52
2073-12-08	57.63	30.29	2.787	2.783	9.71	20.36	2.408	41.93	32.87
2073-12-09	54.13	29.95	2.504	2.598	10.19	20.16	2.398	39.67	31.46
2073-12-10	50.44	29.36	2.28	2.451	10.36	19.13	2.522	37.77	30.28
2073-12-11	47.1	28.62	2.099	2.6	10.33	17.5	3.456	36.16	29.26
2073-12-12	44.39	27.44	1.955	2.722	10.29	15.57	4.669	34.74	28.38
2073-12-13	42.07	25.8	1.933	2.885	10.19	15.98	5.456	38.59	27.62
2073-12-14	40.15	23.96	2.191	3.303	9.958	15.43	6.097	40.68	26.91
2073-12-15	38.59	22.17	2.435	4.957	9.573	14.31	6.646	40.96	26.25
2073-12-16	37.32	20.7	2.562	5.995	9.118	13.88	6.907	41.09	25.62
2073-12-17	41.18	30.5	2.64	6.483	8.669	13.51	9.504	40.86	25.02
2073-12-18	42.28	35.01	2.684	6.663	8.244	12.98	10.67	39.9	24.43
2073-12-19	47.48	35.67	2.66	6.507	7.872	12.28	10.72	38.31	23.84
2073-12-20	49.67	37.23	2.58	6.058	7.576	11.5	10.67	36.34	23.29
2073-12-21	49.03	38.33	2.467	5.482	7.331	10.68	10.49	34.31	22.75
2073-12-22	48.22	37.85	2.329	5.122	7.119	9.876	10.08	32.43	22.22
2073-12-23	47.51	36.61	2.194	4.98	6.926	9.131	9.74	30.73	21.7
2073-12-24	49.62	35.5	2.035	4.865	6.759	8.535	12.91	29.25	21.19
2073-12-25	49.53	34.91	11.55	23.93	6.611	7.984	16.31	27.94	20.7
2073-12-26	47.94	33.84	18.37	38.59	6.473	7.503	19.52	26.8	20.21
2073-12-27	46.34	32.45	21.52	52.97	6.346	7.102	21.68	25.78	19.73
2073-12-28	44.92	31.13	23.51	66.44	6.232	6.767	21.83	24.88	19.27
2073-12-29	43.52	29.89	30.08	75.81	6.125	6.491	20.39	24.04	18.82
2073-12-30	48.35	32.64	32.2	79.11	6.032	6.279	23.28	23.27	18.38
2073-12-31	49.23	33.23	30.37	76.33	5.952	6.094	24.16	22.57	17.96
2074-01-01	48.72	32.48	27.21	69.32	5.868	6.358	23.36	21.89	17.54
2074-01-02	47.55	31.87	23.55	60.5	6.919	6.545	22.3	21.29	17.13
2074-01-03	46.32	31.29	19.79	51.74	8.196	6.629	20.95	20.64	16.71
2074-01-04	45.25	30.53	16.37	44.03	8.998	6.649	19.11	24.86	19.11
2074-01-05	44.1	29.55	13.5	37.63	9.534	6.55	17	27	20.53
2074-01-06	43.21	30.93	11.28	32.47	9.738	6.35	14.9	26.97	21.02
2074-01-07	42.18	32.23	9.603	28.36	9.484	6.093	13.22	26.01	21.47
2074-01-08	41.23	32.43	8.346	25.11	8.895	5.832	14.26	24.85	23.1
2074-01-09	40.63	32.61	7.385	22.47	10.41	5.6	15.27	23.09	23.73
2074-01-10	40.3	33.08	6.652	20.35	11.7	5.403	15.74	21.11	22.69
2074-01-11	42.15	34.96	6.085	18.63	12.21	5.207	16.38	20.92	21.05
2074-01-12	42.88	35.23	5.798	17.23	18.96	9.868	23.24	21.19	19.47
2074-01-13	42.71	34.58	5.576	21.59	25.63	16.63	26.78	21.79	19.28
2074-01-14	42.31	33.9	5.239	24.22	32.3	19.96	27.09	22.34	19.08
2074-01-15	41.85	33.18	8.99	27.36	38.09	21.67	26.56	22.17	18.87
2074-01-16	41.25	32.41	15.23	32.48	40.79	22.8	46.22	21.16	18.65
2074-01-17	40.86	32.16	21.07	37.53	39.94	22.74	52.8	19.74	18.09
2074-01-18	40.34	31.63	42.28	49.16	36.69	21.38	50.11	18.25	17.13
2074-01-19	39.69	31.59	52.91	56.1	32.71	19.15	47.85	16.98	15.92
2074-01-20	40.29	32.22	55.4	57.57	29.49	16.66	46.1	15.98	14.74
2074-01-21	40.36	33.11	55.8	57.79	26.76	14.36	45.83	15.2	13.72
2074-01-22	40.14	33.19	53.87	57.59	25.57	12.42	44.67	14.54	12.89
2074-01-23	40.57	37.95	49.22	56.31	24.78	10.85	42.72	13.95	12.22
2074-01-24	40.9	40.18	42.98	53.69	24	9.596	40.96	13.45	11.67
2074-01-25	40.98	40.68	36.54	50.08	23.5	8.615	39.54	13.01	11.23
2074-01-26	40.95	41.21	32.75	46.26	23.31	7.836	38.42	12.62	10.86
2074-01-27	40.79	41.56	33.48	43.13	23.25	7.201	56.96	12.27	10.51
2074-01-28	40.48	41.26	33.99	39.94	24.22	6.659	62.14	11.92	10.16
2074-01-29	39.98	40.21	34.42	37.06	24.38	7.611	62.73	11.58	9.854
2074-01-30	39.34	38.75	34.69	34.86	23.92	7.904	74.33	11.26	9.563
2074-01-31	38.55	37.17	34.56	33.1	23.41	7.746	80.82	10.98	9.279
2074-02-01	37.76	35.63	36.52	31.62	22.85	7.586	80.41	10.69	9.034
2074-02-02	36.96	34.3	36.38	30.38	22.1	7.341	77.06	10.42	8.794
2074-02-03	36.4	33.19	34.69	29.23	21.26	7.868	72.53	10.18	8.567
2074-02-04	39.92	34.65	32.66	28.7	20.24	10.23	67.43	9.934	8.347
2074-02-05	41.29	37.33	30.62	28.16	21.72	12.14	62.09	9.764	8.167
2074-02-06	41.17	37	28.59	27.62	21.72	14.24	56.9	22.36	9.833
2074-02-07	40.66	35.69	26.65	27.21	20.65	16.46	52.18	41.66	13.84
2074-02-08	39.67	34.79	24.86	26.88	19.75	18.49	48.14	67.07	22.43
2074-02-09	38.27	34.42	23.22	26.52	19.05	19.85	44.73	102.2	51.93
2074-02-10	36.82	34.34	21.93	26.02	18.56	20.41	41.94	120.2	81.6
2074-02-11	35.75	35.11	20.82	25.42	18.13	20.34	39.61	124.8	96.26
2074-02-12	34.86	35.65	19.86	24.79	21.96	19.7	37.96	123.7	104.3
2074-02-13	34.09	35.63	19.01	24.17	23.02	18.77	41.81	117.8	113.1
2074-02-14	33.6	35.28	18.29	23.48	22.17	18.31	44.08	108.3	116.5
2074-02-15	33.13	34.77	17.67	22.85	21.31	17.44	45.52	97.09	117.5
2074-02-16	34.43	34.14	17.1	22.4	20.59	16.37	47.49	85.87	116.7
2074-02-17	35.01	33.41	16.59	22.02	19.91	15.38	52.93	75.45	113.1
2074-02-18	34.6	32.7	16.14	21.84	19.17	14.43	54.9	66.08	106.4
2074-02-19	34.12	31.82	15.74	21.78	18.36	13.51	53.79	57.94	97.59
2074-02-20	34.43	31.76	15.37	21.84	17.54	12.77	51.79	51.43	88.38
2074-02-21	34.35	33.88	15.05	23.94	16.77	13.39	49.96	48.32	80.46
2074-02-22	33.92	34.65	15.05	27.51	16.21	13.37	48.42	46.03	76.53
2074-02-23	33.36	34.9	15.64	42.74	16.23	12.98	46.89	52.15	72.81
2074-02-24	32.75	35.32	17.19	58.22	16.11	12.71	45.2	56.44	69.33
2074-02-25	32.08	35.63	19.94	68.5	15.98	12.49	43.37	59.4	66.46
2074-02-26	31.34	35.53	23.33	74.44	17.28	12.16	47.24	62.69	64
2074-02-27	30.65	35	25.84	75.75	17.89	11.76	47.94	65.06	61.75
2074-02-28	29.95	34.17	26.77	72.78	17.61	11.45	46.42	65.52	59.47
2074-03-01	30.54	35.53	27.12	74.12	17.2	11.08	49.9	63.75	56.72
2074-03-02	30.08	35.52	26.63	73.96	18.18	10.74	50.72	60.77	54.1
2074-03-03	31.34	34.7	27.63	71.96	18.25	10.36	50.8	57.32	51.53
2074-03-04	35.27	34.17	33.78	68.74	17.93	10.06	50.39	54.21	49.07
2074-03-05	36.04	33.53	53.37	73.08	17.57	9.831	49.63	51.28	46.95
2074-03-06	36.65	34.79	81.02	75.35	17.08	9.574	48.67	48.32	44.84
2074-03-07	36.42	35.24	135.4	74.6	16.55	9.327	47.29	46.52	45.7
2074-03-08	35.96	40.24	187.5	73.62	16.28	9.161	45.54	44.85	45.29
2074-03-09	36	43.57	208.5	72.58	16.9	9.054	43.46	42.88	43.66
2074-03-10	36.01	45.46	206.2	71.25	17.23	8.932	42.37	41.19	44.04
2074-03-11	35.96	46.78	201.8	68.81	17.46	8.785	40.8	48.48	47.18
2074-03-12	36.06	47.09	185.8	65.57	17.67	8.638	38.9	50.26	52.91
2074-03-13	35.74	46.16	162	62.37	17.73	8.476	37.19	47.79	53.02
2074-03-14	35	44.39	139.3	59.49	17.52	8.338	35.87	45.41	50.48
2074-03-15	33.99	42.16	120.4	56.7	17.01	8.228	34.91	46.6	48.89
2074-03-16	32.98	39.89	105	54.15	16.42	8.247	33.71	51.07	48.75
2074-03-17	32.03	37.85	92.5	51.99	16.07	8.337	32.74	50.75	47.01
2074-03-18	31.24	36.07	82.17	50.03	15.41	8.483	32.01	48.44	44.91
2074-03-19	31.18	34.54	73.84	48.19	14.79	8.676	31.11	46.39	43.39
2074-03-20	30.51	33.19	67.06	46.46	14.66	8.664	32.08	44.69	42.08
2074-03-21	29.6	32	61.54	44.83	14.31	8.479	32.18	42.99	41.27
2074-03-22	28.84	31.01	57.01	43.38	13.62	8.169	31.59	41.15	40
2074-03-23	28.36	30.05	53.27	41.35	14.36	7.814	30.63	39.32	38.57
2074-03-24	28.59	30.26	50.11	39.5	15.28	7.457	31.01	38.56	38.01
2074-03-25	28.98	29.89	47.42	38.39	15.64	7.111	35.49	38.28	37.24
2074-03-26	34.72	28.96	45.11	37.29	15.69	6.877	37.76	37.29	36.2
2074-03-27	35.33	28.15	45.99	35.93	15.53	6.702	38.77	35.86	35.35
2074-03-28	33.74	27.36	52.56	34.84	15.24	6.476	39.68	34.43	34.78
2074-03-29	32.28	26.19	57.04	35.11	14.83	6.251	40.67	33.75	34.68
2074-03-30	31.15	25.14	59.8	37.91	14.14	6.031	40.29	32.97	34.45
2074-03-31	30.17	24.28	61.43	39.97	13.48	5.818	39.09	31.88	34.2
2074-04-01	28.93	23.42	62.91	42.06	12.83	5.632	37.67	30.79	33.71
2074-04-02	28.06	22.97	62.68	43.56	12.19	5.451	35.94	38.51	35.74
2074-04-03	26.98	22.36	60.91	44.04	11.69	5.236	33.65	39.97	36.58
2074-04-04	26.22	21.77	59.53	43.44	11.3	5	31.43	37.54	38.02
2074-04-05	25.46	21.38	59.55	42.22	10.91	4.794	30.03	39.34	39.27
2074-04-06	24.57	21.05	59.67	40.45	10.53	4.643	28.97	45.04	38.72
2074-04-07	23.82	20.62	59.3	39.67	10.16	4.472	28.4	46.87	37.19
2074-04-08	22.95	19.9	57.78	38.2	9.839	4.286	27.84	46.53	35.77
2074-04-09	22.67	19.61	54.93	36.16	9.549	4.128	27.2	45.91	34.62
2074-04-10	22.53	19.77	52.48	35.77	9.864	3.984	27.7	45.21	33.7
2074-04-11	22.03	19.76	51.55	34.18	10.56	3.809	28.75	43.8	32.83
2074-04-12	21.06	19.4	55.09	33.53	12.01	3.567	27.83	41.96	31.98
2074-04-13	20.8	19.12	55.3	33.63	17.95	3.481	26.47	39.85	31.04
2074-04-14	20.64	18.93	53.15	32.3	22.98	3.357	26.46	37.68	30.06
2074-04-15	20.17	18.42	51.25	30.51	25.38	3.341	31.2	35.51	29.56
2074-04-16	19.6	17.9	52.15	33.95	27.32	3.296	32.14	33.32	29.75
2074-04-17	19.3	17.57	51.54	34.41	28.83	3.289	30.89	34.03	29.5
2074-04-18	19.03	17.24	49.61	33.11	29.34	3.248	29.64	34.42	36.75
2074-04-19	18.56	16.74	47.73	32	28.48	3.244	28.9	35.15	39.76
2074-04-20	17.95	16.33	45.96	31.01	26.87	3.235	27.67	36.75	40.34
2074-04-21	17.33	15.91	48.61	31.84	25.05	3.17	26.4	39.38	40
2074-04-22	17.07	15.44	48.38	31.43	23.32	3.159	25.34	42.71	39.39
2074-04-23	16.73	15.03	58.56	30.6	21.86	3.135	24.04	46.6	39.51
2074-04-24	16.61	15.35	65.77	29.58	20.68	3.057	23.12	48.77	38.88
2074-04-25	16.27	15.38	67.32	28.24	22.84	2.887	24.11	51.34	37.66
2074-04-26	15.82	15.17	68.61	26.94	33.29	2.549	24.34	51.75	36.37
2074-04-27	15.43	15.29	71.94	26.13	36.85	2.079	24.51	50.05	34.81
2074-04-28	15.05	15.44	73.35	24.85	37.09	2.058	24.44	47.68	33.09
2074-04-29	14.6	15.52	72.68	26.51	37.32	2.127	24.28	45.19	31.45
2074-04-30	14.01	15.34	69.92	27.86	36.43	5.155	24.22	42.99	30.08
2074-05-01	13.66	14.94	66.23	29.01	35.86	6.246	23.89	40.76	28.77
2074-05-02	13.07	14.41	62.15	30.12	39.79	6.173	23.49	38.71	27.64
2074-05-03	12.75	13.81	58.13	30.39	38.92	6.074	22.6	36.71	26.54
2074-05-04	12.44	13.13	54.78	29.93	35.23	5.881	21.83	34.79	25.36
2074-05-05	12.03	12.5	52.19	28.89	31.95	5.402	20.9	32.92	23.8
2074-05-06	11.54	12.02	50.15	27.59	29.21	5.895	19.7	31.13	22.62
2074-05-07	11.29	11.53	47.75	26.66	26.97	6.797	18.56	29.7	21.84
2074-05-08	10.96	11.13	45.91	25.67	25.06	8.141	18.01	28.51	21.35
2074-05-09	11.14	10.85	44.18	24.63	23.22	9.069	17.46	27.08	21.27
2074-05-10	11.26	10.33	42.44	23.74	21.8	10.5	16.82	26.03	20.67
2074-05-11	11.33	10.04	41.15	22.67	20.56	11.56	16.38	25.02	20.08
2074-05-12	11.29	9.739	39.97	21.54	19.31	13.19	16.05	24.5	19.58
2074-05-13	11.25	10.44	38.66	20.51	19.09	22.54	15.8	24.03	19.6
2074-05-14	10.94	10.73	37.24	19.58	17.96	27.06	15.35	26.2	19.22
2074-05-15	10.14	10.46	36.72	18.52	16.96	28.09	14.79	27.26	18.82
2074-05-16	9.637	10.16	35.83	18.41	16.16	28.49	14.41	25.99	18.4
2074-05-17	9.421	12.06	35.35	17.97	15.9	28.44	14.05	24.21	17.81
2074-05-18	9.505	16.06	34.96	17.48	15.38	27.42	13.57	23.28	17.1
2074-05-19	9.887	16.11	34.72	16.98	15.23	27.2	13.08	22	16.28
2074-05-20	10.46	15.3	34.35	16.3	15.04	25.46	12.66	20.85	15.66
2074-05-21	10.65	14.75	33.95	16.06	15	23.57	12.25	19.58	15.14
2074-05-22	10.9	14.05	33.43	15.67	16.33	22.85	11.99	18.04	14.45
2074-05-23	11.3	14.15	32.75	15.25	17.16	22.12	11.97	16.67	13.54
2074-05-24	11.46	14.23	32.51	14.83	17.14	20.54	11.6	16.35	13.08
2074-05-25	11.28	28.11	32.15	14.46	16.99	18.98	11.39	16.17	12.39
2074-05-26	11.15	32.39	31.76	14.04	16.74	17.6	11.15	15.91	14.33
2074-05-27	11.1	29.39	44.28	13.67	15.94	16.7	11.1	15.72	15.34
2074-05-28	10.77	27.39	46.75	13.44	15.84	15.89	11.92	15.66	15.27
2074-05-29	10.29	27.46	41.91	13.06	15.9	15.12	13.08	15.52	14.81
2074-05-30	9.74	26.44	37.45	12.41	15.53	14.28	14.51	15.58	14.35
2074-05-31	9.142	24.97	34.24	11.97	14.97	13.77	15.71	15.47	13.93
2074-06-01	8.765	23.45	32.64	11.87	14.17	13.33	17.42	15.27	13.53
2074-06-02	8.587	21.94	30.26	11.52	13.24	12.78	18.7	15.05	12.99
2074-06-03	8.55	22.51	28.38	11.31	12.75	12.39	18.47	14.65	12.35
2074-06-04	8.716	21.98	26.72	11.04	12.32	11.8	17.51	14.17	11.43
2074-06-05	8.723	21.39	25.17	11.02	12	11.33	17.09	13.5	11.22
2074-06-06	8.605	23.28	24.05	11.15	11.74	11.09	17.53	12.82	11.22
2074-06-07	8.446	23.7	23.17	11.08	11.65	10.94	18.65	12.61	11.72
2074-06-08	8.189	23.89	22.86	11.01	11.62	10.86	19.45	12.25	11.65
2074-06-09	8.194	24.47	22.7	10.72	11.32	10.85	20.31	11.86	11.15
2074-06-10	13.28	25.01	22.16	10.75	11.04	10.85	20.04	11.25	10.99
2074-06-11	16.37	24.78	22.01	10.92	10.77	10.56	18.65	11.07	9.945
2074-06-12	18.72	29.66	21.6	10.64	10.12	10.19	17.22	11.11	8.8
2074-06-13	21.51	37.71	20.77	10.07	9.851	9.926	16.29	10.82	8.299
2074-06-14	23.25	42.67	19.62	9.566	10.46	9.645	15.49	10.8	7.906
2074-06-15	23.66	45.12	18.8	9.113	10.82	9.539	14.64	10.64	7.847
2074-06-16	22.94	46.29	17.84	8.799	10.67	9.43	13.98	10.66	8.007
2074-06-17	21.55	45.14	18.03	8.927	10.27	9.794	13.33	10.58	8.154
2074-06-18	19.6	42.27	17.9	9.142	10.77	10.03	12.79	10.81	8.287
2074-06-19	17.48	38.69	18.47	9.565	24.04	9.939	12.06	10.77	8.506
2074-06-20	15.91	35.43	17.88	9.681	27	9.752	12.74	10.64	8.732
2074-06-21	14.39	32.44	17.38	9.554	21.74	9.455	14.43	10.34	9.136
2074-06-22	13.14	29.4	17.97	9.37	17.27	8.979	15.3	9.313	9.281
2074-06-23	12.17	26.95	17.34	9.156	15.64	8.418	15.46	8.701	9.22
2074-06-24	11.41	24.71	16.51	9.25	14.55	7.991	16.08	8.284	9.081
2074-06-25	11.03	23.04	16.01	9.259	16.11	7.505	16.25	8.25	8.8
2074-06-26	10.87	21.43	15.83	9.399	15.83	7.093	16.06	8.288	8.263
2074-06-27	10.88	20.46	15.68	9.601	14.22	6.688	16.24	8.275	7.778
2074-06-28	10.95	19.81	15.1	9.545	12.54	6.445	15.66	8.328	6.735
2074-06-29	10.65	19.27	14.57	9.333	11.57	6.332	15.18	8.25	5.991
2074-06-30	10.53	18.23	14.16	9.077	10.99	6.269	14.48	8.053	5.998
2074-07-01	10.54	17.9	13.76	8.647	10.51	6.255	13.72	7.738	6.179
2074-07-02	10.42	17.82	13.51	8.145	9.963	6.285	13.34	14.42	6.489
2074-07-03	10.35	17.54	12.87	7.55	9.521	6.22	14.08	17.69	6.93
2074-07-04	10.05	22.1	12.3	6.969	9.014	6.147	14.16	17.62	7.297
2074-07-05	9.762	22.07	11.97	6.518	8.547	6.03	13.93	17.34	7.514
2074-07-06	10.22	19.61	11.44	6.321	7.973	5.595	13.66	15.65	7.368
2074-07-07	9.72	17.96	11.48	6.194	8.005	5.129	14.66	14.73	6.968
2074-07-08	9.381	17.51	11.24	5.887	12.41	4.91	15.37	12.95	6.522
2074-07-09	9.169	17.26	11.13	5.66	13.98	4.925	14.8	11.85	5.951
2074-07-10	8.613	18.36	11.13	6.232	14.37	4.912	14.01	17.68	5.367
2074-07-11	8.4	18.22	11.34	6.664	13.85	4.819	13.37	21.72	5.274
2074-07-12	7.835	17.32	11.09	6.867	12.42	4.576	12.76	23.13	5.177
2074-07-13	7.21	16.68	10.9	7.031	11.2	4.288	12.14	23.52	4.922
2074-07-14	6.352	16.17	11.03	7.001	9.757	4.028	11.68	30.74	4.982
2074-07-15	6.102	15.59	10.68	6.863	8.471	3.919	11.87	33.04	4.929
2074-07-16	5.578	15.27	10.15	6.664	6.894	3.947	11.46	29.03	4.845
2074-07-17	5.792	14.22	9.81	6.504	5.697	4.034	10.97	25	4.582
2074-07-18	5.921	14.14	9.385	6.234	4.894	3.94	10.21	23.25	4.234
2074-07-19	5.957	13.89	9.417	5.87	4.632	4.072	9.163	24.26	4.325
2074-07-20	5.956	13.47	9.369	5.357	4.508	4.014	8.183	26.56	4.316
2074-07-21	5.676	12.87	9.335	4.895	4.682	3.799	7.694	28.1	4.182
2074-07-22	4.871	12.01	9.188	4.604	4.752	3.536	7.403	28.8	3.748
2074-07-23	4.674	11.4	8.517	4.447	4.789	3.497	7.347	28.58	3.311
2074-07-24	4.499	10.95	8.026	4.381	5.379	3.428	7.391	27.49	3.04
2074-07-25	4.157	10.42	7.695	4.33	5.735	3.599	7.453	25.73	3.033
2074-07-26	3.822	9.787	7.605	4.158	5.573	3.687	7.44	24.02	3.085
2074-07-27	3.734	9.508	7.402	5.143	5.484	3.747	7.269	22.48	3.167
2074-07-28	3.776	9.407	7.307	5.661	8.387	4.07	6.66	20.47	3.224
2074-07-29	3.785	9.435	7.258	5.953	9.757	4.161	6.225	18.88	3.362
2074-07-30	3.629	9.906	7.73	6.004	9.839	4.039	5.827	17.55	3.28
2074-07-31	3.475	10.76	7.807	5.865	9.843	3.95	5.481	15.93	2.874
2074-08-01	3.421	13.18	7.888	5.649	9.418	3.713	5.304	14.59	2.23
2074-08-02	3.566	16.36	7.847	5.308	8.642	3.197	5.157	13.5	2.213
2074-08-03	3.6	19.57	7.735	4.883	7.64	3.002	5.107	12.52	2.097
2074-08-04	3.578	21.38	7.511	4.19	6.563	2.728	6.121	11.76	2.262
2074-08-05	6.913	21.09	7.075	3.412	5.573	2.402	7.431	11.6	2.516
2074-08-06	8.022	19.13	6.449	3.404	4.469	2.381	8.611	11.34	2.636
2074-08-07	7.753	17.29	6.343	3.43	3.974	2.344	9.341	11.02	2.621
2074-08-08	7.42	15.68	6.216	3.433	3.527	2.247	9.464	10.76	2.415
2074-08-09	6.919	14.12	6.084	3.374	3.268	2.135	9.567	10.72	2.328
2074-08-10	6.905	12.65	6.035	3.273	3.565	2.207	9.733	10.01	2.185
2074-08-11	6.574	11.75	5.913	3.17	3.741	2.298	9.729	9.196	2.082
2074-08-12	5.987	11.32	5.637	2.862	3.913	2.371	9.347	8.89	2.128
2074-08-13	5.413	10.57	5.278	2.882	4.053	2.422	8.674	8.474	2.157
2074-08-14	4.798	10.64	5.418	2.895	4.099	2.676	7.972	7.775	2.159
2074-08-15	4.21	11.14	5.524	2.983	4.042	2.742	7.203	7.545	2.129
2074-08-16	3.927	11.52	5.581	3.077	4.009	2.832	6.57	7.517	2.124
2074-08-17	3.648	12.01	5.583	3.089	4.003	2.859	5.956	7.297	2.137
2074-08-18	7.076	12.25	5.479	3.038	4.102	2.789	5.132	7.144	2.168
2074-08-19	8.554	12.11	5.175	2.766	3.975	2.79	4.576	6.9	2.242
2074-08-20	8.616	12.41	6.715	2.547	3.825	2.701	4.522	6.409	2.246
2074-08-21	8.355	12.08	6.765	2.584	3.646	2.593	4.524	5.636	2.129
2074-08-22	7.702	11.62	6.044	2.632	3.418	2.582	4.369	5.445	2.105
2074-08-23	6.812	11.41	5.631	2.614	3.103	2.616	3.871	5.156	2.042
2074-08-24	5.831	11.1	5.421	2.441	2.733	2.674	3.805	4.982	1.81
2074-08-25	4.911	11.07	5.348	2.408	2.729	2.623	3.936	5.003	1.805
2074-08-26	4.162	10.7	5.286	2.545	2.864	2.573	4.111	4.911	1.848
2074-08-27	3.255	10.03	5.214	2.658	2.997	2.367	4.22	4.684	1.837
2074-08-28	2.915	9.324	5.041	2.71	2.993	2.12	4.263	4.281	1.803
2074-08-29	2.813	8.851	4.786	2.73	2.908	1.966	4.318	3.917	1.84
2074-08-30	2.711	8.369	4.709	2.728	2.885	1.976	4.279	3.967	1.779
2074-08-31	2.545	7.518	4.644	2.701	2.904	2.052	4.1	3.981	1.64
2074-09-01	2.556	7.206	4.391	2.647	2.954	2.097	4.072	4.06	1.627
2074-09-02	2.493	7.122	4.064	2.546	2.934	2.073	4.177	4.071	1.528
2074-09-03	2.429	6.753	18.23	2.241	2.907	3.169	4.335	4.094	1.595
2074-09-04	2.404	6.551	59.72	2.161	2.841	3.514	4.411	4.121	1.79
2074-09-05	2.393	6.14	63.24	2.193	2.574	3.493	4.367	4.18	1.932
2074-09-06	2.248	6.096	39.78	2.197	2.183	3.501	4.341	4.168	2.048
2074-09-07	2.337	5.735	20.27	2.229	2.4	3.381	4.311	4.062	2.102
2074-09-08	2.442	5.192	10.89	2.252	2.604	3.101	4.175	3.968	2.56
2074-09-09	5.714	5.422	6.941	2.276	2.712	2.707	3.764	4.026	2.69
2074-09-10	6.817	5.517	5.22	2.372	2.819	2.396	3.563	4.032	2.811
2074-09-11	6.604	5.484	4.459	2.451	2.869	2.112	3.512	4.002	3.458
2074-09-12	6.375	5.29	4.072	2.506	2.873	1.771	3.567	3.982	3.665
2074-09-13	6.073	4.827	3.941	2.504	2.833	1.527	3.614	4.741	3.695
2074-09-14	5.572	4.802	3.75	2.434	2.735	1.604	3.674	5.207	3.716
2074-09-15	4.936	4.777	3.693	2.324	2.702	1.681	3.743	5.403	3.687
2074-09-16	4.281	4.612	3.662	2.281	2.562	1.721	3.76	5.486	3.678
2074-09-17	3.966	4.678	3.674	2.246	2.397	1.702	3.735	5.394	3.69
2074-09-18	3.675	4.671	3.674	2.252	2.262	1.656	3.569	5.298	3.619
2074-09-19	3.401	4.637	3.681	2.316	2.218	1.592	3.413	5.106	3.515
2074-09-20	3.149	6.014	3.598	2.283	2.243	1.517	3.39	4.924	3.348
2074-09-21	2.982	6.566	3.428	2.077	2.315	1.479	3.401	4.664	3.134
2074-09-22	2.847	6.735	3.276	2.178	2.313	1.422	3.357	4.336	2.867
2074-09-23	2.749	7.076	3.229	2.306	2.352	1.389	3.075	3.837	2.631
2074-09-24	2.715	10.19	3.249	2.387	2.415	1.398	2.8	3.451	2.524
2074-09-25	2.673	12.15	3.339	2.401	2.429	1.528	2.782	3.26	2.391
2074-09-26	2.641	12.09	3.464	2.555	2.406	1.748	2.744	3.358	2.384
2074-09-27	2.58	11.37	3.509	2.537	2.338	1.969	2.726	3.591	3.998
2074-09-28	2.456	10.58	3.564	2.514	2.243	2.175	2.752	3.765	4.816
2074-09-29	2.2	9.829	3.627	2.505	2.146	2.299	2.756	3.859	4.817
2074-09-30	2.073	8.915	3.65	2.562	2.152	2.346	2.759	3.879	4.63
2074-10-01	2.096	7.993	3.599	2.61	2.202	2.303	2.71	3.866	12.07
2074-10-02	2.154	7.201	3.604	2.539	2.182	2.195	2.647	3.809	15.32
2074-10-03	2.158	6.538	3.614	2.571	2.248	2.076	2.585	3.724	14.93
2074-10-04	2.117	6	3.66	2.574	2.226	1.971	2.616	3.611	14.04
2074-10-05	2.047	5.56	3.707	2.557	2.199	1.881	2.665	3.502	13.19
2074-10-06	2.023	5.227	3.735	2.534	2.261	1.78	2.727	3.153	12.13
2074-10-07	1.95	4.981	3.799	2.589	2.259	1.687	2.799	2.812	10.97
2074-10-08	1.946	4.758	3.944	2.722	2.279	1.635	2.852	2.779	9.76
2074-10-09	1.958	4.528	3.997	2.748	2.223	1.589	2.872	2.702	8.5
2074-10-10	1.982	4.417	3.987	3.008	2.135	1.554	2.863	2.719	7.368
2074-10-11	2.001	4.311	3.974	3.109	2.012	1.491	2.811	2.765	6.432
2074-10-12	1.988	4.227	3.907	3.021	1.911	1.426	2.717	12.44	11.45
2074-10-13	1.96	4.207	3.798	2.899	1.896	1.384	2.568	16.21	12.84
2074-10-14	1.926	4.169	3.646	2.774	1.891	1.617	2.555	16.59	11.68
2074-10-15	1.93	4.185	3.504	2.67	1.849	1.699	2.624	16.5	10.49
2074-10-16	1.954	4.161	3.332	2.559	1.809	1.962	2.805	16.07	9.509
2074-10-17	1.984	4.046	3.141	2.426	1.818	2.131	3.105	15.07	10.06
2074-10-18	1.974	3.846	3.031	2.318	1.822	3.254	3.48	13.74	15.41
2074-10-19	1.933	3.738	2.964	2.529	1.861	3.703	3.931	12.52	16.9
2074-10-20	1.832	3.68	3	2.622	1.878	3.641	4.243	11.95	15.82
2074-10-21	1.803	3.594	3.036	2.707	1.853	3.465	4.487	10.91	14.47
2074-10-22	1.813	3.536	3.068	2.635	1.742	3.27	4.872	9.549	13.24
2074-10-23	1.84	5.57	3.108	2.652	1.595	3.009	4.923	8.381	12.78
2074-10-24	1.859	6.626	3.123	2.619	1.58	2.726	4.834	8.586	12.54
2074-10-25	1.872	6.887	3.681	4.97	1.652	2.455	4.651	8.437	11.92
2074-10-26	1.881	7.011	3.71	5.827	1.748	2.241	5.011	12.01	11.27
2074-10-27	1.876	7.269	3.48	5.522	1.789	2.084	4.858	13.46	12.56
2074-10-28	1.864	7.322	3.329	7.072	1.812	1.99	4.455	13.28	15.84
2074-10-29	1.841	6.992	3.212	7.486	1.832	1.923	4.174	12.9	17.25
2074-10-30	1.799	6.627	3.122	6.944	1.842	1.87	4.009	12.44	17.3
2074-10-31	1.942	6.314	2.996	6.269	1.795	1.825	3.85	11.81	17.59
2074-11-01	2.076	6.118	2.875	5.549	1.741	1.774	3.698	11.15	16.87
2074-11-02	2.179	6.065	2.807	4.825	1.72	1.71	3.558	10.4	16.27
2074-11-03	2.272	6.123	2.777	4.183	1.706	1.654	3.445	9.62	14.95
2074-11-04	2.336	6.586	2.788	3.678	1.717	4.258	3.36	8.879	14.26
2074-11-05	2.372	8.112	2.819	3.296	1.796	4.91	3.31	9.094	13.89
2074-11-06	2.367	9.541	2.836	3.019	1.953	4.177	3.242	8.974	12.75
2074-11-07	2.342	10.5	2.834	2.814	2.963	3.477	3.2	8.638	11.43
2074-11-08	2.31	10.87	2.817	2.662	3.481	3.587	3.17	8.364	15.76
2074-11-09	2.268	10.93	2.758	2.667	3.582	5.487	3.205	8.121	17.33
2074-11-10	2.215	10.85	2.719	2.599	3.591	6.34	3.178	8.644	18.23
2074-11-11	2.161	10.53	2.702	2.461	3.569	6.324	3.573	9.543	20.13
2074-11-12	2.103	10.05	2.647	2.325	3.516	6.532	3.509	10.2	21.28
2074-11-13	2.057	9.491	2.635	2.588	3.417	6.333	3.373	10.45	21.17
2074-11-14	2.013	8.913	2.582	10.1	3.293	5.827	3.332	11.21	21.83
2074-11-15	1.971	8.385	2.581	13	3.196	5.884	7.284	11.95	21.5
2074-11-16	1.931	7.939	2.533	12.34	3.113	5.672	9.617	12.25	20.34
2074-11-17	1.899	7.565	2.524	11.22	3.409	5.231	9.761	12.34	18.96
2074-11-18	1.86	7.253	2.512	10.01	5.107	5.206	9.5	14.42	19.5
2074-11-19	1.802	7.767	2.487	8.701	5.928	5.914	9.403	17.13	22.1
2074-11-20	1.761	8.247	2.464	7.388	6.168	5.9	9.258	18.26	24.79
2074-11-21	1.74	8.922	2.44	6.238	6.243	5.403	8.957	18.73	25.93
2074-11-22	1.713	9.405	2.331	5.32	6.706	4.865	8.453	21.66	28.73
2074-11-23	1.69	9.646	4.024	4.611	6.878	4.334	7.842	23.07	36.42
2074-11-24	1.664	9.85	5.091	6.091	6.768	3.816	7.209	23.93	39.19
2074-11-25	1.662	9.876	5.561	7.511	6.586	3.37	6.618	25.11	41.07
2074-11-26	1.672	9.731	5.176	8.62	7.163	3.011	6.104	25.69	41.48
2074-11-27	1.668	9.72	4.49	9.359	7.588	2.743	5.99	25.69	46.03
2074-11-28	1.669	10.69	3.936	9.433	7.634	2.545	7.237	26.9	47.13
2074-11-29	1.683	11.32	3.57	8.877	7.626	2.663	7.737	26.64	45.1
2074-11-30	1.71	11.65	3.317	7.941	7.642	2.705	8.173	25.35	42.3
2074-12-01	2.196	14.2	3.133	7.158	7.601	2.679	11.32	24	39.43
2074-12-02	2.415	15.96	2.989	6.564	7.466	2.646	12.59	22.78	38.48
2074-12-03	2.406	16.8	2.875	6.049	7.284	2.593	12.66	21.69	37.72
2074-12-04	2.396	17.53	2.789	5.953	7.018	2.51	13.07	20.69	36.41
2074-12-05	2.437	18.72	2.72	7.714	6.691	8.194	15.2	19.8	35.18
2074-12-06	2.648	20.29	2.639	8.547	6.376	12.52	16.98	19	34.4
2074-12-07	2.762	21.46	2.571	8.666	6.089	14.97	17.18	18.3	33.85
2074-12-08	2.794	22.01	2.528	10.74	5.84	16.62	16.86	17.7	33.16
2074-12-09	3.71	23.83	2.503	11.4	5.623	17.03	22.08	17.18	32.15
2074-12-10	5.192	28.77	2.464	11	5.45	16.08	24.79	16.71	30.9
2074-12-11	5.797	31.34	2.397	10.47	5.962	14.74	25.21	16.29	29.55
2074-12-12	5.843	32.54	2.343	9.899	8.055	14.43	25.22	15.93	28.22
2074-12-13	5.733	33.6	2.308	9.192	9.362	15.86	24.87	15.58	28.57
2074-12-14	5.511	34.31	2.294	8.383	9.704	15.93	23.86	15.28	29.51
2074-12-15	5.202	34.35	2.234	7.563	10.03	16.06	22.27	15.01	29.97
2074-12-16	4.834	33.66	2.19	6.821	14.53	22.57	20.96	14.91	30.23
2074-12-17	4.455	32.48	2.139	7.57	16	24.24	19.6	15.11	31.77
2074-12-18	4.107	31.07	5.618	8.445	15.4	22.5	23.5	16.29	32.35
2074-12-19	3.811	30.58	7.018	8.592	15.4	20.46	25.55	17.09	34.54
2074-12-20	4.448	36.71	6.691	8.516	15.31	18.52	28.24	18.11	37.52
2074-12-21	4.336	39.64	6.234	8.339	14.93	16.54	30.5	19.29	40.51
2074-12-22	3.822	40.14	5.798	7.968	14.39	14.57	32.04	20.8	45.96
2074-12-23	3.468	40.8	5.255	7.395	13.76	12.75	32.83	21.52	49.38
2074-12-24	3.285	41.39	4.645	6.739	12.96	11.17	32.6	21.64	50.46
2074-12-25	3.186	41.27	4.063	6.116	12.16	9.873	31.47	21.38	50.13
2074-12-26	3.087	40.34	3.577	5.58	11.4	8.794	29.74	20.87	48.7
2074-12-27	3.001	38.89	3.197	5.141	10.73	7.909	27.84	20.16	46.5
2074-12-28	2.927	37.21	2.908	4.796	10.14	7.191	26.01	19.39	43.98
2074-12-29	2.879	35.49	2.689	4.524	9.632	6.603	24.33	18.63	41.52
2074-12-30	2.833	33.94	2.516	4.291	9.22	11.7	26.09	17.95	39.27
2074-12-31	2.8	32.6	2.374	4.102	8.871	16.45	27.59	17.4	50.44
2075-01-01	2.774	31.44	2.251	3.952	8.598	19.3	27.9	16.93	62.56
2075-01-02	2.747	30.46	2.155	3.826	8.41	21.45	28.03	16.52	65.94
2075-01-03	2.716	29.6	2.042	3.735	8.273	22.56	28.24	16.35	66.51
2075-01-04	2.682	28.82	1.92	3.677	8.419	22.01	28.19	16.15	66.95
2075-01-05	2.657	28.1	1.873	3.659	8.608	20.2	27.7	15.78	65.96
2075-01-06	2.634	27.41	1.82	3.638	9.398	17.86	27	15.39	62.64
2075-01-07	2.598	26.76	1.779	3.566	10.76	16.76	26.11	15.06	57.69
2075-01-08	2.549	26.11	1.765	3.482	11.6	18.86	25.22	14.72	52.24
2075-01-09	2.512	25.49	1.718	3.375	12.08	19.15	24.42	14.42	47.22
2075-01-10	2.48	24.9	1.717	3.28	13.01	19.33	23.79	14.14	42.99
2075-01-11	2.447	24.31	1.704	3.201	13.44	22.05	23.13	13.87	39.56
2075-01-12	2.402	23.7	1.705	3.138	13.48	23.09	28.64	13.64	36.84
2075-01-13	2.366	23.17	1.684	3.079	14.06	22.74	30.5	13.42	34.64
2075-01-14	2.498	23.24	1.642	3.021	14.21	21.92	30.03	13.21	32.84
2075-01-15	2.523	23.21	1.575	2.956	15.16	20.88	29.65	13	31.32
2075-01-16	3.374	23.43	1.575	2.901	15.49	19.56	29.41	12.72	29.96
2075-01-17	3.541	24.36	1.541	2.829	15.39	18.14	28.99	12.5	28.78
2075-01-18	4.088	26.46	1.507	2.761	15.59	16.73	28.28	12.26	27.68
2075-01-19	5.34	30.13	1.447	2.698	15.6	15.55	27.32	12.01	26.67
2075-01-20	6.779	34.55	1.445	2.648	15.41	15	26.34	11.77	25.76
2075-01-21	7.949	37.99	1.432	2.605	15.14	18.56	25.51	11.55	32.87
2075-01-22	8.429	39.18	1.392	2.558	14.94	19.98	24.8	11.33	35.07
2075-01-23	8.068	38.08	1.376	2.52	14.72	19.7	24.24	11.11	33.56
2075-01-24	7.16	35.56	1.35	2.47	15.82	19.4	23.68	21.02	45.97
2075-01-25	6.088	32.64	1.371	2.501	17.82	20.14	23.21	39.92	73.3
2075-01-26	5.115	29.85	1.358	2.57	18.61	23.34	26.41	46.02	87.6
2075-01-27	4.322	27.53	1.362	2.673	19.23	26.04	27.38	45.95	104.7
2075-01-28	3.714	25.5	1.328	2.772	19.97	26.77	27.05	65.42	131.2
2075-01-29	3.253	23.81	1.267	2.853	21.89	27.28	26.92	88.53	150
2075-01-30	2.894	22.37	1.265	2.911	23.34	27.77	27	96.5	153
2075-01-31	2.655	21.17	1.266	2.904	23.78	27.77	27.01	97	146
2075-02-01	4.134	20.14	1.246	2.803	23.36	27.01	26.76	94.86	135.6
2075-02-02	9.383	19.25	1.23	2.675	23.19	25.77	26.25	104	123.1
2075-02-03	29.39	19.05	1.161	2.535	23.45	24.23	25.6	111.3	110.5
2075-02-04	60.99	20.43	1.171	2.416	23.52	22.7	24.88	111.8	100.2
2075-02-05	84.26	22.05	1.186	2.285	23.28	21.31	24.28	114	93.16
2075-02-06	98.61	27.87	1.193	2.167	23.19	20.1	23.85	117.6	88.86
2075-02-07	104.2	34.58	1.151	1.967	23.19	19.06	23.48	119.1	86.03
2075-02-08	100.4	44.14	1.08	1.908	23.24	18.61	23.18	116.8	83.39
2075-02-09	90.83	49.3	1.018	1.91	23.13	17.97	22.9	111.4	80.27
2075-02-10	80.64	49.82	1.02	1.831	22.84	17.29	22.47	104	76.51
2075-02-11	72.11	47.94	1	6.075	22.38	16.67	21.99	95.75	72.29
2075-02-12	63.81	44.36	1.009	10.38	21.93	16.09	21.44	87.33	67.89
2075-02-13	56.37	39.95	1.023	15.58	21.38	15.61	20.87	79.21	63.62
2075-02-14	50.02	35.56	1.024	22.17	20.88	15.15	20.36	71.95	59.76
2075-02-15	44.48	31.76	1.036	30.4	20.48	14.73	19.88	65.57	56.47
2075-02-16	39.99	28.74	1.002	39.59	20.1	14.33	19.43	60.09	53.78
2075-02-17	36.07	26.44	0.9766	48.15	19.72	13.96	18.99	55.45	51.42
2075-02-18	32.65	24.7	0.9194	54.04	19.4	13.61	18.56	51.5	49.23
2075-02-19	29.86	23.36	0.8788	57.04	19.03	13.26	18.19	48.11	47.47
2075-02-20	27.45	22.38	0.831	57.51	18.67	13.04	17.81	45.21	45.64
2075-02-21	25.42	21.59	11.03	62.33	18.34	15.46	17.44	42.71	43.84
2075-02-22	23.71	21.27	16.13	74.39	18.02	17.43	17.16	40.52	42.17
2075-02-23	22.17	21.21	16.56	86.12	17.7	17.63	17.56	38.59	40.62
2075-02-24	20.91	20.96	16.09	97.8	17.39	18.02	19.65	36.83	39.34
2075-02-25	19.84	20.7	14.98	111.7	17.04	19.94	22.66	35.22	39.69
2075-02-26	18.92	20.65	13.16	115.1	16.7	20.5	24.04	33.92	38.99
2075-02-27	18.08	20.4	10.95	108.3	16.45	20.31	24.84	32.64	37.67
2075-02-28	17.28	19.99	8.831	97.08	16.16	20.31	25.61	31.47	36.61
2075-03-01	16.55	20.32	7.001	84.51	15.88	27.56	26.05	30.35	35.63
2075-03-02	16.5	21.25	5.537	72.33	15.57	29.78	26.21	29.25	34.69
2075-03-03	16.19	22.72	4.422	61.39	15.32	28.7	25.61	28.19	33.73
2075-03-04	25	25.32	3.572	52.18	21.51	35.3	26.77	27.35	32.9
2075-03-05	28.62	28.95	2.932	44.78	27.52	37.69	26.68	26.54	32.15
2075-03-06	28.53	32.85	2.428	39.04	32.81	37.1	25.42	25.99	31.38
2075-03-07	28.77	37.65	3.019	34.65	37.97	36.2	24.47	28.99	30.61
2075-03-08	29.4	40.38	4.353	35.69	41.47	38.16	23.8	29.91	29.85
2075-03-09	29.5	41.14	4.995	43.71	42.14	39.55	22.9	29.94	29.15
2075-03-10	28.8	40.79	7.294	55.64	40.21	48.11	24.18	30.33	28.5
2075-03-11	27.42	39.74	15.37	87.17	36.8	52.71	26.37	31.06	28.03
2075-03-12	25.72	38.4	42.82	121.5	33.25	55.39	26.69	31.53	27.61
2075-03-13	23.96	36.89	93.24	122.8	30.51	58.26	26.11	31.38	27.23
2075-03-14	22.31	35.22	146.1	108.6	28.1	59.8	25.75	30.57	26.74
2075-03-15	20.81	35.25	193	96.85	25.99	58.98	25.49	29.73	26.2
2075-03-16	19.45	36.21	237.2	93.59	24.29	58.45	26.05	29.74	25.57
2075-03-17	18.26	35.26	245.2	92.17	22.71	55.43	26.74	29.9	24.93
2075-03-18	17.56	33.87	221.2	92.26	21.41	51.52	26.47	30.97	24.32
2075-03-19	16.94	33.42	189.9	89.57	19.93	47.67	25.7	32.29	23.78
2075-03-20	16.28	32.7	162.2	84.97	18.85	44.46	24.65	33.18	23.13
2075-03-21	15.87	31.95	139.2	79.89	18.17	41.99	23.43	33.06	22.46
2075-03-22	15.88	31.53	120.5	74.95	17.66	39.84	22.38	32.04	21.77
2075-03-23	16.16	31.2	105.1	70.85	17.32	41.07	21.58	30.48	21.07
2075-03-24	17.93	30.89	92.02	68.35	16.8	41.05	22.47	28.75	20.43
2075-03-25	18.65	30.75	80.8	65.14	16.49	39.46	24.99	26.95	20.03
2075-03-26	18.76	30.86	71.12	61.65	16.2	37.74	25	25.3	19.37
2075-03-27	20	40.56	63.24	58.46	15.88	36.79	24.34	23.91	18.84
2075-03-28	20.8	43.78	58.28	55.6	15.64	47.27	24.18	22.74	18.17
2075-03-29	21.19	42.93	54.55	52.84	15.5	48.96	24.19	21.82	17.77
2075-03-30	21.2	42.51	50.27	50.15	15.33	44.71	23.94	21.02	17.32
2075-03-31	20.97	42.41	46.6	47.6	15.11	40.87	23.56	20.32	16.93
2075-04-01	20.3	41.61	43.77	45.15	14.82	38.85	28.17	19.62	16.63
2075-04-02	19.65	40.68	41.41	42.82	14.6	36.63	28.99	19.34	16.82
2075-04-03	18.81	39.24	40.01	40.99	14.38	34.32	27.45	18.87	16.35
2075-04-04	18.13	37.61	38.37	39.36	14.12	32.14	26.13	18.36	15.65
2075-04-05	20.35	36.19	36.5	37.76	13.45	29.93	25.14	17.88	15.12
2075-04-06	21.86	41.53	34.52	36.39	12.77	27.93	24.35	17.26	14.64
2075-04-07	22.37	42.73	32.83	35.07	12.34	26.23	23.57	17	14.32
2075-04-08	25.1	41.68	31.16	33.74	11.96	24.79	22.53	16.92	13.89
2075-04-09	28.82	41.79	29.47	32.6	11.75	23.61	21.52	16.18	13.33
2075-04-10	41.04	43.05	28.01	31.55	11.73	22.42	20.58	15.47	12.9
2075-04-11	46.14	43.99	27.01	30.63	11.52	21.57	19.62	15.4	12.87
2075-04-12	46.77	44.51	26.12	29.89	11.32	21	18.64	15.22	12.66
2075-04-13	47.33	44.69	25.16	29.03	11.1	20.38	18.51	14.82	12.19
2075-04-14	48.71	44.82	23.99	28.02	10.7	19.85	17.49	14.26	11.79
2075-04-15	48.43	44.72	23.23	27.04	10.34	19.27	17.2	14.15	11.61
2075-04-16	46.49	44.44	22.48	26.21	10.1	18.56	17.42	13.86	11.49
2075-04-17	44.04	43.45	21.75	25.55	9.831	17.93	17.04	13.51	11.4
2075-04-18	41.42	42.46	20.96	24.84	9.421	17.08	16.66	13.18	11.05
2075-04-19	38.66	41.07	20.04	24.09	9.244	16.58	16.56	12.9	10.76
2075-04-20	36.04	39.57	19.3	23.54	9.017	16.63	16.37	12.44	10.57
2075-04-21	33.59	38.63	18.85	23.05	8.736	16.25	15.98	12.28	10.43
2075-04-22	31.68	39.17	18.35	22.44	8.479	16.38	15.45	12.02	10.3
2075-04-23	30.08	41.05	17.81	22	8.256	16.29	14.92	11.61	10.17
2075-04-24	28.47	43.27	17.6	21.51	7.878	16.1	14.46	11.5	10.43
2075-04-25	26.85	44.28	17.29	21.07	8.785	15.54	14.01	11.42	10.2
2075-04-26	25.55	44.04	16.71	20.34	9.187	14.93	14	11.17	9.67
2075-04-27	25.35	43.15	15.89	19.57	9.056	14.37	13.71	10.84	9.233
2075-04-28	25.71	41.79	15.3	19.1	8.908	13.96	13.5	10.45	8.706
2075-04-29	25.75	40.01	14.91	18.77	9.568	13.45	13.4	10.06	8.153
2075-04-30	27.23	38.19	14.38	18.22	9.628	12.9	13.41	9.631	7.709
2075-05-01	27.13	36.7	13.95	17.81	10.09	12.34	13.35	9.263	7.471
2075-05-02	25.9	35.34	13.61	17.36	13.61	12.18	13.05	8.935	7.314
2075-05-03	24.74	33.92	13.1	16.97	14.05	12.08	12.8	8.497	7.558
2075-05-04	23.23	32.6	12.56	16.75	12.36	12.02	12.59	7.939	7.206
2075-05-05	22	31.99	12.08	16.26	10.97	11.81	12.3	7.559	6.731
2075-05-06	20.9	31.24	12.06	16.24	10.12	11.48	11.98	7.498	6.411
2075-05-07	19.57	30.28	11.87	15.82	9.484	11.2	11.76	7.302	6.232
2075-05-08	18.62	29.26	11.82	15.7	8.883	11.2	12.03	7.091	6.048
2075-05-09	17.48	28.39	13.2	18.62	8.323	11.17	11.62	7.01	5.85
2075-05-10	16.78	27.66	13.73	20.11	7.722	11.03	11.75	6.8	5.582
2075-05-11	16.55	26.72	13.75	20.95	7.136	10.79	12.62	6.788	5.58
2075-05-12	16.21	25.95	13.91	23.17	6.378	10.52	13.96	6.446	5.406
2075-05-13	15.97	25.09	13.9	24.56	5.981	9.966	14.41	6.452	5.666
2075-05-14	15.49	24.43	13.45	25.85	5.721	9.209	15.75	6.456	5.869
2075-05-15	15.09	23.66	12.98	25.92	5.507	8.614	15.79	6.292	6.187
2075-05-16	14.6	22.74	12.55	34.2	5.127	8.573	15.63	5.955	7.876
2075-05-17	14.1	21.79	12.06	41.61	4.704	8.472	15.35	5.506	8.328
2075-05-18	13.78	21.11	11.85	40.25	4.469	8.333	15.32	5.163	7.891
2075-05-19	13.36	20.3	11.57	36.6	4.246	8.243	14.79	5.171	7.39
2075-05-20	12.8	19.17	11.04	33.08	4.436	7.937	13.88	4.93	7.351
2075-05-21	12.18	18.36	10.6	29.86	4.488	7.447	13.24	5.244	7.301
2075-05-22	11.73	17.61	10.21	26.95	4.77	6.799	12.49	5.501	6.991
2075-05-23	11.46	16.78	10.01	25	5.02	6.421	11.89	5.389	6.551
2075-05-24	11.03	16.47	9.948	23.98	5.157	6.171	11.79	5.282	6.289
2075-05-25	10.93	15.83	9.891	22.6	5.306	6.293	11.96	5.131	6.018
2075-05-26	10.94	15.77	9.679	21.26	5.218	6.588	11.82	4.903	7.84
2075-05-27	10.72	15.78	9.154	19.84	5.002	6.889	11.65	4.94	10.58
2075-05-28	10.37	15.48	8.544	19.76	4.71	7.076	11.32	4.867	11.27
2075-05-29	10.27	15.64	12.58	19.5	4.292	7.057	11.04	4.852	12.35
2075-05-30	10.26	15.7	13.45	18.9	3.458	6.898	10.87	4.981	12.05
2075-05-31	10.31	15.64	13.1	18.51	3.091	6.688	10.33	4.905	11.5
2075-06-01	10.41	15.46	13.15	18.25	3.262	6.095	9.888	4.812	11.07
2075-06-02	10.43	15.06	13.19	18.02	3.409	5.526	9.566	4.59	10.36
2075-06-03	10.31	14.61	12.6	17.44	3.442	5.443	9.252	4.129	11.21
2075-06-04	9.981	14.38	11.71	17.01	3.341	5.454	9.219	3.702	12.29
2075-06-05	9.421	13.84	11.04	16.96	3.084	5.5	9.21	3.469	13.13
2075-06-06	8.864	13.58	10.24	16.79	3.052	5.494	9.346	3.005	13.3
2075-06-07	8.543	12.89	9.354	16.39	2.978	5.413	9.296	2.55	12.65
2075-06-08	10.65	12.41	8.605	16.47	2.758	5.224	9.136	2.544	11.51
2075-06-09	11.02	12.02	7.92	16.26	2.575	5.229	9.085	2.577	10.83
2075-06-10	10.12	11.38	7.239	15.63	2.52	5.467	8.843	2.958	9.855
2075-06-11	9.215	11.07	6.768	14.74	2.456	5.729	8.473	2.964	8.917
2075-06-12	8.581	10.97	6.3	14.49	2.514	6.358	7.884	2.999	12.75
2075-06-13	7.914	11.07	6.073	14.11	2.468	7.579	8.753	3.007	12.88
2075-06-14	7.348	11.51	5.753	13.89	2.734	13.05	12.32	2.921	10.72
2075-06-15	6.697	11.27	5.514	13.67	2.864	14.98	14.17	3.049	9.381
2075-06-16	5.967	10.98	5.31	13.28	2.954	14.4	14.59	3.112	8.615
2075-06-17	5.698	10.8	5.069	12.87	2.982	14.25	14.71	3.19	8.137
2075-06-18	5.46	10.55	4.948	12.56	2.935	14.03	14.52	3.178	7.791
2075-06-19	5.432	9.847	4.791	11.92	2.815	13.6	14.57	3.161	7.567
2075-06-20	5.445	9.454	4.663	11.21	2.64	12.72	13.82	3.085	7.439
2075-06-21	5.462	8.851	4.568	11.26	2.327	12.14	12.68	3	7.478
2075-06-22	5.43	8.652	4.906	11.27	2.036	11.35	11.55	2.91	7.422
2075-06-23	5.411	8.712	5.28	11.07	1.891	10.78	11.19	2.799	7.403
2075-06-24	5.275	8.8	5.445	10.63	1.96	10.67	10.49	2.806	7.333
2075-06-25	5.362	8.776	5.323	10.32	2.237	10.75	9.641	2.705	7.17
2075-06-26	5.452	8.792	5.176	10.22	2.348	10.58	9.194	2.669	7.109
2075-06-27	5.445	8.482	5.003	9.907	2.416	10.64	9.267	2.52	7.069
2075-06-28	5.074	7.555	4.739	9.69	2.413	10.4	9.504	2.491	6.889
2075-06-29	4.132	6.811	4.475	9.386	2.287	9.748	9.479	2.409	6.769
2075-06-30	3.663	6.59	4.017	9.185	2.046	8.907	9.153	2.283	6.665
2075-07-01	3.611	6.529	3.798	9.146	1.992	13.06	8.553	2.203	6.668
2075-07-02	3.673	6.492	3.722	8.959	1.808	13.33	7.817	2.037	6.617
2075-07-03	3.682	6.467	3.657	8.493	1.622	11.76	6.76	1.76	6.414
2075-07-04	3.566	6.332	3.627	8.19	1.387	11.34	6.077	1.725	6.123
2075-07-05	3.406	5.771	3.489	8.178	1.309	13.59	5.652	1.647	6.112
2075-07-06	3.031	5.304	3.539	8.239	1.315	19.74	5.403	1.455	6.137
2075-07-07	2.911	5.007	3.991	14.54	1.345	22.22	5.024	1.386	6.124
2075-07-08	2.904	5.016	4.109	15.45	1.243	22.64	4.891	1.433	6.064
2075-07-09	2.908	5.069	4.189	13.11	0.9918	22.96	4.599	1.44	5.969
2075-07-10	2.949	5.136	4.209	10.62	0.8786	23.12	4.568	1.323	5.754
2075-07-11	2.986	5.23	4.083	9.153	0.9662	22.78	4.308	1.32	5.481
2075-07-12	2.892	5.225	4.011	8.348	0.9361	22.26	3.837	1.356	5.494
2075-07-13	2.703	5.264	3.825	7.599	0.9425	20.76	3.824	1.53	5.474
2075-07-14	2.56	5.656	3.613	7.317	1.02	18.92	3.851	1.583	5.416
2075-07-15	2.562	5.924	3.323	7.089	1.064	17.22	3.93	1.635	5.35
2075-07-16	2.644	6.026	2.981	6.732	1.018	15.58	4.098	1.642	5.105
2075-07-17	2.689	5.977	2.911	7.321	0.9538	14.44	4.176	1.62	4.994
2075-07-18	2.664	5.811	2.805	7.201	0.9197	13.24	4.254	1.491	4.828
2075-07-19	2.657	5.615	2.664	6.697	0.9842	12.2	4.177	1.472	4.673
2075-07-20	2.596	5.356	2.386	6.213	1.036	12.89	3.715	1.645	4.772
2075-07-21	2.396	5.241	2.403	5.981	1.084	12.84	3.47	1.682	4.793
2075-07-22	2.28	5.312	2.296	5.784	1.049	12.87	3.549	7.379	4.754
2075-07-23	4.64	5.345	2.042	5.515	0.9444	15.53	3.646	11.63	4.727
2075-07-24	6.708	5.63	2.118	5.452	0.6939	17.25	3.592	12.66	4.318
2075-07-25	6.968	5.718	2.174	5.442	0.5399	16.55	3.662	13.66	4.198
2075-07-26	6.653	5.702	2.153	5.278	0.3872	15.65	3.683	14.7	4.22
2075-07-27	6.48	5.621	2.045	4.796	0.3489	14.52	3.522	15.33	4.45
2075-07-28	6.227	5.543	1.98	4.356	0.353	14.24	3.221	14.76	4.524
2075-07-29	5.775	5.253	1.894	4.37	0.3102	12.84	2.991	13.78	4.55
2075-07-30	5.164	4.696	1.982	5.463	0.2633	11.63	2.909	12.18	4.496
2075-07-31	4.461	4.091	2.122	5.884	0.4557	10.28	2.685	11.09	4.387
2075-08-01	3.873	3.857	2.267	6.458	0.5817	8.658	2.792	9.862	4.341
2075-08-02	3.591	3.847	3.15	6.556	0.7629	6.889	2.871	8.577	4.29
2075-08-03	4.022	3.835	3.923	6.329	0.8828	6.205	2.859	9.93	4.033
2075-08-04	4.153	3.854	4.407	6.189	0.9893	5.762	3.76	9.581	3.549
2075-08-05	5.238	3.649	4.945	6.111	1.159	5.265	3.677	7.693	3.514
2075-08-06	5.51	3.73	5.623	5.879	1.269	4.927	3.447	6.029	3.581
2075-08-07	4.814	3.764	8.182	5.668	1.191	4.882	3.347	4.994	3.501
2075-08-08	4.103	3.715	10.43	7.773	1.319	4.725	3.22	4.291	3.228
2075-08-09	3.736	3.62	10.62	8.039	1.351	4.487	3.136	3.966	3.15
2075-08-10	3.525	3.496	10.53	7.237	1.346	4.132	3.06	3.658	3.045
2075-08-11	3.496	3.499	10.13	6.561	1.257	3.906	2.781	3.384	2.771
2075-08-12	3.572	3.57	9.398	6.024	1.19	3.483	2.479	3.441	2.749
2075-08-13	3.555	3.548	9.078	5.812	1.082	3.324	2.355	3.34	2.91
2075-08-14	3.537	3.404	8.448	5.495	1.032	3.029	2.437	3.055	3.026
2075-08-15	3.449	3.231	7.662	5.181	0.9925	2.985	2.541	2.731	2.948
2075-08-16	3.25	2.956	7.018	4.888	1.133	2.909	2.624	2.44	2.885
2075-08-17	3.099	2.942	6.434	4.755	1.249	2.934	2.652	2.282	2.901
2075-08-18	2.988	2.981	5.909	4.684	1.319	3.074	2.567	2.078	2.778
2075-08-19	2.865	3.011	5.393	6.91	1.349	3.127	2.431	1.974	5.817
2075-08-20	3.335	2.994	5.971	9.108	1.326	3.178	2.209	2.015	6.562
2075-08-21	3.427	2.758	5.74	8.508	1.221	3.32	2.127	2.424	5.619
2075-08-22	3.98	2.471	11.87	8.303	1.15	3.453	2.3	2.81	5.273
2075-08-23	5.315	2.505	18.17	7.447	1.085	3.552	2.286	2.956	4.986
2075-08-24	4.984	2.598	17.36	6.316	0.9531	3.548	2.165	2.867	4.619
2075-08-25	3.891	2.635	13.88	5.537	0.8087	3.572	2.21	2.675	4.275
2075-08-26	3.314	2.62	11.25	5.323	0.7962	3.547	2.218	2.402	3.945
2075-08-27	2.974	2.493	9.424	5.049	0.86	4.1	2.192	2.023	3.676
2075-08-28	2.641	2.429	8.068	5.034	1.003	4.714	2.762	1.738	3.459
2075-08-29	5.54	2.319	6.965	4.83	1.036	4.875	2.904	1.693	3.305
2075-08-30	7.46	2.28	6.005	4.415	0.9114	5.18	2.805	1.712	3.206
2075-08-31	9.467	2.308	5.282	4.13	0.8735	5.15	2.759	1.569	3.069
2075-09-01	9.243	2.385	4.717	3.877	0.8673	4.73	2.736	1.251	2.857
2075-09-02	7.902	3.049	4.459	4.735	0.8278	4.197	2.814	1.164	2.743
2075-09-03	8.843	3.467	4.43	6.033	0.8596	3.533	2.919	1.072	2.826
2075-09-04	8.967	3.781	4.677	6.168	0.9098	2.734	2.878	2.437	3.015
2075-09-05	8.727	3.999	5.118	5.735	0.9461	2.005	2.838	2.808	3.179
2075-09-06	8.094	4.087	5.558	5.762	0.9186	1.78	2.757	2.574	3.328
2075-09-07	7.378	4.025	5.801	5.589	0.8961	1.818	2.649	2.442	3.405
2075-09-08	6.78	3.874	5.763	5.144	0.8632	1.875	2.501	2.346	3.419
2075-09-09	6.162	3.659	5.544	4.702	0.7685	1.959	3.583	2.234	3.375
2075-09-10	5.509	3.488	5.184	4.221	1.409	2.01	4.331	3.818	3.361
2075-09-11	4.876	3.305	4.775	3.561	1.621	2.033	4.265	5.486	3.613
2075-09-12	4.281	3.132	4.376	3.306	1.638	2.065	4.111	6.171	3.684
2075-09-13	3.811	3.473	4.011	3.361	1.662	2.045	3.973	6.248	3.824
2075-09-14	3.508	3.655	3.701	3.506	1.677	2.025	3.742	5.969	3.837
2075-09-15	3.269	3.888	3.533	3.568	1.54	1.882	3.5	5.516	3.785
2075-09-16	3.126	4.505	3.323	3.499	1.275	1.635	3.269	4.882	3.755
2075-09-17	2.976	5.492	3.157	3.399	1.105	1.625	3.071	4.466	3.647
2075-09-18	2.837	6.539	2.971	3.198	1.002	1.7	2.887	7.35	3.735
2075-09-19	2.791	7.259	2.873	3.061	0.9299	1.701	2.717	10.1	3.767
2075-09-20	2.678	7.505	2.779	2.98	1.263	1.857	2.588	10.61	3.799
2075-09-21	2.57	7.311	2.59	2.995	1.306	2.253	2.44	10.22	3.736
2075-09-22	2.441	6.851	2.406	2.954	2.287	3.579	2.221	9.763	3.61
2075-09-23	2.333	6.383	2.113	2.818	3.438	4.151	1.975	8.914	3.4
2075-09-24	2.301	5.854	1.971	2.641	4.609	4.021	1.981	9.639	3.686
2075-09-25	2.167	5.38	1.995	2.55	5.76	3.783	1.988	14.34	3.731
2075-09-26	2.047	4.952	2.019	2.504	6.869	3.49	2.032	15.87	3.473
2075-09-27	1.967	4.576	2.043	2.53	7.347	3.167	2.041	15.83	3.785
2075-09-28	1.894	4.255	2.248	2.571	7.304	2.901	2.07	14.43	3.82
2075-09-29	1.88	3.981	2.519	2.636	7.327	2.666	2.08	12.44	3.57
2075-09-30	1.886	3.813	2.686	2.746	7.631	2.448	2.127	10.84	3.363
2075-10-01	1.94	3.684	2.672	2.755	7.545	2.321	2.151	9.337	3.164
2075-10-02	2	4.646	2.523	3.813	7.419	2.148	2.173	7.955	2.898
2075-10-03	2.75	5.004	2.375	4.153	7.408	2.143	2.158	6.816	2.633
2075-10-04	2.837	4.743	2.822	3.889	7.332	2.221	2.166	5.916	2.464
2075-10-05	2.456	6.835	3.443	3.568	7.722	2.307	2.153	5.177	2.42
2075-10-06	2.352	7.367	4.188	3.359	7.578	2.406	2.176	4.525	2.339
2075-10-07	2.279	6.645	4.714	3.188	7.047	2.424	2.18	4.027	2.291
2075-10-08	2.153	5.81	4.832	3.082	6.451	2.362	2.157	3.567	2.245
2075-10-09	2.02	5.15	4.583	2.946	5.854	2.253	2.101	3.237	2.198
2075-10-10	1.892	4.608	4.163	2.832	5.214	2.198	2.028	3.022	2.167
2075-10-11	1.813	4.141	3.7	2.69	4.673	2.212	2.178	2.834	2.145
2075-10-12	1.775	3.749	3.281	2.885	4.208	2.274	4.692	2.671	2.157
2075-10-13	2.735	3.409	28.13	2.85	3.787	2.374	9.378	2.598	2.16
2075-10-14	3.667	3.114	35.08	2.759	3.442	2.446	16.81	2.546	2.129
2075-10-15	4.514	2.852	28.95	2.758	3.17	2.443	21.04	2.508	2.078
2075-10-16	5.353	2.585	26.09	2.721	2.971	2.402	21.44	2.471	2.037
2075-10-17	6.652	2.375	28.22	2.698	2.829	2.323	19.91	2.438	2.065
2075-10-18	7.268	2.295	28.47	2.705	2.67	2.235	18.18	2.402	2.098
2075-10-19	7.179	2.243	26.92	2.662	2.527	2.163	15.34	2.363	4.167
2075-10-20	6.655	2.139	25.18	2.627	2.412	2.087	12.22	2.345	4.834
2075-10-21	6.969	3.258	22.74	3.408	2.332	2.006	9.728	2.297	4.471
2075-10-22	6.985	8.551	79.03	4.095	2.279	1.979	7.906	3.038	4.022
2075-10-23	6.634	12.05	97.86	4.254	2.226	1.996	6.562	3.119	3.67
2075-10-24	6.332	13.86	87.68	4.181	2.17	2.02	5.557	3.022	5.329
2075-10-25	6.027	14.89	74.93	5.111	2.67	2.061	10.41	3.027	6.73
2075-10-26	6.945	20.12	64.88	4.964	2.988	2.069	11.74	3.41	7.605
2075-10-27	7.647	21.94	56.24	4.113	4.604	2.054	10.4	3.978	8.023
2075-10-28	8.129	20.92	48.22	3.452	5.739	2.023	9.259	4.428	7.836
2075-10-29	9.421	19.37	41.07	3.078	6.386	1.97	8.698	4.623	7.128
2075-10-30	11.5	17.68	34.97	2.848	6.713	1.933	8.836	4.577	6.215
2075-10-31	12.28	15.6	30	2.651	8.145	1.924	8.957	4.379	5.337
2075-11-01	13.45	14.01	26.05	2.5	8.625	1.913	8.818	4.147	4.617
2075-11-02	13.75	16.2	22.78	2.417	8.559	1.931	8.542	3.908	4.065
2075-11-03	14.17	16.63	20.2	2.377	8.191	1.952	8.159	3.674	3.634
2075-11-04	13.68	21.82	18.18	2.335	7.637	1.93	13.24	3.717	3.287
2075-11-05	12.69	23.08	16.67	2.316	6.969	1.894	13.87	3.684	2.998
2075-11-06	16.01	21.31	15.55	2.294	6.23	1.845	12.29	3.508	2.757
2075-11-07	17.78	19.64	14.65	2.283	5.496	1.794	10.76	3.523	2.577
2075-11-08	18.07	19.68	13.94	2.288	4.828	2.125	10.01	6.563	2.436
2075-11-09	18.07	20.03	13.43	2.304	4.246	2.467	9.205	9.528	2.363
2075-11-10	19.67	28.35	12.99	2.32	3.776	2.754	8.321	11.07	2.324
2075-11-11	26.09	33.62	13.27	2.321	4.978	3.514	8.685	12.31	2.318
2075-11-12	31.93	35.04	13.54	2.291	12.1	4.174	10.38	13.25	2.316
2075-11-13	33.89	35.32	13.55	2.24	16.79	4.595	11.32	13.57	2.311
2075-11-14	34.03	34.53	13.37	2.158	19.06	4.805	11.62	13.2	2.307
2075-11-15	32.77	32.86	13.16	2.154	21.15	8.424	11.79	12.36	2.294
2075-11-16	30.1	29.96	13.12	2.178	26.92	10.56	13.59	11.3	4.66
2075-11-17	26.47	26.5	16.32	2.218	29.08	10.94	14.03	10.24	5.942
2075-11-18	22.61	23.2	17.08	2.283	28.41	10.95	13.51	9.352	6.389
2075-11-19	19.14	20.36	16.18	2.348	26.95	10.75	12.94	8.61	6.601
2075-11-20	16.2	18.51	16.47	2.59	24.96	10.93	12.34	7.984	6.523
2075-11-21	13.87	16.8	16.29	3.098	24.3	10.62	11.59	7.472	6.138
2075-11-22	12.14	15.2	15.58	3.254	23.13	10.25	10.69	7.067	5.551
2075-11-23	12.59	14.39	14.87	3.406	20.73	9.828	9.741	6.759	4.969
2075-11-24	13.27	13.83	14.26	3.639	18.15	9.508	8.793	6.51	4.459
2075-11-25	14.23	13.13	13.87	3.72	16.63	9.864	7.933	6.305	4.466
2075-11-26	14.51	12.47	13.48	3.713	17.9	10.12	7.202	6.113	4.391
2075-11-27	14.29	11.94	15.21	3.743	17.31	10.45	6.597	6.59	4.436
2075-11-28	13.82	11.42	16.95	3.682	16.36	14.21	6.162	7.579	4.555
2075-11-29	13.07	10.87	21.86	4.21	16.84	16.41	5.792	10.42	4.987
2075-11-30	12.13	10.33	24.84	4.778	17.51	16.86	5.502	12.57	5.303
2075-12-01	11.14	9.838	26.05	6.565	18.43	16.71	5.274	14.16	5.453
2075-12-02	10.17	9.448	27.14	7.478	18.74	19.46	8.651	15.33	5.492
2075-12-03	9.308	9.068	27.35	7.732	18.36	21.51	21.23	15.64	5.383
2075-12-04	8.573	8.741	26.82	7.994	17.45	21.77	27.37	15.17	5.104
2075-12-05	7.955	8.464	25.92	8.344	21.06	24.73	29.48	14.53	5.186
2075-12-06	7.448	8.211	24.84	8.515	24.17	25.93	30.8	13.94	9.451
2075-12-07	7.036	7.957	23.72	8.182	24.43	26.11	30.73	13.19	11.44
2075-12-08	6.696	7.703	22.66	7.638	23.42	26.3	28.89	12.61	11.89
2075-12-09	6.428	7.448	21.64	9.047	21.95	26.89	25.86	12.24	12.27
2075-12-10	6.203	7.21	20.74	9.499	20.8	26.55	22.47	11.98	12.44
2075-12-11	6.008	6.983	19.93	9.29	20.51	25.66	19.3	11.67	12.16
2075-12-12	5.829	6.763	19.24	9.163	19.39	24.67	16.61	11.27	11.43
2075-12-13	5.671	6.553	18.63	9.117	17.71	23.69	14.42	10.83	10.45
2075-12-14	5.529	6.364	18.1	9.146	16.17	22.84	12.75	10.39	9.453
2075-12-15	5.392	6.176	17.63	9.264	14.84	21.93	11.45	9.955	8.518
2075-12-16	5.255	5.987	17.23	9.333	13.63	21.03	10.44	9.559	7.688
2075-12-17	5.139	5.826	16.92	9.196	12.56	20.23	9.646	9.206	6.995
2075-12-18	5.059	5.801	16.63	8.79	11.65	19.52	9.022	8.913	6.427
2075-12-19	5	5.733	16.35	8.192	10.89	18.89	8.519	8.658	5.971
2075-12-20	4.948	5.642	16.09	7.549	10.25	18.34	8.105	8.437	5.598
2075-12-21	4.891	5.54	15.8	6.951	9.706	17.98	7.762	8.237	5.289
2075-12-22	4.798	5.403	15.55	6.427	9.25	18.13	7.454	8.07	5.024
2075-12-23	4.696	5.25	15.29	5.983	8.859	18.4	7.161	7.916	4.803
2075-12-24	4.612	5.098	15.02	5.609	8.52	18.8	6.916	7.771	4.606
2075-12-25	4.527	6.122	14.76	5.301	8.22	19.38	6.692	7.635	4.448
2075-12-26	4.485	8.082	14.5	5.035	7.95	19.96	6.478	7.507	4.306
2075-12-27	5.335	9.969	14.25	4.815	7.7	24.95	25.81	7.379	4.196
2075-12-28	5.864	12.47	14	4.626	7.466	28.81	53.73	7.25	4.09
2075-12-29	6.772	19.23	13.76	4.466	7.256	29.82	67.55	7.131	3.978
2075-12-30	7.318	26.26	13.51	4.325	7.06	29.87	74.52	7.008	3.893
2075-12-31	7.635	31.85	13.29	4.203	6.896	29.56	88.34	6.881	3.831
2076-01-01	8.51	36.1	13.05	4.091	7.22	28.88	93.12	8.063	3.794
2076-01-02	8.874	36.74	12.82	3.989	7.24	28	88.12	15.18	11.7
2076-01-03	8.786	34.35	12.59	3.89	7.068	27.77	78.27	22.75	24.04
2076-01-04	8.598	30.85	12.36	3.805	6.836	27.73	66.75	27.52	31.67
2076-01-05	8.674	27.83	12.13	3.716	6.591	27.25	55.41	30.37	35.97
2076-01-06	8.618	25.46	11.9	3.629	6.343	26.73	45.37	32.09	37.89
2076-01-07	8.425	23.39	11.66	3.551	6.115	26.38	40.35	32.31	36.79
2076-01-08	8.594	21.72	11.44	3.482	5.936	26.04	37.55	30.93	33.05
2076-01-09	8.646	20.46	11.21	3.404	6.402	25.56	43.11	28.36	28.06
2076-01-10	8.62	19.55	10.98	4.512	6.99	25.01	56.11	25.34	23.1
2076-01-11	8.556	18.72	12.84	10.68	7.488	24.38	66.5	22.4	22.44
2076-01-12	10.72	18.54	14.5	16.55	7.877	23.75	76.64	19.9	23.01
2076-01-13	11.56	19.45	20.75	27.19	8.088	23.11	90.47	17.9	23.72
2076-01-14	11.83	19.99	24.28	35.72	10.7	22.5	99.44	16.35	24.17
2076-01-15	11.94	21.54	26.85	42.58	12	21.92	101.6	15.19	24.14
2076-01-16	12.65	25.86	34.49	49.85	13.33	21.39	98.78	14.25	23.39
2076-01-17	12.87	28.62	39.1	55.57	16.91	20.92	92.93	13.49	21.88
2076-01-18	17.29	32.74	40.66	58.18	18.72	20.46	85.42	12.89	19.88
2076-01-19	18.27	35.32	40.57	58.16	19.59	20.03	85.98	12.4	17.72
2076-01-20	17.13	36.38	38.92	55.83	20.34	19.58	82.27	12.01	15.62
2076-01-21	17.09	36.38	35.84	51.5	27.55	19.18	76.4	11.81	15.19
2076-01-22	17.3	35.55	31.98	46.07	31.58	19.33	81.6	17.54	19.78
2076-01-23	17.36	34.14	27.96	40.36	32.95	19.9	83.41	20.34	23.57
2076-01-24	17.35	32.51	24.36	35	37.08	20.88	81.92	20.68	26.39
2076-01-25	17.49	30.91	21.35	30.36	38.85	22.37	80.12	20.62	28.33
2076-01-26	21.78	29.68	18.91	26.52	38.72	24.07	77.76	20.18	28.65
2076-01-27	28.09	29.65	16.97	23.41	37.75	25.53	74.19	19.21	27.18
2076-01-28	31.54	28.79	15.39	20.95	36.35	26.18	73.7	17.94	24.57
2076-01-29	33.84	27.42	14.17	19	34.55	26.8	71	16.67	21.6
2076-01-30	35.83	26.21	13.18	17.45	32.4	26.6	67.19	15.52	18.76
2076-01-31	36.74	27.46	12.34	16.17	29.99	26.64	63.99	14.57	16.34
2076-02-01	36.11	27.85	11.59	15.07	27.6	26.61	61.27	13.83	14.39
2076-02-02	34.39	27.61	10.93	14.15	25.4	27.52	58.64	13.18	12.84
2076-02-03	32.1	27.43	10.38	13.41	23.46	28.11	55.99	12.66	11.63
2076-02-04	29.75	27.18	9.89	12.76	21.86	28.37	53.17	12.23	10.67
2076-02-05	27.62	26.69	9.428	12.21	20.51	29.95	50.45	11.86	9.872
2076-02-06	25.67	26.33	9.035	11.71	19.37	30.42	47.9	11.57	9.207
2076-02-07	24.9	27.52	8.707	11.28	18.48	30.1	45.71	11.29	8.63
2076-02-08	24.79	27.65	8.406	10.88	17.71	30.5	43.69	11.04	8.132
2076-02-09	30.65	27.09	8.133	10.5	17.05	33.95	41.95	10.79	7.718
2076-02-10	33.4	26.52	7.882	10.14	16.47	35.76	40.42	10.57	7.346
2076-02-11	33.95	27.86	7.603	9.799	15.88	35.73	39.04	10.35	7.017
2076-02-12	33.88	28.13	7.368	9.491	15.41	35.53	37.8	10.14	15.68
2076-02-13	33.43	27.52	7.13	9.195	14.97	35.57	36.63	9.961	29.5
2076-02-14	35.9	26.83	6.934	8.939	14.52	35.55	35.52	9.767	44.39
2076-02-15	37.92	26.98	6.785	8.943	14.12	35.09	34.48	9.578	54.55
2076-02-16	39.85	27.03	6.701	9.435	13.74	34.55	35.72	9.399	58.32
2076-02-17	40.56	26.65	14.8	13.18	13.39	33.87	43.26	9.225	57.9
2076-02-18	40.77	26.05	12.67	26.28	13.04	33.04	46.52	9.064	54.93
2076-02-19	40.79	25.44	9.521	39.46	12.71	32.01	46.98	8.867	50.71
2076-02-20	40.38	24.8	22.76	50.93	12.39	31.02	47.08	8.694	46.53
2076-02-21	39.41	24.18	43.63	54.97	12.08	30.12	46.72	8.518	42.96
2076-02-22	37.84	23.52	66.4	54.48	11.76	29.34	45.41	8.344	40.05
2076-02-23	35.96	22.9	83.38	53.2	11.46	28.67	43.5	8.176	37.53
2076-02-24	34.04	22.32	96.45	52.04	11.13	27.97	41.32	7.995	34.99
2076-02-25	32.26	21.74	101.3	50.55	10.97	29.46	39.04	7.833	32.37
2076-02-26	30.7	21.2	98.32	48.43	10.91	35.72	37.09	7.701	30.93
2076-02-27	29.39	20.62	91.14	45.65	11.3	37.3	35.24	7.559	29.45
2076-02-28	28.22	26.83	82.82	42.52	12.11	36.28	33.36	7.406	28.25
2076-02-29	27.62	41.68	74.97	39.39	12.87	35.38	31.63	7.255	27.9
2076-03-01	29.12	50.66	68.41	36.53	13.1	35.75	30.04	7.092	28.17
2076-03-02	31.13	55.63	62.98	34.02	12.73	35.29	28.63	6.937	28.49
2076-03-03	33.32	59.67	58.19	31.82	12	34.39	27.44	6.788	31.66
2076-03-04	35.46	61.69	53.85	29.9	11.17	33.57	26.59	6.659	32.61
2076-03-05	37.44	60.59	49.91	28.19	10.67	32.86	25.55	6.512	32.14
2076-03-06	38.53	56.71	46.39	26.65	13.12	32.25	24.7	6.361	31.47
2076-03-07	38.22	51.45	46.27	25.49	22.52	31.54	24.04	6.232	30.77
2076-03-08	36.84	46.1	45.53	25.71	35.21	30.72	23.51	6.095	29.93
2076-03-09	34.85	41.47	44.31	25.01	48.17	29.69	23.16	5.952	28.95
2076-03-10	32.81	37.57	47.04	25.63	60.56	28.7	22.57	5.821	27.85
2076-03-11	31.15	34.39	47.55	25.55	70.96	28.9	21.95	5.689	26.61
2076-03-12	29.91	31.97	46.35	25.1	76.35	28.59	21.51	5.568	25.3
2076-03-13	29.17	29.96	45.17	24.87	80.3	28.33	29.33	7.526	25.51
2076-03-14	28.49	28.26	44.55	27.02	78.8	27.84	31.04	8.921	25.27
2076-03-15	27.6	26.8	49.5	28.06	73.01	27.15	28.84	9.311	24.9
2076-03-16	27.07	26.18	62.09	29.04	65.99	26.79	26.74	17.7	26.79
2076-03-17	26.49	25.51	67.75	29.91	59	26.58	29.82	48.69	27.42
2076-03-18	25.68	24.81	70.58	31.29	52.12	27.09	30.76	117.8	28.19
2076-03-19	24.95	24.21	75.19	32.1	48.54	27.47	30.49	175.8	30.01
2076-03-20	24.34	23.66	79.51	32.02	46.42	27.81	32.69	211.9	30.97
2076-03-21	23.75	23.24	84.49	36.37	45.1	28.37	35.76	236.8	31.7
2076-03-22	34.06	22.73	87.91	38.5	42.69	28.62	37.19	249.8	32.19
2076-03-23	38.25	22.14	90.4	39.06	40.04	28.61	37.39	247.9	32.26
2076-03-24	38.19	21.37	91.47	39.62	44.47	28.53	36.96	233.4	31.64
2076-03-25	38.48	20.53	91.02	39.89	45.76	28.13	37.23	211.7	30.5
2076-03-26	42.16	19.73	89.26	39.55	43.87	27.5	36.86	188.3	29.69
2076-03-27	42.97	19.3	86.34	38.35	42.05	26.53	35.69	166.7	28.47
2076-03-28	41.74	18.48	82.66	36.7	40.92	26.69	33.65	147.5	27.05
2076-03-29	48.02	20	78.55	34.7	39.86	27.93	31.38	131.3	25.95
2076-03-30	51.39	24.56	74.49	32.78	38.41	33.78	29.31	116.8	25.02
2076-03-31	51.05	25.59	70.84	31.03	36.39	33.87	27.9	104.5	24.3
2076-04-01	50.4	24.87	68.91	29.52	34.2	31.12	26.22	93.74	23.6
2076-04-02	50.12	24.3	66.82	28.2	32	28.71	25.01	84.41	22.76
2076-04-03	49.53	23.78	64.41	27.17	30.21	26.97	25.02	76.5	21.78
2076-04-04	48.3	23.03	63.94	26.31	28.64	25.63	26.08	69.92	20.82
2076-04-05	46.42	22.14	63.38	25.44	28.12	24.32	25.23	64.26	20.04
2076-04-06	44.36	21.02	61.6	25.52	32.72	23.04	23.75	59.46	19.37
2076-04-07	42.19	19.87	59.66	25.59	34.93	22.07	26	55.45	18.89
2076-04-08	39.78	18.68	58.06	25.53	35.4	21.31	26.39	52.39	18.82
2076-04-09	37.64	17.71	56.33	27.66	35.66	20.66	25.11	49.52	18.51
2076-04-10	35.81	17.1	56.35	29.59	36.01	19.96	24.81	46.9	17.98
2076-04-11	34.53	16.55	55.64	29.89	35.97	19.27	24.76	44.28	17.67
2076-04-12	33.29	16.08	54.56	29.51	35.32	18.59	24.85	41.85	17.31
2076-04-13	32.17	15.63	53.45	28.86	34.42	18.26	25.04	39.67	16.9
2076-04-14	31.38	15.3	53.43	27.91	32.86	17.79	25.29	37.72	16.62
2076-04-15	30.62	14.97	52.86	27.93	30.93	17.36	25.13	35.92	16.23
2076-04-16	29.91	14.57	51.39	26.54	29.03	16.76	24.68	34.21	15.79
2076-04-17	29.19	14.17	50.17	25.27	27.52	16.14	24.23	32.73	15.39
2076-04-18	28.61	13.75	49.29	24.95	26.09	15.84	23.49	31.18	14.92
2076-04-19	28.24	13.45	47.74	23.65	24.92	15.6	22.55	29.6	14.34
2076-04-20	27.92	13.36	45.66	22.45	24.2	15.16	21.72	28.71	14.12
2076-04-21	27.49	13.2	43.83	21.94	23.59	14.75	20.93	27.89	13.88
2076-04-22	27.3	13.38	43.03	21.36	23.38	14.14	20.19	27.01	13.62
2076-04-23	27.15	13.77	41.99	20.83	22.99	13.73	19.4	26.09	13.4
2076-04-24	26.51	13.93	40.99	20.34	22.44	14.33	18.61	25.34	13.87
2076-04-25	25.92	13.73	39.76	20.77	21.91	14.46	18.72	24.89	14.03
2076-04-26	25.58	14.56	38.41	20.2	21.75	14.45	17.97	24.42	13.98
2076-04-27	24.98	14.49	37.86	19.82	21.52	15.11	17.72	23.83	13.98
2076-04-28	24.2	13.53	37.16	19.57	20.61	15.19	17.2	23.04	14.03
2076-04-29	23.16	12.64	37.77	19.2	19.5	14.98	16.94	22.15	13.92
2076-04-30	22.15	13.16	37.21	19.03	18.46	15.44	16.72	21.45	13.7
2076-05-01	23.95	22.71	35.96	18.1	18	15.84	16.45	20.39	13.47
2076-05-02	25.13	32.75	35.51	17.33	17.43	15.83	15.95	19.19	13.11
2076-05-03	25.11	43.55	34.54	16.82	16.67	15.82	15.61	17.77	12.66
2076-05-04	25.81	51.39	33.71	17.57	16.47	16.14	15.29	16.99	12.26
2076-05-05	35.25	56.82	38.42	17.75	16.07	15.94	15.05	16.13	11.47
2076-05-06	39.74	59	44.31	17.63	15.6	15.72	14.88	15.84	11.2
2076-05-07	39.86	57.06	49.33	18.3	15.27	15.31	14.77	15.7	10.92
2076-05-08	37.95	52.36	52.76	18.81	14.83	14.7	14.33	15.25	10.59
2076-05-09	35.64	47.2	53.27	19.08	14.76	14.02	13.67	14.78	10.53
2076-05-10	33.02	41.84	50.65	18.7	14.23	13.34	13.2	14.94	10.69
2076-05-11	29.25	36.97	46.33	18.74	13.61	12.69	13.15	14.7	11.28
2076-05-12	26.15	32.69	41.64	17.97	13.46	12.04	13.32	14.06	13.82
2076-05-13	23.54	28.88	37.65	16.98	13.17	11.95	13.37	13.31	17.38
2076-05-14	21.58	25.9	34.33	16.4	12.71	11.59	13.2	12.72	22.3
2076-05-15	20.06	23.25	31.81	15.67	12.34	11.2	13	12.26	27.28
2076-05-16	18.49	21.15	30.09	14.69	12.05	11.21	12.51	11.94	31.51
2076-05-17	17.12	19.68	28.53	13.73	11.86	11.18	11.6	11.58	33.32
2076-05-18	16.51	18.46	27.12	13.22	11.53	10.73	11.34	11.42	32.93
2076-05-19	16.47	17.53	26.01	12.75	11.23	10.43	10.45	11.41	31.31
2076-05-20	16.2	17.65	24.96	12.35	11.49	10.18	9.638	11.01	29.1
2076-05-21	16.2	17.55	24.07	11.89	11.82	9.898	9.101	10.45	26.73
2076-05-22	15.88	17.38	23.49	11.48	11.89	9.815	8.925	9.861	24.72
2076-05-23	15.57	17.21	22.93	11.32	12.21	9.726	8.876	9.258	22.54
2076-05-24	15.23	16.89	22.33	11.25	12.18	9.553	8.961	8.811	21.46
2076-05-25	14.95	16.52	22.21	11.25	11.84	9.285	9.048	8.429	20.27
2076-05-26	14.6	16.18	22.44	11.35	11.29	9.149	8.967	8.514	18.83
2076-05-27	14.17	16.02	21.82	11.38	11.21	9.04	8.896	8.491	17.26
2076-05-28	13.59	15.88	21.27	11.1	11.09	8.733	8.915	8.393	16.52
2076-05-29	12.99	15.6	20.86	11.33	10.74	8.628	8.82	8.055	16.68
2076-05-30	12.5	15.15	20.57	15.73	10.26	8.397	8.565	7.649	16.29
2076-05-31	12	14.58	20.14	16.73	9.621	7.98	8.253	7.286	17.21
2076-06-01	11.71	14.41	20.16	15.76	8.908	7.368	7.74	6.909	18.15
2076-06-02	11.41	14.28	19.92	47.01	8.511	6.986	7.167	6.907	18.98
2076-06-03	10.93	13.94	19.9	71.02	8.127	6.746	7.032	6.758	19.43
2076-06-04	13.22	13.53	19.72	74.64	7.945	6.764	9.173	6.72	19.22
2076-06-05	13.83	12.87	19.16	67.63	7.642	6.762	12.79	6.767	18.62
2076-06-06	13.37	12.13	18.48	60.22	7.609	6.682	21.18	6.663	17.97
2076-06-07	12.25	11.44	18.07	54.28	7.06	6.555	28.25	6.358	18.96
2076-06-08	11.43	11.01	17.7	49.16	6.956	6.027	31.73	6.145	19.53
2076-06-09	11.13	11.03	17.14	50.84	6.75	5.478	31.93	5.843	19.88
2076-06-10	10.9	11.13	16.81	57.84	6.375	5.082	28.59	5.808	19.66
2076-06-11	10.55	11.16	16.15	59.23	6.646	4.832	24.39	5.696	21.16
2076-06-12	9.951	10.99	16.13	55.07	6.715	4.806	20.42	5.981	31.99
2076-06-13	9.294	10.69	16.03	55.33	6.601	4.747	17.43	6.21	42
2076-06-14	8.647	10.16	16.07	54.17	6.531	4.732	15.06	6.189	51.2
2076-06-15	8.32	9.84	15.43	50.94	6.27	5.077	13.1	6.042	57.9
2076-06-16	8.388	9.739	14.72	47.23	5.579	5.633	11.85	5.98	59.69
2076-06-17	8.446	9.734	13.85	44.11	4.975	6.846	11.27	7.423	57.15
2076-06-18	8.508	9.731	13.56	41.9	4.642	8.729	10.83	11.23	51.85
2076-06-19	8.474	9.687	13.69	39.31	4.55	11.81	10.34	11.25	46.09
2076-06-20	8.316	9.294	13.74	37.04	4.4	15.02	9.83	9.172	40.88
2076-06-21	8.212	8.612	13.82	35.15	4.164	18.77	9.405	7.55	36.5
2076-06-22	8.045	8.072	13.84	33.51	4.013	20.32	9.139	6.653	32.61
2076-06-23	7.79	8.022	13.46	31.57	3.92	20.42	13.63	6.167	29.35
2076-06-24	7.42	7.952	12.62	29.6	3.871	18.95	15.54	5.978	32.56
2076-06-25	6.9	7.987	11.61	28.37	4.025	16.7	14.37	5.835	48.45
2076-06-26	6.523	7.979	11.57	27.47	4.102	15.53	12.85	5.357	56.2
2076-06-27	6.502	7.883	11.14	26.74	4.219	14.29	11.52	4.875	57.74
2076-06-28	6.436	7.539	11.01	26.44	5.652	13.04	10.72	4.272	59.45
2076-06-29	6.312	6.948	11.04	26.37	6.259	11.88	10.01	4.114	59.04
2076-06-30	6.1	6.509	11.73	26.75	6.21	11.33	9.426	3.74	56.23
2076-07-01	5.731	6.48	11.45	27.07	6.21	10.82	8.827	3.772	51
2076-07-02	5.658	6.251	11.01	26.98	6.217	10.01	8.236	3.971	45.95
2076-07-03	5.528	5.863	10.87	26.68	5.891	9.085	59.9	3.839	40.96
2076-07-04	5.433	5.619	10.81	26.78	5.449	8.255	65.98	3.889	37.18
2076-07-05	5.166	5.483	10.32	26.64	5.049	7.386	43.72	3.828	34.92
2076-07-06	4.884	5.231	10.07	25.44	4.679	6.496	25.97	3.99	33.2
2076-07-07	4.706	5.199	9.776	24.28	4.378	5.577	16.48	3.925	31.56
2076-07-08	4.773	5.046	9.892	23.87	4.118	4.777	16.7	4.013	30.27
2076-07-09	4.843	4.617	9.67	22.96	3.784	4.546	18.02	4.29	29.5
2076-07-10	4.961	4.607	9.69	21.8	3.53	4.453	19.09	4.357	28.69
2076-07-11	4.985	4.449	9.733	21.44	3.376	4.451	19.12	4.274	27.14
2076-07-12	4.868	4.034	9.703	21.62	3.168	4.405	18.05	4.025	25.33
2076-07-13	4.532	4.115	9.74	21.37	3.028	4.151	16.27	3.853	24.33
2076-07-14	4.239	4.207	9.77	23.42	9.134	3.707	13.93	3.635	23.74
2076-07-15	4.254	4.243	9.737	27.51	12.13	3.184	12.96	3.4	22.9
2076-07-16	4.273	4.123	9.531	27.16	11.19	2.993	11.82	2.931	21.99
2076-07-17	4.362	3.907	9.24	24.69	10.4	2.96	10.32	2.836	23.38
2076-07-18	4.341	3.719	8.807	22.64	9.718	2.753	8.656	2.925	23.3
2076-07-19	4.312	3.701	8.694	20.93	9.868	2.353	8.251	2.929	22.13
2076-07-20	4.436	3.835	8.652	19.25	9.716	2.41	8.237	2.965	21.09
2076-07-21	4.429	3.937	8.65	18.89	9.123	2.567	8.283	3.057	20.4
2076-07-22	4.631	4.078	8.615	18.94	8.119	2.752	8.422	3.039	19.71
2076-07-23	4.584	4.153	8.253	17.87	7.108	2.833	8.424	3.064	19.73
2076-07-24	4.433	4.082	7.976	16.91	6.822	2.831	8.217	3.02	19.49
2076-07-25	4.442	3.75	7.594	15.96	6.604	2.802	7.562	3.036	18.46
2076-07-26	4.404	3.319	7.329	14.89	6.772	2.751	6.851	3.046	18.21
2076-07-27	4.367	3.264	6.663	13.76	6.906	2.592	6.625	2.949	17.43
2076-07-28	4.388	3.237	5.945	13.08	10.86	2.402	6.488	2.726	16.53
2076-07-29	4.418	3.313	5.53	12.68	11.07	2.138	6.501	2.258	16.16
2076-07-30	4.312	3.353	5.791	12.45	9.284	2.105	6.456	2.226	16.1
2076-07-31	3.868	3.094	5.782	12.67	7.638	2.182	6.602	2.232	15.77
2076-08-01	3.592	2.824	6.012	12.61	11.35	2.26	6.578	2.363	15.16
2076-08-02	3.504	2.777	6.13	12.59	15.68	2.292	6.408	2.185	14.53
2076-08-03	3.615	2.969	6.182	12.43	15.82	2.252	6.412	1.908	13.81
2076-08-04	3.622	3.071	6.209	11.99	14.16	2.309	6.319	1.833	13.09
2076-08-05	3.614	3.084	6.134	11.58	12.03	2.229	6.148	1.798	12.85
2076-08-06	3.576	3.095	6.044	11.58	10.51	2.061	5.946	1.697	12.79
2076-08-07	3.525	3.054	5.926	11.33	8.635	1.895	5.746	1.629	12.68
2076-08-08	3.522	3.061	5.723	11.1	10.59	1.843	5.563	1.583	12.54
2076-08-09	3.592	3.167	5.402	11.03	10.54	1.731	5.278	1.637	12.28
2076-08-10	3.602	3.278	5.231	11.04	9.062	1.687	5.63	1.67	11.95
2076-08-11	3.622	3.388	5.239	11.01	7.868	1.682	5.948	1.734	11.86
2076-08-12	3.638	3.53	5.303	11.12	6.974	1.759	6.132	1.759	11.8
2076-08-13	3.589	3.518	5.305	11.13	8.5	1.753	6.208	1.733	11.77
2076-08-14	3.527	3.402	5.259	11.05	9.22	1.662	6.089	1.746	11.45
2076-08-15	3.391	7.141	5.28	10.4	9.273	1.464	5.883	1.693	11.05
2076-08-16	3.438	8.504	5.332	9.592	9.206	1.561	5.626	1.537	11
2076-08-17	3.601	8.067	5.408	9.384	8.758	1.71	5.422	1.506	10.88
2076-08-18	3.787	7.384	5.511	9.097	7.929	2.13	5.126	1.538	11.74
2076-08-19	4.015	6.75	5.582	8.805	6.742	2.666	4.68	1.539	11.66
2076-08-20	4.139	6.107	5.572	8.512	5.639	3.163	4.279	1.509	11.21
2076-08-21	4.173	8.107	5.469	8.189	5.078	3.407	4.055	1.443	10.92
2076-08-22	4.71	9.217	5.287	7.998	4.676	3.398	3.952	1.409	10.78
2076-08-23	6.782	9.15	5.074	7.833	4.245	3.165	5.167	1.183	10.25
2076-08-24	11.57	8.574	4.871	7.977	3.992	2.93	7.659	1.068	9.912
2076-08-25	22.7	13.13	4.768	7.964	3.788	2.809	12.27	1.575	9.629
2076-08-26	35.54	14.48	4.774	8.046	3.615	2.652	31.07	5.271	9.669
2076-08-27	43.34	12.97	4.856	8.146	3.293	3.53	58.97	6.515	9.77
2076-08-28	43.46	14.78	4.986	8.085	3.2	3.756	101	6.008	10.05
2076-08-29	38.42	20.68	5.148	8.1	3.093	3.524	118.5	5.339	10.28
2076-08-30	34.4	29.08	5.205	8.122	3.081	3.168	110.6	4.769	10.4
2076-08-31	33.46	28.35	5.206	8.159	3.106	2.751	92.82	4.235	10.44
2076-09-01	34.35	25.6	5.166	8.183	11.25	2.273	74.91	3.818	10.36
2076-09-02	39.21	22.35	5.04	8.207	14.42	1.882	60.18	3.437	10.18
2076-09-03	40.45	23.95	4.937	8.098	12.19	1.475	48.61	3.141	10.04
2076-09-04	37.95	23.7	4.79	7.771	10.02	1.427	41.77	2.843	9.919
2076-09-05	35.29	22.31	4.677	7.576	8.47	1.347	35.71	2.559	9.703
2076-09-06	31.17	21.32	4.568	7.292	7.256	1.51	29.89	2.297	9.379
2076-09-07	26.98	20.02	4.551	6.933	6.251	2.704	25.48	2.433	9.022
2076-09-08	23.48	19.94	16.14	7.455	5.399	3.621	22.45	2.346	8.739
2076-09-09	20.5	33.45	16.88	9.116	4.707	4.18	20	2.152	8.418
2076-09-10	18.39	39.72	11.69	12.36	4.227	4.413	18.58	2.021	8.227
2076-09-11	16.52	39.11	8.007	16.88	3.901	10.63	16.97	1.984	8.037
2076-09-12	14.84	38.19	6.266	20.99	3.555	11.66	15.81	1.916	7.9
2076-09-13	13.45	37.62	5.55	23.12	3.29	9.105	15.01	1.866	7.81
2076-09-14	12.27	36.5	5.141	23.1	2.871	6.968	14.31	1.801	7.809
2076-09-15	11.31	33.39	4.823	21.5	2.551	5.677	13.74	1.736	7.8
2076-09-16	10.52	29.32	4.523	19.45	2.325	4.828	13.3	1.684	7.643
2076-09-17	9.845	25.22	4.275	17.38	2.302	4.158	12.98	1.613	7.659
2076-09-18	9.321	21.53	4.269	15.97	2.309	3.561	12.67	1.491	7.288
2076-09-19	10.05	21.68	4.176	14.65	2.343	3.049	12.33	1.444	7.026
2076-09-20	10.93	24.02	4.738	14.29	2.387	2.694	12.03	1.831	6.6
2076-09-21	11.13	22.39	5.397	14.3	2.412	2.395	11.79	1.822	6.457
2076-09-22	11.18	19.39	6.327	14.54	2.44	2.211	11.55	1.727	6.485
2076-09-23	11.11	17.35	6.822	15.03	2.432	2.17	11.49	1.701	6.481
2076-09-24	10.9	15.88	6.994	15.29	2.402	2.161	11.39	1.692	6.457
2076-09-25	10.52	15.91	7.021	15.09	2.474	2.132	11.13	1.646	6.305
2076-09-26	9.998	14.7	6.872	14.6	2.521	2.101	10.98	1.637	6.353
2076-09-27	9.521	12.88	6.575	13.79	2.564	2.123	10.84	1.635	6.375
2076-09-28	8.969	11.69	6.175	12.82	2.653	2.119	10.68	1.623	6.433
2076-09-29	8.467	11.22	5.731	12.1	2.844	2.091	10.54	1.797	7.647
2076-09-30	8.022	10.72	6.231	11.53	2.989	2.167	10.33	1.889	8.744
2076-10-01	7.652	10.21	5.994	10.98	3.073	2.155	10.09	5.01	11.4
2076-10-02	7.31	9.773	5.362	10.6	3.117	2.183	9.832	6.176	13.96
2076-10-03	7.016	9.285	4.874	10.4	3.099	2.152	9.701	5.982	16.09
2076-10-04	6.682	8.747	4.534	10.24	3.015	2.221	9.718	5.695	17.65
2076-10-05	6.346	8.35	4.261	9.997	2.885	2.242	9.721	5.387	18.35
2076-10-06	6.055	7.939	3.953	9.654	2.758	2.284	11.14	5.16	18.2
2076-10-07	5.822	7.494	3.687	9.399	2.66	2.335	12.29	4.729	17.17
2076-10-08	5.6	7.026	3.519	9.044	2.54	2.369	13.51	4.14	15.66
2076-10-09	5.226	6.538	4.023	8.656	2.345	2.386	14.98	3.6	14.26
2076-10-10	5.064	6.186	5.795	8.285	2.21	2.383	16.36	3.187	12.98
2076-10-11	7.602	5.941	7.121	7.914	2.191	2.339	17.14	2.857	11.85
2076-10-12	8.777	11.15	7.863	7.589	2.212	2.252	17.15	2.649	11.02
2076-10-13	8.883	13.31	8.031	7.256	2.21	2.171	16.45	2.491	10.41
2076-10-14	8.772	12.74	7.633	6.974	2.239	2.085	15.62	2.518	9.949
2076-10-15	8.543	11.85	6.892	6.769	2.241	2.288	14.68	2.479	9.961
2076-10-16	8.052	11.14	6.088	6.591	2.234	2.337	13.69	2.394	10.02
2076-10-17	7.447	10.31	5.409	6.409	2.248	2.286	12.84	2.298	9.963
2076-10-18	6.854	9.292	4.89	6.226	2.231	2.263	12.26	2.215	10.02
2076-10-19	6.359	8.245	4.488	6.039	2.195	2.212	11.72	2.2	10.2
2076-10-20	5.909	7.331	4.176	7.229	2.219	2.142	11.17	2.172	10.61
2076-10-21	5.996	7.819	3.92	8.219	2.23	2.061	10.64	2.178	10.57
2076-10-22	5.812	8.047	3.657	9.21	2.202	1.974	10.15	2.178	10.4
2076-10-23	5.449	7.767	3.46	10.39	2.15	1.926	9.684	2.154	10.18
2076-10-24	5.105	7.454	3.292	10.97	2.096	1.874	9.255	2.089	9.915
2076-10-25	4.789	7.358	3.206	10.79	5.504	1.816	8.857	2.015	9.609
2076-10-26	4.561	7.331	3.136	10.03	7.063	1.8	9.189	1.966	9.265
2076-10-27	4.33	7.234	3.054	9.071	7.103	1.78	11.24	1.919	8.875
2076-10-28	4.931	7.036	3.007	8.164	6.883	1.744	12.16	1.869	8.469
2076-10-29	5.179	6.734	2.953	7.443	6.53	1.703	12.36	1.814	8.098
2076-10-30	5.15	6.359	2.912	6.838	6.018	1.699	12.55	1.762	7.806
2076-10-31	5.102	6.164	2.92	6.366	5.408	2.144	12.68	1.714	7.58
2076-11-01	5.042	5.844	2.938	5.936	4.834	2.244	13.96	1.664	7.367
2076-11-02	5.044	5.523	2.96	5.677	4.338	2.085	14.28	1.622	7.177
2076-11-03	5.094	5.294	2.905	5.498	3.922	1.986	14.07	1.584	7.01
2076-11-04	5.097	5.02	2.817	5.369	3.606	1.927	13.84	1.549	6.851
2076-11-05	4.997	4.758	2.766	5.288	3.365	1.872	13.6	1.522	6.713
2076-11-06	7.481	4.544	5.894	5.184	3.204	1.813	13.21	1.498	6.573
2076-11-07	10.84	4.411	7.235	5.088	3.142	1.699	12.63	1.474	6.402
2076-11-08	13.24	4.354	7.162	5.033	3.176	1.575	12.02	1.475	6.193
2076-11-09	14.77	4.626	6.971	4.926	3.255	1.473	11.7	1.47	6.062
2076-11-10	15.21	5.111	7.401	4.963	3.369	1.496	11.62	1.407	5.898
2076-11-11	14.54	5.912	7.42	5.136	3.936	1.503	11.46	1.338	6.393
2076-11-12	13.35	6.884	7.225	5.381	4.594	1.502	11.35	1.334	7.271
2076-11-13	15.5	9.857	6.997	5.535	5.349	1.511	11.32	1.399	8.262
2076-11-14	30.5	12.19	9.325	5.688	6.196	1.507	14.48	1.428	9.212
2076-11-15	41.29	12.85	10.18	5.764	6.908	1.487	16.24	1.45	10.01
2076-11-16	51.1	13.78	10.17	5.73	7.288	1.467	16.82	1.46	10.43
2076-11-17	59.77	14.11	10.99	5.649	7.373	1.438	28.63	1.472	10.69
2076-11-18	63.58	13.64	11.34	5.985	7.548	1.415	37.85	1.471	12.01
2076-11-19	62.76	12.88	11.03	6.218	9.924	1.418	43.9	1.462	12.95
2076-11-20	59.03	12.83	10.61	6.696	12.78	1.421	48.08	1.45	13.18
2076-11-21	65.83	12.52	10.02	6.979	14.42	1.414	49.28	1.433	13.3
2076-11-22	68.69	11.98	9.372	7.099	15.83	2.2	47.23	1.416	13.32
2076-11-23	68.33	11.45	8.648	7.274	16.85	2.625	43.1	1.4	12.99
2076-11-24	68.54	12.28	7.891	7.354	17.25	2.647	42.4	1.356	12.36
2076-11-25	68.49	12.34	7.773	7.383	17	2.552	39.84	1.307	11.6
2076-11-26	67.65	11.88	7.311	7.321	16.2	2.421	36.51	1.253	10.84
2076-11-27	65.72	14.45	6.743	7.226	15.82	7.97	34.31	1.243	10.15
2076-11-28	63.52	15.58	6.65	7.395	16.48	11.43	32.89	1.23	9.562
2076-11-29	59.99	15.62	9.785	7.661	16.23	12.43	31.65	1.218	9.074
2076-11-30	55.89	15.52	11.12	8.625	15.66	12.67	30.32	1.173	8.67
2076-12-01	52.01	15.25	16.61	10.88	15.41	12.33	28.86	1.173	8.367
2076-12-02	48.54	14.67	20.98	14.29	15.21	11.39	27.4	1.168	8.1
2076-12-03	46.62	13.88	23.46	18.66	14.89	10.07	26.05	1.141	7.859
2076-12-04	45.02	13.11	25.48	21.74	15.11	9.683	24.87	1.141	10.49
2076-12-05	42.9	12.73	26.2	23.97	14.95	8.942	23.86	1.159	12.92
2076-12-06	41.27	12.28	25.67	31.2	14.57	7.989	23.03	1.195	22.62
2076-12-07	40.76	14.56	24.21	40.06	14.29	8.933	22.31	1.244	33.14
2076-12-08	39.86	16.04	23.95	47.51	14.01	9.046	21.69	1.275	43.64
2076-12-09	38.64	16.48	22.33	50.03	13.77	8.186	21.2	1.284	52.19
2076-12-10	37.58	16.82	20.01	49.88	13.49	7.212	20.73	1.263	55.84
2076-12-11	36.71	17.09	17.86	48.68	13.16	6.346	20.31	1.212	54.14
2076-12-12	35.94	17.09	16.02	46.67	12.76	5.587	19.89	1.169	48.95
2076-12-13	35.9	16.79	14.39	44	12.32	4.907	19.52	1.155	42.54
2076-12-14	35.96	16.33	12.89	40.98	11.9	4.365	19.19	1.194	36.46
2076-12-15	36.16	15.89	11.53	38.01	11.53	3.93	18.85	1.344	31.7
2076-12-16	36.39	15.5	10.36	35.29	11.2	3.619	18.54	1.579	29.12
2076-12-17	36.44	15.14	9.361	32.94	10.92	3.408	18.25	1.78	27.38
2076-12-18	36.22	14.78	8.517	30.98	10.69	3.26	17.96	1.855	26.35
2076-12-19	35.91	14.38	10.95	29.72	10.48	3.134	17.65	1.796	25.79
2076-12-20	35.7	13.97	13.16	29.28	10.3	3.004	17.35	1.646	25.18
2076-12-21	35.09	13.55	14.84	28.77	10.12	2.881	17.06	1.474	24.27
2076-12-22	34.34	13.4	15.6	28.29	10.31	2.755	16.76	1.331	23.09
2076-12-23	33.74	13.65	15.76	27.94	10.41	2.639	16.46	1.312	21.74
2076-12-24	33.24	13.77	15.49	27.6	10.28	2.521	31.76	1.326	20.38
2076-12-25	32.7	13.88	14.78	27.18	10.07	2.421	45.42	1.236	19.13
2076-12-26	32.13	13.94	13.65	27.3	9.867	2.325	54.32	2.39	18.03
2076-12-27	31.49	13.97	12.33	27.22	9.805	2.406	65.27	4.434	17.02
2076-12-28	32.16	26.2	11.03	27.02	10.17	2.617	74.03	6.857	16.18
2076-12-29	33.28	33.33	9.882	27.09	10.09	2.696	79.2	9.32	15.49
2076-12-30	33.88	36.4	8.922	27.07	9.619	2.565	78.26	10.97	14.87
2076-12-31	35.38	36.9	8.143	26.91	9.179	2.382	73.49	11.25	14.61
2077-01-01	36.12	36.17	7.509	26.8	8.851	2.209	68.16	10.31	14.66
2077-01-02	36.84	35.09	6.998	26.6	8.608	2.091	63.4	8.675	16.94
2077-01-03	38.91	34.59	7.241	26.56	8.408	2.008	59.12	6.898	34.88
2077-01-04	39.79	33.27	7.477	27.03	8.236	1.93	55	5.348	55.54
2077-01-05	39.8	31.62	7.472	27.19	8.085	2.292	50.91	4.151	68.61
2077-01-06	39.9	30.16	12.54	27.2	7.925	4.133	46.94	3.277	76.46
2077-01-07	39.61	32.74	15.45	27.15	7.772	15	43.31	2.648	78.45
2077-01-08	38.94	34.28	16.48	27.49	7.619	35.89	41.2	2.193	74.31
2077-01-09	38.02	32.95	22.94	27.69	7.474	55.33	44.01	1.861	66.19
2077-01-10	36.96	31.21	26.1	30.17	7.33	67.1	46.18	1.607	56.86
2077-01-11	35.82	29.96	26.33	32.77	7.177	75.62	50.72	1.415	48.22
2077-01-12	34.68	29.01	25.88	34.93	7.638	79.58	52.5	1.266	41.07
2077-01-13	33.58	30.7	24.91	36.52	7.919	77.8	52.56	1.123	35.45
2077-01-14	37.71	38.23	23.34	37.24	8.256	71.72	52.36	1.05	31.29
2077-01-15	40.26	41.01	21.33	37.08	8.958	63.58	53.41	0.9958	28.19
2077-01-16	41.28	40.75	19.16	36.24	9.862	55.1	53.24	0.9679	25.85
2077-01-17	41.94	41.37	17.07	35.04	10.49	47.24	52.03	0.9088	23.96
2077-01-18	41.87	41.2	15.32	33.76	10.58	40.24	53.23	0.8202	22.43
2077-01-19	40.87	40.18	13.89	32.53	10.2	34.2	53.07	0.7486	21.14
2077-01-20	39.06	38.85	12.71	31.42	9.55	29.09	52.03	0.7469	20.06
2077-01-21	42.6	37.32	11.78	30.46	8.815	24.91	51.2	0.7377	19.1
2077-01-22	44.22	35.67	11.03	29.57	10.19	21.54	50.49	0.6826	18.27
2077-01-23	44.82	41.14	10.41	28.82	12.96	18.82	49.52	0.6427	17.55
2077-01-24	45.54	44.26	9.863	28.12	18.97	16.59	48.32	0.6473	16.89
2077-01-25	45.57	43.46	9.395	32.71	23.69	14.77	46.93	0.6602	16.37
2077-01-26	44.37	41.58	9.005	35.68	27.07	13.27	45.47	0.6704	15.89
2077-01-27	42.16	39.66	8.657	37.35	29.06	12.03	45.41	0.6218	15.41
2077-01-28	39.58	37.68	8.345	38.73	28.94	10.99	44.8	0.6244	14.91
2077-01-29	36.99	35.67	8.06	39.19	26.97	10.14	43.75	0.6413	14.48
2077-01-30	34.73	33.79	7.804	38.54	23.9	9.414	43.59	0.6516	14.06
2077-01-31	32.8	32.18	7.584	37.04	20.74	8.773	43.42	0.6359	13.65
2077-02-01	31.17	30.82	7.376	35.11	17.83	8.208	43.07	0.6133	13.24
2077-02-02	29.78	29.67	7.176	33.12	15.41	7.835	42.72	0.5608	12.89
2077-02-03	28.72	28.71	6.986	31.28	13.48	9.994	42.32	0.5388	12.56
2077-02-04	28.14	28.01	6.81	29.62	12.15	15.16	41.76	0.5218	12.22
2077-02-05	27.48	27.43	6.64	28.22	11.49	17.85	40.96	0.5215	11.88
2077-02-06	26.94	26.94	6.462	27.04	11.7	18.75	40.12	0.5056	11.56
2077-02-07	26.49	26.38	6.315	25.99	16.32	19.21	39.13	0.4646	11.25
2077-02-08	26.09	25.85	6.144	25.05	25.12	19.44	38.18	0.4667	10.96
2077-02-09	25.48	25.27	5.971	24.22	34.36	19.14	37.22	0.469	10.68
2077-02-10	24.75	24.79	5.827	23.55	42.91	18.33	36.4	0.4694	10.4
2077-02-11	24.04	24.26	5.702	22.83	48.51	17.18	35.57	0.4518	10.12
2077-02-12	30.01	23.76	5.566	22.18	51.46	15.91	34.78	3.494	13.01
2077-02-13	35.52	23.24	5.438	21.56	51.15	14.86	34.02	11.13	19.13
2077-02-14	46.96	22.74	5.312	21.03	55.08	15.97	33.31	19.06	27.15
2077-02-15	52.66	22.41	5.176	20.52	59.89	25.38	32.66	23.25	32.28
2077-02-16	54.53	27.87	5.034	20.02	62.94	29.76	32	25.77	36.08
2077-02-17	55.83	34.58	4.915	19.52	60.14	31.67	31.38	26.92	38.21
2077-02-18	56.74	37.44	4.801	19.08	55.26	34.01	30.76	25.75	37.44
2077-02-19	57.45	38.07	4.691	18.65	52.19	36.11	30.14	22.46	33.87
2077-02-20	56.86	37.67	4.57	18.25	50.76	36.42	29.56	18.17	28.83
2077-02-21	55.01	38.8	4.475	17.84	49.89	34.93	28.96	14.01	29.68
2077-02-22	59.33	42.64	4.418	17.43	48.84	32.4	28.36	11.05	34.26
2077-02-23	61.39	42.51	4.483	17.04	47.26	29.6	27.79	15.03	48.08
2077-02-24	59.33	41.01	4.7	16.66	47.91	26.96	27.19	26.18	61.72
2077-02-25	56.91	41.91	4.879	17.25	46.33	30.34	26.54	45.82	71.7
2077-02-26	55.06	42.9	4.922	24.24	43.72	32.59	25.94	91.97	86.69
2077-02-27	53.31	42.94	4.922	42.21	42	33.73	25.33	135.9	94.34
2077-02-28	51.31	42.36	4.98	57.85	40.99	35.38	24.86	163.5	98.78
2077-03-01	49.1	41.23	5.419	71.79	40.41	37.44	24.31	177	101.1
2077-03-02	46.62	39.59	7.537	86.17	40.07	37.94	23.86	176	101.2
2077-03-03	45.67	37.8	13.56	96.55	39.8	40.2	24.54	161.8	99.27
2077-03-04	44.21	35.91	35.72	115.2	39.35	40.32	28.6	140	95.07
2077-03-05	42.47	34.17	61.16	119.1	38.58	38.62	29.93	116.5	88.96
2077-03-06	40.94	32.64	77.92	113.4	37.57	36.57	29.22	95.27	81.77
2077-03-07	39.58	31.12	87.56	106.6	36.47	35.2	28.23	77.67	74.43
2077-03-08	38.4	29.86	91.17	100.2	35.38	33.72	27	63.77	67.7
2077-03-09	37.43	28.91	88.05	93.71	34.19	32.12	25.43	52.96	61.9
2077-03-10	36.84	28.88	79.52	86.95	33.28	30.45	23.85	44.57	57.09
2077-03-11	36.16	28.48	68.42	80.11	33.67	37	22.4	38.17	53.22
2077-03-12	35.39	27.93	57.29	73.55	33.17	39.48	21.23	32.99	49.99
2077-03-13	34.62	27.48	47.72	67.54	32.43	40.09	20.25	31.86	49.27
2077-03-14	34.02	27.04	40.35	62.42	32.05	40.84	19.43	30.78	48
2077-03-15	33.63	26.68	54.49	58.04	35.11	41.56	18.75	33.33	46.65
2077-03-16	33.27	26.31	64.57	54.31	35.87	41.5	18.21	34.64	45.24
2077-03-17	35.42	26.08	77.32	51.21	34.74	45.91	19.5	35.87	43.67
2077-03-18	36.64	25.82	85.61	48.53	33.39	47.47	20.42	39.23	43.28
2077-03-19	36.07	27.06	88.22	57.9	32.17	46.83	21	43.45	43.47
2077-03-20	35.61	27.57	87.42	71.32	31.57	45.93	23.13	47.94	43.36
2077-03-21	35.48	27.66	86.99	77.51	30.64	44.79	26.92	52.41	43.63
2077-03-22	35.36	27.37	89.09	81.26	30.02	43.34	30.21	55.91	44.18
2077-03-23	35.2	26.96	89.59	83.25	29.44	41.5	31.02	62.09	47.19
2077-03-24	36.62	27.36	105.5	81.66	28.99	40.34	30.89	63.57	49.01
2077-03-25	37.61	26.84	111.5	76.9	28.99	42.01	31.33	63.69	48.72
2077-03-26	40.35	26.18	109.2	70.69	28.75	44.24	30.63	62.35	47.93
2077-03-27	46.8	26.46	105.2	66.13	28	43.73	29.55	60.35	47.04
2077-03-28	48.59	26.04	100.2	61.97	27.57	42.43	30.23	58.32	45.91
2077-03-29	48.16	25.42	95.52	58.83	27.17	43.04	31.14	57.12	44.96
2077-03-30	48.05	24.57	91.98	57.4	26.37	43.12	32.52	54.91	43.48
2077-03-31	47.96	23.56	87.51	57.83	26.41	42.38	35.12	52.02	42.89
2077-04-01	47.51	22.62	97.27	57.21	26.09	41.29	38.98	48.62	41.82
2077-04-02	46.97	21.79	98.56	56.38	28.01	39.97	42.59	45.05	40.23
2077-04-03	46.03	21.45	94.85	55.61	28.69	38.51	44.9	41.94	38.59
2077-04-04	44.7	21.52	90.38	54.71	28.54	36.43	45.37	39.45	37.91
2077-04-05	43.24	21.33	90.56	53.5	28.91	34.53	44.39	37.66	41.78
2077-04-06	41.68	20.86	88.43	51.92	29.81	32.82	42.23	36.16	43.01
2077-04-07	40.19	20.39	83.61	49.93	29.23	31.31	39.4	34.94	41.73
2077-04-08	39.02	22.08	78.58	47.95	28.83	29.59	36.65	33.75	40.42
2077-04-09	37.78	25.31	73.72	45.87	29.41	27.82	34.48	32.5	39.43
2077-04-10	36.72	25.58	69.07	44.01	32.03	26.89	32.2	31.39	38.51
2077-04-11	36.17	28.63	64.37	42.03	35.05	30.64	30.61	30.01	37.4
2077-04-12	35.35	30.04	60.83	41.07	40.26	32.3	29.73	28.38	36.99
2077-04-13	35.09	32.51	57.82	40.17	43.29	32.92	28.24	27.19	36.07
2077-04-14	34.44	33.34	55.3	39.09	45.61	33.84	27.48	26.16	34.84
2077-04-15	36.92	32.91	52.88	38.03	46.59	34.62	27.4	25.13	34.27
2077-04-16	37.22	32.55	50.57	37.01	46.09	34.45	26.92	24.31	33.76
2077-04-17	36.25	31.79	51.22	37.34	44.66	33.43	28	23.52	33.18
2077-04-18	35.86	30.47	53.75	37.06	42.6	31.61	28.96	22.65	32.49
2077-04-19	35.68	36.78	62.88	35.8	40.16	29.62	29.37	21.93	31.63
2077-04-20	35.68	37.34	65.35	34.61	37.84	28.23	29.34	21.39	30.51
2077-04-21	35.71	35.23	63.53	33.57	35.47	26.45	29.01	20.45	29.04
2077-04-22	64.22	43.01	62.22	32.45	33.43	25.23	28.07	19.55	28.03
2077-04-23	75.2	44.56	62.22	31.48	31.57	24.22	26.72	18.34	26.5
2077-04-24	74.86	44.07	60.25	30.76	30.63	23.1	25.48	21.52	25.19
2077-04-25	81.87	43.45	56.62	29.83	29.6	21.77	24	26.68	24.34
2077-04-26	87.11	42.69	53.88	29.09	28.49	20.78	22.77	28.89	23.25
2077-04-27	85.67	41.65	51.23	28.3	27.24	20.18	21.77	29.13	22.64
2077-04-28	81.19	40.25	49.5	28.52	26.24	19.43	20.83	29	21.91
2077-04-29	76.47	38.58	47.73	28.54	25.22	18.69	20.06	28.73	21.09
2077-04-30	71.41	36.56	45.99	28.11	24.07	17.8	19.22	27.53	20.46
2077-05-01	66.36	34.77	45.03	28.1	23.92	21.06	18.41	26.43	19.89
2077-05-02	61.56	32.56	43.46	27.6	41.81	22.42	17.8	25.41	20.03
2077-05-03	56.99	31.89	41.42	26.57	47.25	22.03	16.85	23.61	19.72
2077-05-04	53.49	30.6	40.04	26.04	45.24	21.75	16.46	21.08	18.77
2077-05-05	50.68	29.13	38.45	25.16	43.87	21.37	15.85	19.17	17.99
2077-05-06	48.2	28.2	36.71	23.99	42.76	20.26	26.91	18.34	17.46
2077-05-07	46.13	27.05	35.23	27.28	40.78	18.6	35.35	17.33	16.89
2077-05-08	44.14	25.78	34.16	32.12	38.46	16.99	38.32	17.04	16.45
2077-05-09	42.48	24.75	32.82	33.96	35.38	15.56	38.07	16.21	16.3
2077-05-10	41.02	23.68	31.93	33.48	32.25	14.89	36.69	15.31	16.12
2077-05-11	39.51	22.73	30.96	32.38	29.78	14.31	34.11	14.96	21.11
2077-05-12	38.17	21.53	30.02	31.39	27.93	13.71	30.9	14.87	23.82
2077-05-13	36.79	20.95	29.04	30	26.33	12.92	27.81	14.53	22.93
2077-05-14	35.42	21.62	28.31	28.65	24.76	12.4	24.62	15.23	21.53
2077-05-15	34.79	21.24	27.31	27.42	23.22	11.6	22.35	15.43	21.64
2077-05-16	34.12	21.15	26.57	27.01	21.79	11.07	20.73	15.24	22.31
2077-05-17	33.46	21.17	26.11	26.11	21.02	11.15	20.19	14.96	21.92
2077-05-18	32.6	20.95	25.5	25.18	20.52	10.9	18.83	14.62	21.01
2077-05-19	32.06	20.28	24.76	24.02	19.85	10.46	17.23	15.07	19.55
2077-05-20	31.15	21.78	24.08	23.2	18.99	9.813	15.88	14.97	18.15
2077-05-21	30.61	22.28	23.45	22.11	18.28	9.375	14.68	14.69	18.36
2077-05-22	30.35	22.48	22.75	20.91	17.79	9.068	13.88	14.21	18.35
2077-05-23	30.37	25.87	22.17	20.43	17.42	8.97	13.14	13.48	17.67
2077-05-24	30.7	29.34	21.38	19.94	16.53	8.868	12.51	15.82	16.56
2077-05-25	32.21	32.14	20.7	19.33	16.19	8.713	13.75	15.78	16.27
2077-05-26	33.92	33.26	19.68	18.87	16.18	8.485	13.9	15.66	15.78
2077-05-27	35.38	33.93	18.96	18.54	16.18	8.342	13.74	15.13	16.23
2077-05-28	36.56	35.51	19.01	18.05	16.05	8.696	13.77	14.51	19.62
2077-05-29	36.77	39.24	18.69	17.58	16.01	8.241	14.15	14.13	18.55
2077-05-30	36.68	39.05	18.18	17.81	15.36	7.626	14.47	13.59	16.53
2077-05-31	36	36.51	17.68	17.74	15.19	7.314	14.35	12.96	14.88
2077-06-01	35.24	34.31	16.64	16.57	14.7	7.273	14.31	12.3	13.67
2077-06-02	33.94	33.13	16.35	16.35	13.97	7.217	13.89	11.67	12.9
2077-06-03	32.51	31.87	16.17	17.45	17.18	7.157	13.68	11.29	12.33
2077-06-04	31.14	30.72	20.05	17.55	19.14	6.818	13.5	11.16	19.46
2077-06-05	30.06	29.51	21.3	17.28	19.54	6.435	13.29	10.81	25.3
2077-06-06	28.85	28.5	20.83	17	19.24	17.55	12.69	10.28	23.66
2077-06-07	27.78	27.63	20.58	16.64	27.31	21.3	13.74	10.02	19.7
2077-06-08	26.72	26.89	20.27	16.25	36.65	19.64	13.91	9.914	19.17
2077-06-09	26.44	25.66	19.75	16.04	42.89	17.42	13.13	10.06	31.03
2077-06-10	25.95	24.37	19.44	15.55	45.09	15.29	12.21	10.84	33.95
2077-06-11	25.32	23.47	18.66	15.27	44.49	13.06	11.24	10.98	30.28
2077-06-12	25.18	22.52	17.84	14.71	43.28	11.73	11.16	10.98	27.22
2077-06-13	25.96	21.85	17.76	14.73	41.08	10.29	10.59	10.91	24.89
2077-06-14	27	21.16	17.17	14.16	54.06	8.77	9.583	11.19	22.78
2077-06-15	27.99	20.38	16.44	14.08	61.43	7.314	8.9	11.68	25.73
2077-06-16	30.42	20.07	16.15	13.49	69.66	8.946	8.955	11.87	24.88
2077-06-17	32.1	20.34	16.04	12.87	70.3	9.327	8.959	11.89	21.69
2077-06-18	34.9	20.59	15.74	12.02	66.36	15.23	9.033	11.47	19.47
2077-06-19	37.16	20.55	15.34	11.52	61.39	16.12	9.066	17.49	18.31
2077-06-20	39.96	20.15	15.07	11.41	56.39	13.07	8.992	18.23	17.24
2077-06-21	41.6	19.61	15.6	11.32	52.46	10.67	8.789	15.25	16.77
2077-06-22	42.37	18.93	16.87	12.12	48.75	8.419	8.612	14.05	16.96
2077-06-23	43.27	18.31	17.43	12.82	45.26	6.424	7.782	17.04	17.58
2077-06-24	43.48	18.03	18.18	13.04	42.23	5.584	7.6	24.83	18.04
2077-06-25	43.14	18.05	19.41	13.43	39.31	5.264	7.851	33.79	18.2
2077-06-26	42.4	17.54	19.56	13.54	54.49	4.848	9.168	40.82	17.84
2077-06-27	40.75	17.82	19.62	13.23	62.69	4.578	10.07	42.53	17.12
2077-06-28	38.73	16.8	19.66	12.74	65.78	4.292	10.61	41.88	16.37
2077-06-29	36.61	16.08	19.53	12.07	67.33	4.506	10.8	40.56	15.3
2077-06-30	34.64	15.73	19.32	11.66	68.11	4.57	10.76	39.05	14.35
2077-07-01	33.05	14.96	19.18	11.47	66.01	4.638	10.54	37.48	13.49
2077-07-02	32.81	14.43	21.16	10.74	60.8	4.612	9.848	34.67	12.69
2077-07-03	36.77	14.37	22.09	10.59	55.27	4.541	9.025	32.69	11.84
2077-07-04	41.35	13.97	20.79	10.25	51.49	4.481	8.195	30.32	11.72
2077-07-05	46.53	13.98	18.95	10.19	69.77	4.426	6.841	27.28	11.74
2077-07-06	50.94	13.42	17.73	10.28	73.51	4.273	6.12	27.25	11.73
2077-07-07	52.41	13.21	19.23	10.34	67.31	4.188	6.286	26.68	11.56
2077-07-08	50.55	12.96	20.15	10.62	62.48	4.08	6.256	24.66	11.54
2077-07-09	46.95	12.81	20.2	10.63	59.19	3.815	6.222	22.52	11.05
2077-07-10	43.08	13.26	19.56	10.39	55.82	3.519	6.104	20.97	11.03
2077-07-11	39.6	13.42	18.83	9.822	52.08	3.198	6.03	19.56	10.68
2077-07-12	36.32	13.01	18.06	9.229	49.07	3.219	6.097	18.01	10.53
2077-07-13	33.55	13.35	17.22	9.077	45.8	3.665	6.184	19.05	10.52
2077-07-14	32.22	14.55	16.41	8.868	43.2	3.854	6.177	18.17	10.61
2077-07-15	30.72	15.11	16.09	8.47	40.47	3.91	5.856	17.05	10.54
2077-07-16	29.1	15.46	15.56	8.192	38.19	3.93	5.091	16.46	10.3
2077-07-17	27.6	15.54	15.15	7.738	36.04	3.846	4.714	15.93	10.27
2077-07-18	26.09	15.24	14.34	7.098	34.08	3.673	4.324	15.36	9.941
2077-07-19	24.66	15.3	15.41	7.038	45.15	3.555	4.281	15.35	9.926
2077-07-20	23.76	15.11	15.67	7.1	49.2	3.378	4.193	15.12	10.21
2077-07-21	22.88	14.73	15.49	7.097	46.9	3.431	4.286	14.59	10.29
2077-07-22	21.99	14.19	16.53	7.537	47.83	3.286	4.412	14.02	10.01
2077-07-23	21.13	14.18	17.16	7.932	46.78	3.066	4.552	13.62	10.07
2077-07-24	20.5	13.61	17.1	7.932	44	3.686	4.648	13.02	9.834
2077-07-25	19.9	12.68	17.01	7.915	41.42	3.806	4.588	12.56	9.234
2077-07-26	18.82	11.3	21.12	8.193	38.98	3.614	4.362	11.78	9.17
2077-07-27	18.11	10.98	23.52	8.178	36.74	3.477	3.654	11.44	8.8
2077-07-28	17.52	10.55	24.76	7.951	34.29	3.271	3.621	11.38	8.17
2077-07-29	17.13	10.5	26.26	7.685	32.81	2.831	3.724	11.42	7.964
2077-07-30	17.32	10.79	26.65	7.346	31.05	2.602	3.726	11.35	7.781
2077-07-31	17.17	10.75	26.4	6.788	29.4	2.528	3.6	11.16	7.123
2077-08-01	16.9	11.23	25.11	5.995	32	2.314	3.255	10.91	6.904
2077-08-02	17.19	11.2	22.94	5.58	58.47	2.069	3.121	10.63	7.361
2077-08-03	16.65	11	20.74	5.209	226.2	1.8	3.066	10.28	7.755
2077-08-04	15.78	11.15	18.79	5.171	308	1.788	3.005	9.869	7.77
2077-08-05	15.7	11.03	17.16	5.163	321.2	1.723	2.824	9.248	7.609
2077-08-06	15.42	11.11	16.42	5.111	313.7	1.629	2.742	9.265	7.488
2077-08-07	15.26	11.64	15.84	5.05	295.4	1.591	2.689	9.269	7.283
2077-08-08	14.88	12.23	15.28	5.065	263.1	1.59	2.594	9.184	7.254
2077-08-09	14.63	12.69	14.9	5.093	223.8	1.521	2.573	9.002	7.33
2077-08-10	14.33	12.72	14.72	5.068	186.1	1.475	2.689	8.613	7.342
2077-08-11	14.18	12.12	14.86	5.085	155.8	1.605	2.774	8.189	7.45
2077-08-12	14.21	11.85	15.81	5.057	132.1	1.709	2.896	7.877	8.042
2077-08-13	13.94	11.44	16.35	5.201	113.3	1.679	3.007	7.664	8.761
2077-08-14	13.73	10.65	18.52	5.426	99.2	1.749	3.011	7.362	9.387
2077-08-15	13.25	9.524	21.1	5.929	89.01	1.762	3.011	7.391	9.722
2077-08-16	12.81	8.719	23.15	6.517	80.77	1.733	3.18	7.185	9.73
2077-08-17	12.45	8.168	25.82	6.871	73.86	1.662	3.171	6.893	9.272
2077-08-18	11.91	7.464	28.31	6.97	68.43	1.736	3.124	6.77	8.889
2077-08-19	11.42	6.484	29.81	6.86	63.72	1.75	3.105	6.476	8.392
2077-08-20	11.33	6.061	30.21	6.517	59.37	1.823	2.917	6.485	8.136
2077-08-21	11.11	6.082	30.49	6.162	56.8	1.792	2.665	7.646	7.938
2077-08-22	12.03	5.94	30.2	5.792	54.25	1.788	2.54	7.795	8.053
2077-08-23	12.1	5.893	28.97	5.472	51.27	1.803	2.51	7.399	8.529
2077-08-24	12.52	5.54	27.43	5.219	48.79	1.85	2.429	7.108	9.289
2077-08-25	12.55	6.399	29.94	5.087	46.86	1.791	2.362	6.847	10.15
2077-08-26	12.32	6.921	36.5	5.185	45.08	1.725	2.642	6.536	11.48
2077-08-27	13.34	7.198	36.76	5.369	43.63	1.645	3.333	6.216	12.66
2077-08-28	13.49	7.367	32.91	6.906	42.32	1.295	4.298	6.064	13.47
2077-08-29	13.08	7.376	31.85	8.192	41.08	1.105	4.918	6.111	13.59
2077-08-30	12.63	7.153	32.18	9.148	40.18	1.073	5.098	6.063	13.04
2077-08-31	12.22	6.829	33.99	9.634	39.29	1.224	4.951	6.069	12.23
2077-09-01	11.81	6.505	34.42	10.54	39.36	1.335	4.756	5.986	11.66
2077-09-02	11.27	6.216	34.38	11.06	38.99	1.38	4.523	5.49	10.97
2077-09-03	10.85	5.827	35.64	11.05	38.73	1.651	4.316	5.589	10.35
2077-09-04	10.5	5.296	49.31	10.35	38.48	2.247	4.08	5.72	10.27
2077-09-05	10.42	5.225	60.52	9.374	37.94	2.432	3.798	5.7	10.53
2077-09-06	10.24	5.21	117.8	8.49	37.12	2.358	3.515	5.649	10.92
2077-09-07	9.996	5.209	144.4	7.729	36.01	2.314	3.231	5.607	11.09
2077-09-08	9.655	5.231	139.4	7.142	34.7	2.237	3.035	5.496	11.42
2077-09-09	9.169	5.188	131.2	6.697	33.63	2.085	2.909	5.033	12.31
2077-09-10	8.545	4.611	123.2	6.307	32.43	1.91	2.869	4.745	13.73
2077-09-11	8.37	4.523	114.4	5.987	32.41	1.724	2.844	4.699	15.76
2077-09-12	8.407	4.647	129.9	5.698	31.79	1.571	2.737	4.602	18.49
2077-09-13	8.872	4.762	128.3	10.4	31.18	1.535	2.716	4.677	23.41
2077-09-14	9.108	7.769	111.9	32.38	30.74	1.487	2.787	4.741	27.02
2077-09-15	9.193	9.396	95.82	34.05	30.22	1.467	2.824	4.867	28.48
2077-09-16	9.202	9.597	84.49	25.72	29.36	2.357	2.909	4.96	27.82
2077-09-17	9.085	9.38	76.83	19.02	28.76	2.627	2.996	4.929	25.52
2077-09-18	8.747	8.989	71.57	14.6	28.23	2.537	3.09	4.818	22.39
2077-09-19	7.812	8.323	67.98	11.78	27.66	2.474	3.149	4.636	19.24
2077-09-20	7.216	7.508	64.54	9.902	28.57	2.41	3.2	4.295	16.75
2077-09-21	7.196	6.742	61.33	8.476	29.54	2.28	3.211	4.208	14.8
2077-09-22	7.207	6.182	61.47	7.483	29.89	2.228	3.253	4.19	13.16
2077-09-23	7.29	5.703	86.25	6.842	29.93	14.28	3.279	4.139	12.03
2077-09-24	7.402	5.336	113.4	6.225	29.78	16.71	3.332	4.482	11.46
2077-09-25	7.62	5.201	126.6	5.495	29.3	13	3.372	4.639	12.08
2077-09-26	8.284	5.215	128.9	4.721	28.51	10.64	3.394	4.715	14.29
2077-09-27	8.393	5.298	123.4	4.264	27.44	8.927	3.384	4.734	17.95
2077-09-28	10.66	5.365	112.6	4.585	25.87	7.524	3.339	4.8	22.67
2077-09-29	11.76	5.488	100.8	4.723	24.69	6.275	3.303	4.821	27.02
2077-09-30	11.67	5.418	89.77	4.735	23.42	5.38	3.225	4.797	29.96
2077-10-01	11.5	5.684	80.39	4.699	22.9	4.673	3.086	4.755	31.54
2077-10-02	11.15	6.901	73.05	4.696	22.24	4.197	2.888	6.055	31.58
2077-10-03	10.7	6.894	67.39	4.665	21.88	3.773	2.7	6.685	30.65
2077-10-04	10.18	6.054	62.92	4.533	21.79	7.242	6.142	6.697	29.12
2077-10-05	9.578	5.348	59.45	4.55	21.57	8.877	7.949	6.555	27.14
2077-10-06	10.14	6.194	56.68	4.915	21.27	8.955	8.283	6.342	24.76
2077-10-07	10.43	7.637	54.42	5.817	21.2	8.599	7.969	5.991	22.28
2077-10-08	12.29	7.967	52.56	7.199	21.03	8.121	7.393	5.641	20.05
2077-10-09	12.79	7.402	51.17	9.116	20.69	7.468	6.62	5.344	18.22
2077-10-10	11.93	6.841	49.74	10.53	20.42	6.714	5.864	8.046	16.79
2077-10-11	11.17	6.538	48.62	11.25	20.22	5.914	5.179	10.27	16.35
2077-10-12	10.46	6.352	47.63	11.56	19.92	5.159	4.564	11.19	16.57
2077-10-13	9.797	6.068	46.74	12.89	19.54	4.559	4.051	12.23	17.22
2077-10-14	9.212	5.768	49.57	14.52	19.22	4.097	3.627	13.23	18.37
2077-10-15	8.699	5.483	50.31	14.91	18.98	3.67	3.34	13.94	19.38
2077-10-16	8.219	5.213	49.66	14.42	18.59	3.464	3.065	14.03	19.7
2077-10-17	8.757	4.962	49.05	13.74	18.17	3.296	3.073	14.31	19.26
2077-10-18	8.547	11.97	48.5	13.49	17.81	3.107	3.053	14.46	18.2
2077-10-19	7.94	20	50.69	17.42	17.54	2.958	2.916	14.83	17.02
2077-10-20	7.351	22.13	50.92	18.22	17.19	2.845	2.86	15.36	15.83
2077-10-21	6.869	21.42	49.76	16.48	16.94	2.785	2.876	15.5	14.73
2077-10-22	6.598	20.33	48.73	14.83	17.43	2.731	2.877	15.01	13.93
2077-10-23	6.352	19.11	47.87	13.95	18.15	2.691	2.809	14.1	13.34
2077-10-24	7.366	18.42	51	17.24	18.35	2.708	2.85	12.98	12.85
2077-10-25	8.468	17.47	51.84	18.35	19.39	2.728	2.812	11.9	12.52
2077-10-26	8.844	16.22	51.68	18.55	21.04	2.715	2.674	10.95	12.14
2077-10-27	9.432	19.07	52.04	18.9	21.58	2.681	2.568	10.11	11.74
2077-10-28	31.32	31.76	52.06	18.79	21.54	2.615	2.491	9.369	11.32
2077-10-29	49.84	38.15	52.47	20.84	21.37	2.583	2.382	8.756	10.96
2077-10-30	64.51	40.1	52.16	21.64	22.82	2.549	2.343	8.251	10.63
2077-10-31	76.44	41.19	53.25	23.38	33.77	2.521	2.311	7.92	10.32
2077-11-01	82.66	40.97	53.11	24.12	37.75	2.485	2.302	7.641	10.05
2077-11-02	80.65	39.04	52.16	23.99	37.77	2.452	2.32	7.392	9.763
2077-11-03	73.14	35.8	51.43	23.55	38.09	2.418	2.334	7.153	9.464
2077-11-04	63.71	45.74	50.76	22.74	38.19	2.382	3.335	6.891	9.044
2077-11-05	54.52	49.92	50.64	21.59	37.44	2.34	3.989	6.713	8.696
2077-11-06	46.54	47.64	50.18	20.24	35.96	2.301	4.245	6.591	8.447
2077-11-07	39.98	44.62	50.98	24.74	34.56	2.286	4.344	6.471	9.294
2077-11-08	34.76	41.71	51.09	25.87	34.14	2.257	4.643	6.749	10.13
2077-11-09	37.84	39.47	50.66	24.78	33.16	2.231	9.513	6.945	10.84
2077-11-10	39.8	36.45	50.07	23.72	33.31	2.199	12.51	7.172	11.5
2077-11-11	39.62	33.14	50.09	23.88	33.28	2.192	14.23	7.522	12.07
2077-11-12	39.45	30.36	50.97	26.51	33.36	2.19	16.9	8.045	12.68
2077-11-13	39.15	28.22	51.93	34.03	33.7	2.17	18.16	8.335	13.39
2077-11-14	38.22	26.5	54.68	43.84	34	2.147	18.43	8.353	14.14
2077-11-15	36.64	25.06	56.08	47.61	33.93	2.124	18.17	8.195	14.78
2077-11-16	34.36	23.86	56.42	48.82	33.99	2.105	17.43	7.931	15.13
2077-11-17	32.05	22.85	56.6	49.8	33.64	2.081	17.39	7.608	15.1
2077-11-18	29.93	22.03	56.61	49.98	33.04	2.04	16.64	8.114	14.82
2077-11-19	28.78	21.34	56.2	48.8	32.48	2.004	15.29	8.377	14.35
2077-11-20	27.43	20.83	55.27	46.42	32.04	1.971	14.56	8.537	13.86
2077-11-21	26.83	21.86	54.8	46.01	31.65	1.946	13.65	9.6	13.33
2077-11-22	26.05	22.12	58.61	48.59	31.22	1.932	12.67	10.13	12.87
2077-11-23	25.22	25.82	60.44	48.82	30.78	1.914	15.03	10.14	12.71
2077-11-24	24.68	28.97	61.68	48.78	30.32	1.891	17.93	10.02	12.57
2077-11-25	25.77	31.08	64.52	49.27	29.78	1.87	18.85	9.789	12.38
2077-11-26	27.02	32.33	66.44	49.46	29.28	1.85	26.05	9.585	12.26
2077-11-27	31.05	33.73	66.96	48.94	28.8	1.827	30.09	9.265	12.17
2077-11-28	36.42	35.97	66.32	47.62	28.4	1.752	30.7	8.897	12.05
2077-11-29	39.2	35.9	66.9	45.85	27.99	1.714	29.88	8.613	11.94
2077-11-30	40.71	34.79	65.93	43.94	27.67	1.711	28.09	8.396	11.81
2077-12-01	41.86	33.73	63.98	42.18	27.4	2.33	25.64	8.239	11.69
2077-12-02	42.52	33.5	62.2	40.48	27.14	3.373	22.93	8.091	11.59
2077-12-03	42.38	34.35	60.74	38.96	26.92	4.593	20.25	7.92	11.42
2077-12-04	41.63	41.86	59.53	37.64	27.01	5.524	17.77	7.73	11.21
2077-12-05	42.08	45.18	58.35	36.49	27.55	5.801	15.61	7.526	11
2077-12-06	41.36	45.59	57.28	35.51	27.89	5.472	13.82	7.324	10.78
2077-12-07	40.07	45.8	56.16	34.64	27.95	4.836	12.38	7.734	10.67
2077-12-08	38.86	45.7	54.99	34.32	27.98	4.167	11.24	7.926	10.6
2077-12-09	37.84	44.97	54.92	33.96	28.01	3.593	10.33	7.972	10.57
2077-12-10	36.97	43.64	55.38	33.5	29.32	3.151	9.627	8.016	10.6
2077-12-11	36.1	41.96	55.52	33.22	29.64	2.816	9.098	7.99	10.66
2077-12-12	35.2	40.24	56.35	32.95	29.19	2.56	8.74	7.852	10.7
2077-12-13	34.29	38.65	57.71	32.64	28.87	2.367	8.468	7.628	10.83
2077-12-14	33.35	37.23	59.27	32.23	28.83	2.217	16.65	7.388	11.16
2077-12-15	32.42	35.99	60.5	31.76	28.85	2.103	22.87	7.152	11.3
2077-12-16	31.58	34.92	60.92	31.22	28.86	2.021	30.16	6.988	11.4
2077-12-17	30.8	33.94	60.47	30.64	28.7	1.963	35.76	10.89	11.56
2077-12-18	30.53	33.3	59.4	30.09	28.5	1.918	38.62	16.56	11.92
2077-12-19	30.5	32.63	58.08	29.54	28.38	1.88	39.13	19.5	12.2
2077-12-20	30.09	32.03	56.66	29.01	28.89	1.84	37.73	21.67	12.34
2077-12-21	29.93	31.52	55.15	28.48	28.96	1.792	34.91	23.73	12.42
2077-12-22	30.16	31.1	53.73	27.96	48.49	1.74	31.35	25.39	12.44
2077-12-23	30.46	30.68	52.47	27.46	55.3	1.657	27.66	25.59	12.39
2077-12-24	30.71	30.27	51.25	26.98	53	1.529	24.23	24.74	12.28
2077-12-25	30.98	29.85	50.12	26.48	50.71	1.488	21.26	23.49	12.12
2077-12-26	30.95	30.1	49.07	26	49.37	1.458	18.82	22.17	11.91
2077-12-27	31.31	30.1	48.04	25.54	48.28	2.221	23.48	20.92	11.7
2077-12-28	31.5	29.86	47.1	25.08	46.86	3.326	26.47	19.83	11.5
2077-12-29	31.66	29.69	46.15	24.62	45.24	3.954	26.82	18.89	11.31
2077-12-30	31.78	29.48	45.23	24.16	43.7	4.481	26.12	26.59	13.17
2077-12-31	31.77	29.26	44.29	23.71	42.39	5.413	24.64	35.04	17.9
2078-01-01	31.9	29.06	43.4	23.3	41.2	5.898	22.4	43.08	21.43
2078-01-02	31.62	28.86	42.5	22.86	40.08	5.936	19.84	49.94	24.09
2078-01-03	31.1	28.68	41.62	22.4	39.16	6.101	17.41	54.2	28.59
2078-01-04	30.55	28.58	40.72	21.96	38.53	6.247	15.31	54.73	31.22
2078-01-05	30	28.55	39.91	21.55	38.18	6.189	13.64	52.32	33.06
2078-01-06	29.44	28.47	39.11	21.15	38.19	6.035	12.37	48.23	33.98
2078-01-07	29.3	30.12	38.37	20.75	38.3	5.843	11.4	44.06	33.76
2078-01-08	28.99	30.46	37.64	20.34	39.01	5.589	10.65	44.57	34.95
2078-01-09	28.55	30.13	36.97	19.94	39.37	5.266	10.03	45	36.58
2078-01-10	28.19	29.86	36.34	19.57	39.53	4.89	9.5	43.57	36.88
2078-01-11	27.82	29.69	35.67	19.22	39.69	4.5	9.035	42.29	38.94
2078-01-12	27.46	29.41	35.01	18.86	40.02	4.144	8.624	41.49	40.41
2078-01-13	27.06	29.06	34.29	18.49	42.63	3.832	8.261	40.87	40.87
2078-01-14	26.51	28.59	33.57	18.13	44.26	3.572	7.949	39.94	40.69
2078-01-15	25.9	41.46	32.88	17.75	47.08	3.358	7.659	39.68	41.23
2078-01-16	25.29	49.72	32.24	20.7	48.58	3.187	22.29	40.36	42.45
2078-01-17	24.71	53.97	31.64	30.06	48.98	3.05	44.78	40.58	43.14
2078-01-18	25.27	70.45	31.01	42.5	49.34	2.937	56.38	41.56	59.19
2078-01-19	27.31	82.96	30.42	62.37	49.93	2.849	62.51	41.91	69.67
2078-01-20	28.3	90.64	29.82	86.28	50.72	2.778	66.81	46.36	73.17
2078-01-21	28.88	92.79	29.26	101.8	51.19	2.719	85.65	52.01	76.05
2078-01-22	29.34	90.93	28.76	108.8	51.54	2.659	95.01	54.47	74.8
2078-01-23	29.37	86.13	28.19	108.1	51.46	2.61	96.31	55.84	70.76
2078-01-24	28.77	79.39	27.57	100.8	51.11	2.557	94.86	57.02	66.24
2078-01-25	27.77	72.01	27.12	89.59	50.76	2.514	90.29	57.37	62.19
2078-01-26	26.55	65.04	26.66	77.52	50.25	2.489	82.28	56.42	58.57
2078-01-27	25.35	59.05	26.2	66.62	49.49	2.446	72.09	54.52	55.32
2078-01-28	24.36	54.17	25.74	57.71	48.73	2.391	62.11	52.06	52.42
2078-01-29	23.37	50.18	25.2	50.8	47.93	2.352	52.99	49.56	49.93
2078-01-30	22.57	47.62	24.68	45.57	47.33	2.292	45.31	47.28	47.88
2078-01-31	22.98	45.39	24.17	41.6	46.61	2.255	39	45.33	46.14
2078-02-01	23.1	49.79	23.59	38.57	45.87	2.22	33.8	43.58	44.95
2078-02-02	23.04	53.03	22.98	36.16	45.13	2.192	29.52	42.15	44.39
2078-02-03	23.24	55.25	22.45	34.28	44.5	2.177	26	40.92	43.66
2078-02-04	24.48	60.22	21.91	32.78	43.92	2.156	23.08	39.83	42.82
2078-02-05	25.61	63.68	21.54	31.54	43.27	2.13	20.67	38.77	51.15
2078-02-06	26.41	64.64	21.08	30.58	42.63	2.084	18.71	45.41	57.02
2078-02-07	26.63	63.27	20.78	29.94	42.01	2.044	17.08	55.09	60.98
2078-02-08	26.02	60.23	20.28	29.55	41.55	1.993	21.15	60.04	63.74
2078-02-09	24.76	56.31	19.87	29.31	42.1	1.952	25.46	62.98	64.95
2078-02-10	23.23	52.27	19.47	28.96	42.1	1.926	29.46	64.97	64.23
2078-02-11	21.72	48.54	19	28.35	43.08	1.928	32.91	64.86	61.78
2078-02-12	20.36	45.44	25.94	29.75	43.45	1.945	34.67	62.09	58.5
2078-02-13	19.19	42.93	29.43	46.09	44.54	1.961	34.01	57.64	55.12
2078-02-14	18.22	40.92	29.73	57.97	46.69	1.955	32.41	52.85	52.06
2078-02-15	17.44	39.21	29.46	64.69	47.67	1.937	39.08	48.5	49.53
2078-02-16	16.8	37.74	28.95	68.39	47.96	1.921	44.85	44.94	47.48
2078-02-17	16.23	36.53	27.94	67.82	48.09	1.895	50.72	42.25	45.89
2078-02-18	15.64	38.04	26.6	63.21	48.14	1.81	58.69	41.19	44.72
2078-02-19	15.22	40.72	25.01	56.42	48.15	1.722	65.52	40.74	43.79
2078-02-20	14.84	43.65	23.26	49.37	47.79	1.597	69.78	40.53	43.01
2078-02-21	14.48	51.69	21.71	43.17	47.23	1.546	71.43	40.4	42.28
2078-02-22	36.68	87.82	20.21	38.17	46.68	1.644	70.82	40.17	41.58
2078-02-23	70.51	102.2	18.5	34.33	46.25	1.956	68.33	39.69	40.84
2078-02-24	86.5	98.52	17.09	31.34	45.73	2.432	64.45	38.84	39.98
2078-02-25	89.07	91.58	16.3	28.99	44.96	2.872	59.9	37.7	39.03
2078-02-26	86.9	85.69	15.71	27.11	44.07	3.068	55.24	36.58	38.06
2078-02-27	85.43	84.19	15.26	25.56	43.16	2.977	51	35.5	37.1
2078-02-28	81.77	84.2	14.83	24.3	42.36	2.703	47.57	35.13	37.63
2078-03-01	75.72	80.15	14.43	23.21	41.75	2.394	44.63	35.17	37.7
2078-03-02	70.56	74.74	14.21	22.29	43.1	2.107	42.15	34.44	37.18
2078-03-03	66.78	70.32	14.13	21.75	42.81	1.858	40.11	33.47	36.71
2078-03-04	64.26	67.33	14.19	21.5	42.03	1.657	38.44	32.59	36.29
2078-03-05	61.92	64.8	14.53	21.82	41.8	1.487	37.68	31.78	35.68
2078-03-06	59.03	62.39	16.56	29.35	41.4	1.231	37.34	30.98	34.98
2078-03-07	55.88	60.16	19.84	40.94	42.45	1.111	37.01	30.28	34.24
2078-03-08	53.17	58.05	22.21	49.6	43.31	1.033	36.95	29.49	33.42
2078-03-09	52.07	56.09	25.7	55.37	43.7	1.069	36.61	28.77	32.68
2078-03-10	50.39	54.58	36.4	58	43.85	1.745	35.85	28.06	31.96
2078-03-11	48.33	53.05	50.19	58.33	45.02	7.633	35.02	31.03	32.07
2078-03-12	46.32	51.5	60.92	58.1	46.2	17.04	34.14	31.51	31.94
2078-03-13	44.65	50.07	67.27	58.64	46.57	36.46	33.09	30.81	31.79
2078-03-14	43.05	48.86	72.76	60.24	46.8	59.19	31.65	30.12	31.29
2078-03-15	41.58	47.54	73.29	61.77	47.23	74.89	30.2	29.5	30.48
2078-03-16	40.28	46.36	70.31	62.39	47.85	84.86	29.93	29.18	30.14
2078-03-17	39.13	45.45	66.38	61.65	48.07	89.9	29.55	28.7	29.62
2078-03-18	38.15	44.48	63.95	59.67	47.81	87.74	27.97	27.9	28.76
2078-03-19	37.25	43.73	62.59	57.02	47.66	81.49	27.02	26.92	27.92
2078-03-20	36.51	43.11	66.72	53.71	47.09	74.4	26.33	26.15	27.67
2078-03-21	35.73	42.5	86.9	50.65	46.11	67.68	25.43	26.04	28.2
2078-03-22	35.44	41.81	96.41	48.18	45	61.23	28.57	25.48	28.07
2078-03-23	34.78	41.08	97.99	46.15	44.27	55.68	28.13	24.57	27.24
2078-03-24	33.87	40.33	100.5	44.2	44.22	49.82	25.77	23.83	26.46
2078-03-25	33.04	39.57	104.8	42.36	43.52	43.72	23.84	27.88	25.78
2078-03-26	32.36	38.85	109.7	40.82	43.01	38.13	23.21	29.01	25.27
2078-03-27	31.84	38.22	113.6	39.68	45.11	33.74	24.33	28.68	25
2078-03-28	31.22	37.82	115.9	38.91	46.02	33.14	24.79	30.15	26.24
2078-03-29	30.61	37.09	116.1	38.63	46.27	30.81	24.45	31.24	26.84
2078-03-30	29.95	36.28	114.2	37.98	46.33	27.5	23.89	31.77	26.56
2078-03-31	29.28	35.28	110.5	38.01	47.24	25.27	24.14	32.93	29.83
2078-04-01	28.74	34.58	105.6	38.43	46.98	23.16	24.15	36.31	30.67
2078-04-02	30.9	33.9	100.8	38.96	46.96	22.57	23.93	37.27	30.18
2078-04-03	36	33.23	96.19	39.26	47.34	21.18	23.7	36.85	29.91
2078-04-04	39.44	32.73	92.07	38.79	50.12	19.4	25.36	36.8	30.11
2078-04-05	42.12	32.23	88.58	37.96	51.44	21.37	25.61	36.86	30.12
2078-04-06	41.44	31.57	85.42	37.18	51.73	22.47	24.8	36.85	29.65
2078-04-07	38.79	30.92	82.75	36.3	51.65	24.81	24.21	36.15	28.7
2078-04-08	37.18	30.27	80.06	35.64	50.98	26.93	23.96	35.03	27.96
2078-04-09	36.3	29.47	77.49	34.89	49.59	29.13	23.51	33.69	27.11
2078-04-10	35.37	28.8	74.9	34.27	48.85	30.91	22.86	32.09	25.98
2078-04-11	35.56	28.23	72.42	33.32	48.33	31.49	22.07	30.48	24.79
2078-04-12	36.77	27.53	70.12	32.35	48.2	30.98	21.19	28.96	23.84
2078-04-13	54.85	26.87	68	31.45	47.66	29.42	20.35	27.95	23.33
2078-04-14	66.38	26.25	66.17	30.87	46.94	27.62	19.5	27.02	22.55
2078-04-15	65.7	25.49	64.37	30.25	46.25	25.49	18.41	26.39	22.25
2078-04-16	62.74	24.61	62.84	29.68	45.49	23.3	17.71	25.87	22
2078-04-17	60.62	23.78	61.77	29.05	44.59	21.08	17.07	24.92	21.33
2078-04-18	58.53	22.84	60.84	28.75	43.49	19.5	16.95	24.22	20.7
2078-04-19	57.94	21.95	59.76	28.48	42.2	18.15	17.05	23.92	20.69
2078-04-20	55.82	21.5	58.47	27.74	41.02	17.47	16.85	23.42	20.13
2078-04-21	52.38	21.16	57.46	26.97	39.7	16.84	16.46	23.05	19.7
2078-04-22	53.75	20.99	56.14	26.22	38.34	16.06	16.31	22.79	19.09
2078-04-23	52.66	20.66	54.88	25.2	36.84	15.68	15.81	22.67	22.73
2078-04-24	49.48	20.89	56.67	25.59	35.47	16.24	15.42	22.82	24.52
2078-04-25	46.96	20.77	57.93	25.37	34.96	16.08	14.97	25.78	24.35
2078-04-26	46.28	20.58	58.51	24.32	34.44	15.63	14.67	27.84	23.59
2078-04-27	46.16	20.35	59.02	23.17	33.9	15.23	14.12	30.2	26.09
2078-04-28	49.11	20.1	59	22.75	33.19	14.71	13.42	32.38	26.6
2078-04-29	49.84	20.07	60.16	21.95	32.67	14.04	13.14	33.95	26.55
2078-04-30	48.78	23.91	59.29	20.57	31.93	13.11	12.75	35.56	25.96
2078-05-01	47.72	25.74	57.31	19.18	31.49	12.65	12.4	37.41	25.92
2078-05-02	46.62	25.83	54.71	17.98	30.9	12.21	11.97	39.78	25.4
2078-05-03	45.37	25.76	52.85	17.08	30.13	11.58	11.71	43.05	24.1
2078-05-04	44.31	25.49	51.18	16.7	29.2	11.55	11.3	52.27	24.56
2078-05-05	42.73	24.76	49.99	16.46	28.2	11.31	11.08	57.49	23.82
2078-05-06	41.15	23.81	48.55	16.12	26.95	10.8	10.91	59.56	22.55
2078-05-07	40.34	23.15	46.67	15.75	25.63	10.22	10.69	67.59	21.91
2078-05-08	39.46	22.56	44.66	15.49	24.32	9.553	10.39	69.21	21.31
2078-05-09	38.16	22.01	77.94	15.16	23.95	9	10.05	66.96	20.34
2078-05-10	36.82	21.24	84.19	14.98	23.04	8.458	10.06	62.88	22.29
2078-05-11	36.04	20.54	70.66	14.97	22.29	7.964	9.977	58.66	22.3
2078-05-12	35.34	20.04	58.69	14.84	23.26	7.587	9.89	54.9	21.89
2078-05-13	39.89	19.45	51.74	14.74	23.35	7.282	9.66	51.34	22.03
2078-05-14	44.43	18.74	48.01	14.47	22.53	7.263	9.649	48.54	21.89
2078-05-15	48.08	17.89	45.94	13.91	21.86	7.1	9.432	46.33	21.36
2078-05-16	50.06	17.25	43.89	13.17	21.28	7.106	9.053	43.93	20.72
2078-05-17	49.72	16.75	42.72	13.23	20.71	6.975	8.834	41.49	20.17
2078-05-18	47.89	16.36	41.72	13.2	20.19	6.988	8.441	39.33	19.43
2078-05-19	45.79	16.2	40.66	13.2	18.64	6.966	7.902	37.54	18.83
2078-05-20	43.03	16.04	39.53	13.16	17.59	6.952	7.938	36.12	17.98
2078-05-21	39.9	16	38.31	13.02	16.64	6.98	7.788	35.71	17.11
2078-05-22	37.37	15.88	37.06	12.78	16.59	6.925	7.586	35.05	16.6
2078-05-23	35.46	15.23	35.85	12.37	16.54	6.884	7.629	34.19	16.34
2078-05-24	33.62	14.79	34.88	11.79	16.12	6.784	7.479	33.22	16.17
2078-05-25	32.12	14.3	33.42	11.43	16.19	6.279	7.254	32.01	16.07
2078-05-26	30.83	13.81	32.92	11.45	15.65	5.91	6.925	31.1	16.37
2078-05-27	29.63	12.94	32.25	11.29	15.94	5.945	6.468	30.29	16.34
2078-05-28	28.53	12.53	31.74	11.11	16.2	5.85	6.031	29.43	15.95
2078-05-29	28.25	12.55	31.17	11.15	16.13	5.743	5.704	28.41	15.55
2078-05-30	28.03	13.12	30.52	11.28	15.98	5.663	5.297	27.67	14.91
2078-05-31	30.25	13.37	37.24	11.25	15.73	5.455	5.128	26.74	14.07
2078-06-01	58.72	13.38	44.4	11.09	14.56	5.154	5.259	32.55	13.42
2078-06-02	79.38	13.46	47.78	10.58	13.32	4.436	5.309	51.49	12.88
2078-06-03	85.17	13.45	48.36	9.94	12.9	3.888	5.266	68.78	12.13
2078-06-04	84.3	13.29	48.42	9.499	12.7	3.619	4.902	81.66	11.97
2078-06-05	79.59	13.04	47.42	9.238	12.53	3.751	4.319	92.6	11.97
2078-06-06	71.62	12.87	45.98	9.07	12.07	3.753	4.28	96.14	11.8
2078-06-07	63.62	12.61	44.84	8.729	11.74	4.102	5.636	94.32	11.6
2078-06-08	56.04	12.09	42.39	8.204	11.65	4.381	6.51	89.58	11.18
2078-06-09	49.36	11.46	39.95	7.536	11.43	4.402	6.969	83.78	11.14
2078-06-10	43.89	15.87	38.51	7.447	11.27	4.414	7.267	77.95	11.24
2078-06-11	39.49	18.2	37.94	7.17	11.23	4.242	7.083	72.17	11.19
2078-06-12	35.96	18.56	36.98	7.031	11.19	3.887	6.553	66.81	11.11
2078-06-13	33.23	18.81	36.89	7.023	11.18	3.573	5.852	61.85	10.96
2078-06-14	31.38	18.27	35.71	7.296	11.01	3.016	5.104	57.51	10.65
2078-06-15	29.57	17.52	33.83	7.421	10.87	2.474	4.576	53.84	10.13
2078-06-16	28.24	16.42	32.85	7.276	10.57	1.871	3.932	50.31	9.751
2078-06-17	27.15	15.92	31.99	7.237	10.46	2.093	3.411	47.22	9.44
2078-06-18	26.33	15.04	31.42	7.108	10.61	2.224	4.496	44.2	9.029
2078-06-19	26.26	13.96	30.64	6.909	10.41	2.332	5.015	41.96	8.928
2078-06-20	25.79	12.99	29.55	6.71	9.976	2.328	4.998	39.8	11.1
2078-06-21	25.58	12.49	28.47	8.727	9.213	2.418	4.958	38.24	11.56
2078-06-22	25.38	12.14	30	13.88	9.222	2.307	4.669	36.42	11
[truncated: 8,227 more rows]
