# Supplementary material for: Modelling of climate change impact on flow conditions in the lowland anastomosing river
Source: PeerJ. 2020 Jun 23;8:e9275. doi: 10.7717/peerj.9275 (PMC7319031; doi:10.7717/peerj.9275)
Supplement: Supplemental Information 4 [file peerj-08-9275-s004.xlsx]

## Sheet: Xsections
		km 0+000
		Narew down reach
Y-coordinate	X-coordinate	Cross-section distance (m)	Elevation (m a.s.l)
581274	761008	0	115.76
581271	761009	2.67845	115.83
581269	761009	4.93633	115.8
581267	761010	6.56807	115.69
581267	761010	7.33024	115.22
581265	761011	9.14223	115.01
581264	761011	9.67982	114.8
581263	761011	10.7771	114.52
581263	761012	11.6942	114.37
581261	761012	13.2247	114.31
581259	761013	15.0051	114.29
581258	761013	16.5546	114.49
581256	761014	18.5279	114.32
581254	761014	20.9723	114.33
581252	761015	22.8729	114.45
581250	761016	25.1497	114.28
581248	761016	27.259	114.22
581246	761017	29.5801	114.04
581243	761018	31.9708	113.98
581242	761019	33.7227	114.56
581241	761019	34.5354	114.8
581240	761019	35.2501	115.01
581240	761019	35.6013	115.38
581238	761020	37.8971	115.48
581235	761021	40.3036	115.44
581232	761022	43.5924	115.36
581230	761022	46.1443	115.38
		km 0+840
		Narew down reach
Y-coordinate	X-coordinate	Cross-section distance (m)	Elevation (m a.s.l)
580921	760316	0	115.92
580919	760318	3.3181	115.78
580917	760320	5.54217	115.67
580916	760322	7.84422	115.65
580916	760323	8.68022	115.61
580915	760323	8.8605	115.18
580915	760323	9.1105	114.37
580915	760324	10.1405	114.14
580914	760324	11.0045	114.19
580913	760326	12.9647	114.43
580912	760328	15.2247	114.41
580910	760329	17.2908	114.43
580909	760331	19.1788	114.34
580908	760333	21.0729	114.59
580907	760334	23.0109	114.42
580906	760336	24.777	114.62
580906	760336	25.535	114.85
580905	760337	26.171	115.18
580904	760338	27.687	115.38
580903	760339	29.5471	115.57
580902	760341	31.7132	115.74
580900	760343	34.2292	115.84
580899	760344	35.9533	115.9
		km 1+520
		Narew right reach
Y-coordinate	X-coordinate	Cross-section distance (m)	Elevation (m a.s.l)
580404	760343	0	115.73
580406	760344	2.24964	115.91
580407	760344	3.33638	116.06
580408	760345	4.60654	116.13
580408	760345	5.48312	115.41
580409	760345	5.7649	115.11
580409	760346	6.48497	114.7
580410	760346	7.38392	114.48
580412	760347	9.13709	114.46
580413	760348	10.8679	114.55
580415	760348	12.63	114.29
580417	760349	14.7007	114.32
580418	760350	16.114	114.43
580419	760350	17.317	114.46
580420	760351	18.6454	114.52
580421	760351	19.2044	114.43
580422	760352	20.5775	114.44
580422	760352	20.6983	115.41
580422	760352	20.9042	115.68
580423	760353	21.982	116.01
580424	760353	23.3327	116.18
580425	760354	24.3211	116.18
580426	760354	25.6673	116.16
580427	760355	26.6915	116.15
580428	760355	27.8811	116.08
		km 2+170
		Narew right reach
Y-coordinate	X-coordinate	Cross-section distance (m)	Elevation (m a.s.l)
579984	760742	0	116.3
579985	760743	1.60103	116.33
579985	760744	2.35236	115.92
579986	760745	3.81923	115.77
579986	760746	4.81653	116.07
579987	760748	6.37284	116.06
579988	760750	8.62233	115.89
579988	760751	9.96847	115.52
579989	760751	10.134	115.13
579989	760752	10.9748	114.76
579990	760753	12.5982	114.49
579991	760755	14.5615	114.58
579991	760756	16.1714	114.55
579992	760758	18.5462	114.56
579993	760760	20.4826	114.5
579994	760762	22.4996	114.66
579995	760763	24.0246	114.56
579995	760764	25.0398	114.71
579995	760765	25.4199	115.52
579996	760765	25.6035	116.46
579996	760766	26.9138	116.51
579998	760769	30.3037	116.39
579999	760771	32.7008	116.31
580000	760774	35.6927	116.27
		km 2+480
		Narew right reach
Y-coordinate	X-coordinate	Cross-section distance (m)	Elevation (m a.s.l)
579779	760913	0	115.99
579780	760915	1.79805	116.13
579780	760918	5.04105	116.28
579780	760920	6.95951	116.33
579780	760921	8.15458	116.34
579780	760922	8.69689	115.6
579780	760922	8.72689	114.61
579780	760923	9.57069	114.56
579780	760924	10.7051	114.47
579781	760926	12.7539	114.72
579781	760927	14.4207	114.73
579781	760930	16.9521	114.9
579781	760931	18.2975	115.09
579781	760933	19.6537	114.99
579781	760934	21.5215	114.88
579781	760936	23.0379	114.68
579782	760937	23.6101	115.08
579782	760937	24.0121	115.6
579782	760937	24.243	116.01
579782	760939	25.9903	115.94
579782	760941	27.888	116.02
579782	760942	28.9626	116.44
579782	760945	32.1658	116.33
579783	760947	34.5161	116.44
		km 2+920
		Narew right reach
Y-coordinate	X-coordinate	Cross-section distance (m)	Elevation (m a.s.l)
579686	761104	0	116.54
579688	761106	2.18186	116.66
579689	761107	4.28562	116.68
579690	761109	5.92711	116.71
579691	761109	6.7236	116.59
579691	761110	7.21401	115.71
579691	761110	7.64039	115.3
579692	761111	8.4432	114.81
579693	761112	10.3689	114.8
579694	761114	12.3306	114.8
579696	761116	15.1668	114.61
579697	761118	17.6547	114.73
579699	761120	20.3192	114.79
579701	761122	22.9352	114.84
579702	761123	24.4205	115.07
579702	761124	25.1312	115.08
579702	761124	25.2234	115.71
579703	761124	26.2401	116.39
579704	761126	27.5832	116.7
579705	761128	30.2414	116.7
579707	761130	32.7575	116.73
		km 3+170
		Narew right reach
Y-coordinate	X-coordinate	Cross-section distance (m)	Elevation (m a.s.l)
579490	761248	0	116.07
579491	761250	2.12624	116.04
579491	761251	3.41318	116.32
579492	761252	4.05012	116.42
579492	761253	4.95632	116.19
579492	761253	5.28874	115.8
579492	761253	5.46338	115.27
579492	761254	6.38262	114.76
579493	761255	7.77348	114.59
579494	761257	9.60818	114.52
579494	761258	11.0882	114.48
579495	761260	13.2498	114.56
579496	761262	15.0845	114.68
579497	761264	17.3946	114.9
579498	761267	20.0816	114.82
579498	761268	21.6155	115.24
579498	761268	22.0055	115.51
579499	761269	22.3918	115.8
579499	761269	22.9433	116.06
579499	761271	24.8318	116.19
579500	761273	26.7873	116.25
579501	761275	28.8058	116.32
579502	761276	30.5551	116.38
		km 3+440
		Narew right reach
Y-coordinate	X-coordinate	Cross-section distance (m)	Elevation (m a.s.l)
579279	761288	0	116.56
579277	761290	3.26621	116.63
579274	761292	6.53241	116.69
579273	761294	8.50142	116.61
579272	761296	10.556	116.58
579272	761296	10.6341	116.02
579271	761296	11.7677	115.79
579271	761297	11.9022	114.68
579270	761297	12.4478	114.19
579269	761298	14.0132	114.35
579268	761299	15.7348	114.37
579267	761300	17.1731	114.7
579266	761302	19.1496	114.76
579264	761304	21.5372	114.95
579263	761305	23.0536	115.08
579263	761306	24.4704	115.13
579262	761307	25.2494	115.43
579261	761307	26.3622	115.79
579261	761308	26.7376	115.82
579260	761309	28.3246	115.91
579258	761311	30.62	116.1
579257	761312	33.1986	116.25
579255	761315	36.0819	116.46
579252	761318	40.9775	116.47
		km 3+690
		Narew right reach
Y-coordinate	X-coordinate	Cross-section distance (m)	Elevation (m a.s.l)
579031	761320	0	116.57
579033	761323	2.89546	116.66
579034	761324	4.71274	116.67
579034	761325	5.97931	116.67
579034	761326	6.39991	116.46
579035	761326	6.79815	115.86
579035	761326	6.88759	115.64
579035	761327	7.58595	115.61
579035	761327	7.9395	114.7
579036	761328	8.91955	114.48
579036	761329	9.77431	114.38
579037	761330	10.9156	114.57
579037	761331	12.2715	114.85
579038	761332	13.6857	114.96
579039	761334	15.8119	115
579040	761335	16.9484	115.05
579041	761337	19.2086	115.13
579042	761339	21.1152	115.2
579042	761340	22.3323	115.34
579042	761340	22.8694	115.31
579042	761340	22.8794	115.86
579043	761341	23.3942	116.31
579043	761341	24.2266	116.41
579043	761342	24.5938	116.34
579045	761345	27.9681	116.12
579047	761349	32.6138	116.17
579049	761353	36.9458	116.19
579050	761355	39.3848	116.76
579051	761356	41.3137	116.76
		km 3+960
		Narew right reach
Y-coordinate	X-coordinate	Cross-section distance (m)	Elevation (m a.s.l)
578793	761415	0	116.88
578794	761417	2.78374	116.85
578795	761419	4.5204	116.52
578796	761420	5.49169	116.13
578797	761422	7.87719	115.92
578798	761423	9.32733	116.06
578799	761425	11.7934	115.99
578800	761427	13.3465	116
578800	761428	14.3489	115.9
578800	761428	14.9667	115.65
578801	761429	16.1526	115.14
578802	761431	17.7727	115.05
578802	761432	18.8693	115.18
578803	761433	20.503	115.06
578804	761434	21.9444	115.06
578805	761436	23.8016	115.1
578806	761438	26.12	115.01
578807	761440	28.1432	114.89
578808	761442	30.757	114.68
578809	761444	32.6277	114.91
578809	761444	33.1872	115.37
578809	761444	33.4737	115.9
578809	761445	33.8273	116.38
578810	761446	35.1832	116.46
578811	761447	36.9111	116.53
578813	761450	40.2767	116.64
578815	761455	46.1666	116.91
		km 4+200
		Narew right reach
Y-coordinate	X-coordinate	Cross-section distance (m)	Elevation (m a.s.l)
578614	761508	0	117.14
578611	761510	3.3986	117.15
578609	761512	6.30518	117.18
578608	761513	7.7155	116.96
578607	761513	8.48557	116.65
578607	761514	9.19775	116.4
578607	761514	9.28377	115.97
578606	761514	9.53989	115.64
578606	761515	10.5301	115.22
578605	761515	11.9764	114.28
578603	761517	13.8568	114.48
578602	761518	15.4951	114.78
578600	761519	17.0633	114.95
578599	761520	18.5596	114.83
578598	761521	20.262	115.14
578597	761521	21.6644	115.04
578596	761522	22.9686	115.17
578595	761523	24.1948	115.49
578594	761524	25.5051	115.34
578592	761525	27.3653	115.23
578591	761526	28.8318	115.59
578590	761527	30.386	115.63
578589	761528	32.2664	115.57
578587	761529	34.3968	115.48
578585	761531	37.0394	115.58
578583	761532	39.1057	115.6
578582	761533	40.1959	115.83
578582	761533	40.602	115.97
578581	761533	41.1861	116.05
578581	761534	42.4184	116.1
578579	761536	44.7268	116.13
578577	761537	47.2773	116.2
578575	761539	49.4077	116.25
		km 4+460
		Narew right reach
Y-coordinate	X-coordinate	Cross-section distance (m)	Elevation (m a.s.l)
578381	761539	0	117.18
578383	761541	2.56961	117.24
578385	761543	5.5287	117.16
578386	761545	7.65233	116.71
578387	761545	8.50192	116.61
578388	761547	10.3424	116.07
578389	761548	12.0274	116.05
578390	761549	12.8272	116.12
578390	761549	13.9385	116.01
578391	761550	14.6253	115.83
578391	761551	15.6161	115.53
578392	761552	16.7348	115.45
578393	761553	18.5329	115.43
578394	761554	19.9771	115.42
578396	761555	21.8316	115.41
578397	761557	24.0333	115.39
578399	761559	26.3977	115.34
578400	761560	28.1675	115.32
578401	761561	30.1001	115.47
578402	761563	31.806	115.48
578404	761564	33.8449	115.29
578405	761566	35.6927	115.26
578406	761567	37.2568	115.31
578407	761568	38.6727	115.43
578407	761568	39.1685	115.57
578407	761568	39.2251	116.01
578408	761568	39.6496	116.24
578408	761569	40.6761	116.32
578410	761571	42.5024	116.42
578411	761572	44.7962	116.53
578413	761574	47.1607	116.52
		km 4+710
		Narew right reach
Y-coordinate	X-coordinate	Cross-section distance (m)	Elevation (m a.s.l)
578188	761687	0	117.02
578190	761690	3.56237	116.98
578191	761693	6.84188	116.89
578192	761694	8.3787	116.62
578192	761695	8.88978	116.05
578192	761695	9.18994	115.42
578193	761696	10.0768	115.23
578194	761697	11.43	115.12
578194	761699	13.2087	114.88
578195	761700	14.9428	114.93
578196	761702	17.2412	115.05
578198	761704	20.078	115.12
578199	761706	21.8926	115.22
578200	761708	23.613	115.35
578200	761709	25.2751	115.36
578201	761711	27.0588	115.37
578202	761712	28.3041	115.46
578202	761712	28.8958	115.67
578202	761712	28.9058	116.05
578202	761712	29.1476	116.19
578203	761713	30.4426	116.46
578204	761716	32.9879	116.25
578206	761718	35.2726	116.29
578206	761719	37.1816	116.15
		km 5+050
		Narew right reach
Y-coordinate	X-coordinate	Cross-section distance (m)	Elevation (m a.s.l)
577833	761823	0	116.83
577921	761908	122.914	116.81
577922	761909	124.18	116.7
577923	761911	125.884	116.7
577925	761912	128.303	116.11
577926	761913	129.046	115.62
577926	761914	130.276	115.57
577927	761914	131.238	115.44
577928	761915	132.249	115.57
577929	761916	133.89	115.45
577930	761917	134.937	115.55
577931	761918	136.577	115.55
577932	761919	138.176	115.69
577933	761920	139.258	115.68
577934	761921	140.425	115.71
577935	761922	142.214	115.65
577936	761923	144.067	115.49
577937	761924	145.319	115.31
577939	761925	147.193	115.11
577939	761926	148.275	115.14
577940	761927	149.187	114.96
577941	761927	149.951	114.94
577942	761928	151.252	114.85
577942	761929	152.186	114.81
577943	761929	153.133	114.76
577944	761930	154.067	114.66
577944	761931	155.142	114.67
577945	761932	156.267	114.6
577946	761932	157.158	114.54
577946	761933	158.134	114.48
577947	761934	159.138	114.54
577948	761934	160.149	114.79
577949	761935	161.125	114.82
577949	761936	162.221	115.02
577950	761936	163.176	114.89
577951	761937	164.003	114.78
577951	761938	164.965	115.4
577952	761938	165.142	115.39
577952	761938	166.125	115.4
577953	761939	166.564	115.42
577954	761940	168.006	115.4
577954	761940	168.905	115.83
577955	761941	169.506	116.11
577955	761941	170.171	116.26
577956	761942	171.274	116.53
577957	761943	172.893	116.56
577958	761944	174.272	116.48
577960	761945	176.217	116.69
		km 5+120
		Narew upper reach
Y-coordinate	X-coordinate	Cross-section distance (m)	Elevation (m a.s.l)
577902	761970	0	116.31
577904	761972	2.95655	116.45
577906	761973	4.83104	116.26
577907	761974	6.11828	116.09
577907	761975	6.55692	115.88
577908	761975	7.639	115.44
577909	761976	8.85555	114.88
577909	761977	9.81763	114.57
577912	761979	12.6752	114.44
577913	761980	14.5	114.36
577915	761982	16.9756	114.16
577916	761983	18.7721	113.99
577918	761985	21.4601	114.13
577919	761986	23.6811	114.47
577921	761988	26.3901	114.86
577923	761990	28.5473	115.29
577924	761990	29.4597	115.9
577924	761990	29.5237	116.09
577924	761991	30.0541	116.32
577924	761991	30.2734	116.43
577925	761992	31.759	116.7
577926	761993	33.0179	116.85
577927	761993	33.4069	117.07
		km 5+260
		Narew upper reach
Y-coordinate	X-coordinate	Cross-section distance (m)	Elevation (m a.s.l)
577802	762062	0	116.59
577803	762063	1.85284	116.62
577805	762065	3.7975	116.62
577806	762066	5.31792	116.6
577806	762066	6.12402	116.66
577807	762067	6.59784	116.11
577807	762067	6.78169	115.94
577808	762067	7.57377	115.76
577809	762069	9.23561	115.42
577810	762070	11.1661	115.18
577812	762072	13.9029	115.24
577815	762074	17.6721	115.21
577816	762075	19.0156	115.27
577818	762078	22.0989	115.29
577819	762079	24.0223	115.27
577821	762080	26.3207	115.33
577823	762082	28.5836	115.36
577824	762084	30.6838	115.44
577826	762085	33.4205	115.46
577828	762088	36.4048	115.53
577831	762090	40.379	115.56
577834	762093	43.8865	115.59
577835	762094	46.1211	115.54
577836	762095	47.2667	115.54
577836	762095	47.7264	115.53
577837	762096	48.1578	116.11
577837	762096	48.6103	116.42
577837	762096	49.0276	116.64
577839	762099	52.132	116.79
577842	762101	55.9012	116.93
577843	762102	57.5348	116.75
		km 5+470
		Narew upper reach
Y-coordinate	X-coordinate	Cross-section distance (m)	Elevation (m a.s.l)
577705	762260	0	116.99
577707	762261	1.60552	117.09
577708	762262	3.31725	117.07
577709	762263	4.70346	117.03
577710	762264	5.92002	116.56
577710	762264	6.33727	116.18
577710	762264	6.54245	115.71
577710	762265	7.08004	115.43
577711	762265	7.6459	115.36
577712	762266	9.03935	115.35
577713	762267	10.5742	115.25
577714	762269	12.5687	115.26
577716	762270	14.818	115.31
577717	762272	17.2794	115.38
577719	762274	19.267	115.36
577720	762275	21.6787	115.3
577722	762277	23.8642	115.23
577723	762278	24.9677	115.36
577723	762278	25.8094	115.95
577724	762279	26.2408	116.18
577724	762279	26.6015	116.24
577725	762281	28.8084	116.21
577726	762281	30.0249	116.28
577727	762282	30.7605	116.6
577728	762283	32.8187	116.74
577730	762285	35.1529	116.86
577731	762287	37.4374	116.78
		km 0+010
		Narew left reach
Y-coordinate	X-coordinate	Cross-section distance (m)	Elevation (m a.s.l)
580457	760193	0	115.81
580457	760194	1	115.77
580456	760195	1.99	115.74
580456	760195	2.99	115.73
580455	760197	4.96997	115.71
580455	760197	4.99986	115.15
580455	760198	5.49988	115.19
580455	760199	6.32985	115.11
580454	760199	7.28987	114.92
580454	760200	8.49989	114.5
580453	760202	9.83983	114.41
580453	760202	10.0899	114.33
580452	760203	11.3899	114.55
580452	760204	12.5899	114.62
580451	760205	13.2198	115.26
580451	760205	13.7699	115.4
580451	760206	14.7199	115.74
580450	760207	15.6798	115.81
580450	760208	16.6399	115.91
		km 0+110
		Narew left reach
Y-coordinate	X-coordinate	Cross-section distance (m)	Elevation (m a.s.l)
580378	760163	0	115.86
580378	760165	2	115.7
580378	760166	2.99996	115.68
580377	760167	4.00001	115.67
580377	760168	4.99823	115.64
580378	760168	5.36831	114.73
580378	760169	6.17833	114.55
580379	760170	7.00826	114.59
580379	760171	8.14826	115.16
580380	760171	8.69825	115.36
580380	760171	9.33829	115.47
580381	760172	10.0269	115.38
580381	760173	11.0169	115.52
580380	760174	12.0169	115.54
580380	760175	13.0069	115.56
580380	760176	14.0069	115.58
		km 0+390
		Narew left reach
Y-coordinate	X-coordinate	Cross-section distance (m)	Elevation (m a.s.l)
580125	760174	0	115.72
580125	760175	0.989921	115.7
580125	760176	1.98996	115.72
580124	760177	2.97998	115.84
580124	760178	3.9699	115.96
580124	760179	4.9699	115.91
580124	760180	5.51989	115.58
580124	760181	6.45994	115.31
580124	760181	7.19996	114.85
580124	760182	8.0899	114.51
580124	760183	8.35995	114.37
580124	760184	9.51993	114.46
580124	760185	10.4899	114.29
580124	760186	11.6999	114.66
580124	760186	12.1999	114.79
580124	760187	12.4699	114.84
580124	760187	12.5399	115.3
580124	760187	13.1199	115.44
580124	760188	13.6899	115.4
580124	760188	13.6999	115.8
580124	760189	14.6999	115.82
580124	760190	15.6899	115.84
580124	760191	16.6899	115.85
		km 0+690
		Narew left reach
Y-coordinate	X-coordinate	Cross-section distance (m)	Elevation (m a.s.l)
579896	760034	0	116.27
579896	760035	0.999915	116.32
579896	760035	1.99989	116.33
579895	760036	2.9999	116.29
579895	760037	3.99992	116.16
579895	760038	4.40985	115.32
579895	760038	4.85989	114.88
579895	760039	5.66985	114.5
579895	760040	6.99985	114.35
579895	760041	7.75991	114.38
579895	760042	8.83989	114.46
579895	760043	9.45994	114.58
579895	760043	9.97988	114.63
579895	760044	10.6299	114.73
579895	760045	11.2799	114.84
579895	760045	12.0899	115.08
579895	760046	12.8399	115.49
579895	760047	13.3999	115.74
579895	760047	13.4698	116.08
579895	760048	14.4599	116.17
579895	760049	15.4598	116.27
579895	760050	16.4599	116.39
579895	760051	17.4498	116.49
579895	760052	18.4499	116.56
		km 1+070
		Narew left reach
Y-coordinate	X-coordinate	Cross-section distance (m)	Elevation (m a.s.l)
579550	759941	0	115.95
579550	759942	0.66001	114.89
579550	759942	1.27997	114.59
579550	759943	2.15994	114.41
579549	759944	3.49998	114.24
579549	759945	4.42998	114.22
579549	759946	5.45999	114.21
579549	759948	6.65993	114.19
579549	759948	7.46996	114.24
579548	759949	8.23997	115.14
579548	759950	8.81	115.95
579548	759950	9.20996	116.16
		km 1+180
		Narew left reach
Y-coordinate	X-coordinate	Cross-section distance (m)	Elevation (m a.s.l)
579448	759896	0	116.12
579448	759897	0.369991	115.31
579449	759897	1.19997	114.82
579449	759898	2.27	114.71
579449	759900	3.85998	114.76
579449	759901	5.07996	114.71
579449	759902	6.21997	114.88
579449	759903	7.16998	114.9
579449	759904	8.10997	114.7
579449	759905	9.01993	114.69
579449	759906	9.91998	114.74
579449	759907	10.79	114.89
579449	759908	11.34	115.17
579449	759908	11.85	115.25
579449	759909	12.39	115.56
579449	759909	13.0099	115.66
579448	759896	26.0199	116.12
579448	759897	26.3899	115.31
579449	759897	27.2198	114.82
579449	759898	28.2899	114.71
579449	759900	29.8799	114.76
579449	759901	31.0998	114.71
579449	759902	32.2399	114.88
579449	759903	33.1899	114.9
579449	759904	34.1299	114.7
579449	759905	35.0398	114.69
579449	759906	35.9399	114.74
579449	759907	36.8099	114.89
579449	759908	37.3599	115.17
579449	759908	37.8699	115.25
579449	759909	38.4099	115.56
579449	759909	39.0298	115.66
		km 1+340
		Narew left reach
Y-coordinate	X-coordinate	Cross-section distance (m)	Elevation (m a.s.l)
579332	759867	0	115.77
579332	759868	0.88999	115.41
579332	759869	1.76997	114.75
579332	759869	2.65996	114.58
579332	759870	3.53994	114.4
579332	759871	4.41992	114.46
579332	759872	5.30991	114.59
579332	759873	6.18999	115.22
579332	759874	7.07997	116.12
		km 1+580
		Narew left reach
Y-coordinate	X-coordinate	Cross-section distance (m)	Elevation (m a.s.l)
579102	759933	0	115.83
579103	759933	0.969596	115.43
579104	759934	1.93958	114.88
579105	759934	2.91962	114.49
579106	759935	3.8896	114.32
579107	759935	4.85958	114.53
579108	759935	5.8296	114.73
579109	759936	6.79958	115.21
579110	759936	7.7696	116
579110	759937	8.73958	116.17
		km 1+780
		Narew left reach
Y-coordinate	X-coordinate	Cross-section distance (m)	Elevation (m a.s.l)
578998	760076	0	116.32
578998	760076	0.280034	116.04
578998	760076	0.440011	115.42
578998	760076	0.690017	115.07
578998	760077	1.40004	114.77
578999	760078	2.34996	114.62
578999	760079	3.50999	114.44
578999	760080	4.77996	114.45
578999	760081	5.62003	114.6
579000	760082	6.83999	114.89
579000	760083	7.64004	115.22
579000	760084	8.24	115.7
579000	760084	8.82997	115.93
579000	760085	9.40003	116.17
		km 1+940
		Narew left reach
Y-coordinate	X-coordinate	Cross-section distance (m)	Elevation (m a.s.l)
578877	760050	0	116.83
578876	760052	2.15955	116.37
578876	760052	2.9396	115.69
578876	760053	3.48956	115.65
578875	760054	4.58955	114.82
578875	760055	5.44958	114.46
578875	760056	6.70957	114.54
578874	760057	7.69961	114.64
578874	760058	8.62955	114.56
578874	760059	9.7796	114.97
578873	760060	10.7296	115.62
578873	760061	12.0387	115.71
		km 2+050
		Narew left reach
Y-coordinate	X-coordinate	Cross-section distance (m)	Elevation (m a.s.l)
578808	760094	0	116.66
578809	760094	0.980003	116.14
578810	760094	2.52992	115.75
578811	760093	3.51998	114.94
578812	760093	4.37997	114.7
578813	760093	5.09	114.69
578814	760093	6.17001	114.51
578815	760093	7.87	114.76
578816	760093	8.81	114.79
578817	760093	9.79995	114.69
578818	760093	10.4399	114.59
578819	760093	11.53	114.64
578820	760093	12.53	114.65
578821	760092	13.8699	115.22
578822	760092	14.42	115.76
578822	760092	14.68	116.01
578823	760092	15.58	116.26
		km 2+270
		Narew left reach
Y-coordinate	X-coordinate	Cross-section distance (m)	Elevation (m a.s.l)
578664	760176	0	117.2
578665	760177	0.989321	117.01
578666	760177	2.53932	116.23
578666	760178	3.16927	115.31
578667	760178	4.29925	114.77
578668	760179	5.30927	114.34
578669	760180	6.29927	114.39
578670	760180	7.25928	114.32
578671	760181	8.2893	114.43
578671	760181	8.95925	114.77
578672	760182	10.0192	114.99
578672	760182	10.3093	115.85
		km 2+370
		Narew left reach
Y-coordinate	X-coordinate	Cross-section distance (m)	Elevation (m a.s.l)
578580	760217	0	116.81
578580	760218	1.13004	116.44
578581	760219	2.14002	116.09
578581	760220	3.05007	115.62
578582	760221	4.36999	115.17
578582	760222	5.24998	115.25
578583	760223	6.58005	115.04
578583	760224	8.06999	115.22
578584	760226	9.45996	115.02
578584	760227	10.54	114.92
578585	760227	11.49	114.69
578585	760229	12.82	114.64
578586	760229	13.7701	114.73
578586	760231	14.99	115.55
578587	760231	15.18	115.87
		km 2+490
		Narew left reach
Y-coordinate	X-coordinate	Cross-section distance (m)	Elevation (m a.s.l)
578476	760183	0	116.26
578476	760184	1.22001	115.98
578476	760185	1.67002	115.59
578476	760186	2.54003	115.46
578476	760186	3.10003	115.3
578476	760187	3.98004	115.23
578476	760188	4.92005	115.21
578476	760189	5.78006	115.21
578476	760190	6.92998	115.37
578476	760191	7.97999	115.39
578476	760192	8.45999	115.71
578476	760193	9.76001	115.87
		km 2+700
		Narew left reach
Y-coordinate	X-coordinate	Cross-section distance (m)	Elevation (m a.s.l)
578417	760251	0	116.11
578416	760253	1.64943	115.94
578416	760255	3.75942	115.66
578415	760258	6.38939	115.46
578414	760260	8.70937	115.42
578414	760262	10.9894	115.54
578413	760264	12.8594	115.57
578413	760265	14.5994	115.43
578412	760267	16.2994	115.45
578412	760267	16.6494	115.73
578412	760270	19.0494	115.91
		km 2+830
		Narew left reach
Y-coordinate	X-coordinate	Cross-section distance (m)	Elevation (m a.s.l)
578325	760263	0	116.66
578326	760264	1.72	116.36
578327	760264	2.77	116.09
578327	760264	3.18003	115.81
578328	760265	4.11004	115.55
578329	760266	5.23003	115.34
578330	760266	6.49009	115.14
578331	760267	7.74002	115.19
578332	760268	8.93999	115.11
578333	760268	9.81005	115.35
578333	760269	10.77	116.04
578334	760269	11.5998	116.14
		km 2+930
		Narew left reach
Y-coordinate	X-coordinate	Cross-section distance (m)	Elevation (m a.s.l)
578154	760402	0	116.68
578154	760403	0.719917	116.48
578154	760403	0.719917	116.54
578155	760403	1.04993	115.95
578155	760403	1.21994	115.58
578155	760404	1.78996	115.27
578155	760404	2.52993	115.02
578156	760405	3.49997	115.04
578156	760406	4.16993	114.79
578157	760406	5.00998	114.66
578157	760407	6.04993	114.93
578158	760408	6.80992	115.25
578158	760408	7.3099	115.51
578158	760408	7.51999	116.1
578158	760409	8.00998	116.3
578159	760409	8.54992	116.23
		km 3+150
		Narew left reach
Y-coordinate	X-coordinate	Cross-section distance (m)	Elevation (m a.s.l)
578179	760594	0	116.42
578180	760594	1	116.42
578181	760594	1.98997	116.38
578181	760594	2.63918	116.13
578182	760593	3.39918	115.68
578182	760593	4.14915	115.74
578183	760592	5.19916	115.66
578183	760591	6.01912	115.52
578184	760591	6.72917	115.42
578184	760590	7.99909	115.33
578185	760589	8.88917	115.25
578185	760588	9.70913	115.15
578186	760587	10.6291	115.17
578186	760587	11.2292	115.35
578187	760586	11.8991	115.64
578187	760586	12.3692	116.24
578187	760585	13.1092	116.54
578188	760585	13.9891	116.79
578189	760584	14.9291	117.15
578189	760583	15.9191	117.67
		km 3+220
		Narew left reach
Y-coordinate	X-coordinate	Cross-section distance (m)	Elevation (m a.s.l)
578125	760853	0	116.27
578125	760853	0.619972	115.49
578126	760852	1.20996	115.23
578127	760852	2.38003	114.94
578127	760851	3.44998	114.84
578128	760850	4.17998	114.75
578128	760850	4.90002	114.98
578129	760849	5.73002	115.08
578130	760848	6.73999	115.17
578130	760848	7.64997	115.38
578131	760847	8.44998	115.4
578132	760847	9.35997	115.45
578132	760846	9.94995	115.54
578132	760846	10.4692	115.96
		km 3+690
		Narew left reach
Y-coordinate	X-coordinate	Cross-section distance (m)	Elevation (m a.s.l)
578132	761065	0	116.34
578133	761065	0.700039	115.74
578134	761064	1.35004	115.36
578135	761064	2.51998	114.94
578136	761064	3.57999	114.66
578137	761064	4.93001	114.29
578139	761063	6.78999	114.05
578139	761063	7.42005	114.05
578141	761063	8.93003	114.79
578141	761062	9.42005	114.29
578142	761062	10.39	114.68
578143	761062	11.19	115.05
578144	761062	11.73	115.51
578144	761062	12.18	116.43
578144	761062	12.4397	116.33
		km 3+930
		Narew left reach
Y-coordinate	X-coordinate	Cross-section distance (m)	Elevation (m a.s.l)
578013	761252	0	116.61
578014	761252	0.239132	115.83
578014	761252	0.819159	115.4
578015	761252	1.55918	115.12
578016	761251	2.46918	114.99
578017	761251	3.27921	114.8
578017	761251	3.60917	114.79
578017	761251	4.10914	114.69
578018	761251	4.74917	114.77
578019	761251	5.42916	114.91
578019	761250	6.18915	115
578020	761250	6.67915	115.14
578020	761250	7.04916	115.39
578020	761250	7.38915	115.47
578021	761250	7.75913	116.23
578021	761250	8.25832	116.09
		km 4+090
		Narew left reach
Y-coordinate	X-coordinate	Cross-section distance (m)	Elevation (m a.s.l)
577975	761382	0	116.98
577976	761382	0.24998	116.58
577976	761382	0.630055	116.14
577976	761382	1.09003	115.68
577977	761383	1.51999	115.15
577977	761383	2.07999	115.03
577977	761383	2.50002	114.71
577978	761384	3.41004	114.8
577979	761384	4.30999	114.96
577979	761384	4.94998	115.25
577980	761385	5.67001	115.57
577981	761385	6.51006	116
577981	761386	7.32004	116.06
577982	761386	8.24	116.21
577983	761387	9.1	116.2
577983	761387	9.38003	116.35
		km 4+200
		Narew left reach
Y-coordinate	X-coordinate	Cross-section distance (m)	Elevation (m a.s.l)
577925	761477	0	116.64
577925	761477	0.10984	116.46
577926	761477	0.359812	116.33
577926	761477	0.569799	115.6
577926	761477	1.08982	115.09
577927	761476	1.68986	114.77
577927	761476	2.43982	114.67
577929	761476	3.7298	114.48
577929	761475	4.48978	114.36
577930	761475	5.26984	114.27
577931	761474	6.09985	114.29
577931	761474	6.74985	114.4
577932	761474	7.21983	114.59
577932	761474	7.51985	114.79
577932	761474	7.78986	114.96
577932	761474	8.03983	115.63
577933	761473	8.51982	116.18
577934	761473	9.2574	116.26
		km 4+320
		Narew left reach
Y-coordinate	X-coordinate	Cross-section distance (m)	Elevation (m a.s.l)
577871	761574	0	117.13
577872	761574	0.980051	117.02
577873	761573	1.96986	116.89
577874	761574	2.73991	116.51
577875	761574	3.86991	116.41
577876	761574	4.95994	116.15
577877	761574	5.68993	115.64
577877	761574	6.2799	115.5
577878	761575	7.31987	115.21
577879	761575	8.25989	115.02
577880	761575	9.43985	114.89
577882	761575	10.5999	115.08
577883	761575	11.7599	115.11
577884	761576	12.9399	115.19
577885	761576	14.1999	115.21
577887	761576	15.6398	115.21
577888	761576	17.0498	115.34
577889	761577	18.1399	115.45
577890	761577	18.9799	115.75
577890	761577	19.5699	116.45
577892	761577	21.1193	116.33
		km 4+460
		Narew left reach
Y-coordinate	X-coordinate	Cross-section distance (m)	Elevation (m a.s.l)
577911	761721	0	116.33
577912	761721	0.470029	115.79
577912	761720	1.05998	115.38
577913	761720	1.74003	115.29
577913	761720	2.29003	115.29
577914	761719	3.04997	115.19
577915	761719	3.76997	115.2
577915	761719	4.08998	115.29
577915	761718	4.46999	115.44
577916	761718	4.89	115.72
577916	761718	5.47995	115.86
577917	761717	6.15001	115.88
		km 4+610
		Narew left reach
Y-coordinate	X-coordinate	Cross-section distance (m)	Elevation (m a.s.l)
577900	761855	0	116.76
577901	761855	0.479967	116.57
577901	761855	0.73	116.19
577901	761855	0.880021	115.73
577902	761855	1.28998	115.62
577902	761855	1.87996	115.63
577903	761855	2.74998	115.75
577904	761855	3.61	115.6
577905	761855	4.51002	115.66
577906	761855	5.10001	115.95
577906	761855	5.57997	116.27
577907	761855	6.32997	116.5
577907	761855	7.05998	116.48
577908	761855	8.05916	116.47
		km 4+680
		Narew left reach
Y-coordinate	X-coordinate	Cross-section distance (m)	Elevation (m a.s.l)
577914	761921	0	116.64
577914	761920	0.960007	116.51
577913	761920	1.86999	116.37
577913	761920	1.91998	116.37
577913	761919	2.04994	116.36
577913	761919	2.74997	115.88
577913	761918	3.44996	115.46
577912	761918	4.09997	115.28
577912	761917	5.01	115.07
577911	761916	5.83001	115.1
577911	761915	6.61992	115.21
577911	761915	7.15998	115.38
577911	761915	7.71998	116.04
577910	761914	8.10992	116.11
577910	761914	8.44997	116.21
577910	761914	8.69002	116.64
577910	761913	9.63995	116.6
